# Supplementary material for: In vitroquantification of botulinum neurotoxin type A1 using immobilized nerve cell-mimicking nanoreactors in a microfluidic platform
Source: Royal Society of Chemistry journal article supplement (doi:10.1039/c9an00817a), 2019-01-01
Supplement: c9an00817a1.xlsx [file c9an00817a1.xlsx]

## Sheet: interact.pep (2).xls
probability	spectrum	peptide	protein	calc_neutral_pep_mass
0.9902	marcv_X1510_191.00004.00004.2	R.TPPPSQGK.G	sp|P81558|MBP_PIG,tr|I3LV79|I3LV79_PIG	810.424
0.9635	marcv_X1510_191.00086.00086.2	K.KC[160.03]DLHR.L	sp|P29804|ODPA_PIG,tr|K7GLA7|K7GLA7_PIG,tr|K7GMN8|K7GMN8_PIG,tr|I3LCI2|I3LCI2_PIG	827.407
0.9132	marcv_X1510_191.00102.00102.2	R.GHQLLKK.H	tr|F1RUH7|F1RUH7_PIG	822.508
0.9904	marcv_X1510_191.00105.00105.2	R.KPTSTVASK.V	tr|F1S8C6|F1S8C6_PIG,tr|K7GMY8|K7GMY8_PIG	917.518
0.9648	marcv_X1510_191.00106.00106.2	R.AADYQRK.S	tr|F1S3P8|F1S3P8_PIG	850.43
0.9865	marcv_X1510_191.00148.00148.2	R.TPPPSQGK.G	sp|P81558|MBP_PIG,tr|I3LV79|I3LV79_PIG	810.424
0.9831	marcv_X1510_191.00157.00157.2	R.TAQSEETR.V	tr|F1RL74|F1RL74_PIG	920.42
0.9656	marcv_X1510_191.00254.00254.2	K.ASSPAPAHGHH.-	tr|F1S9V7|F1S9V7_PIG	1067.49
0.9908	marcv_X1510_191.00287.00287.2	R.TPPPSQGK.G	sp|P81558|MBP_PIG,tr|I3LV79|I3LV79_PIG	810.424
0.9673	marcv_X1510_191.00376.00376.2	R.KTSAQPEK.D	tr|F1RFD8|F1RFD8_PIG	887.471
0.9943	marcv_X1510_191.00392.00392.2	K.ASSPAPAHGHH.-	tr|F1S9V7|F1S9V7_PIG	1067.49
0.99	marcv_X1510_191.00426.00426.2	R.TPPPSQGK.G	sp|P81558|MBP_PIG,tr|I3LV79|I3LV79_PIG	810.424
0.987	marcv_X1510_191.00557.00557.2	R.TPPPSQGK.G	sp|P81558|MBP_PIG,tr|I3LV79|I3LV79_PIG	810.424
0.9893	marcv_X1510_191.00719.00719.2	R.TPPPSQGK.G	sp|P81558|MBP_PIG,tr|I3LV79|I3LV79_PIG	810.424
1	marcv_X1510_191.00736.00736.4	R.EEDGGFDGSPPEDMDNKK.S	DECOY_tr|F1SLR5|F1SLR5_PIG_UNMAPPED	1965.79
0.9541	marcv_X1510_191.00806.00806.2	R.HQLLKK.-	sp|Q1W0Y2|COX7C_PIG,tr|F1RUH7|F1RUH7_PIG	765.486
0.9722	marcv_X1510_191.00822.00822.2	R.NYDSM[147.04]K.D	sp|A1XQT2|COX6C_PIG,tr|F1S0P0|F1S0P0_PIG	772.306
0.9902	marcv_X1510_191.00847.00847.2	R.TPPPSQGK.G	sp|P81558|MBP_PIG,tr|I3LV79|I3LV79_PIG	810.424
0.9544	marcv_X1510_191.00950.00950.2	R.HQLLKK.-	sp|Q1W0Y2|COX7C_PIG,tr|F1RUH7|F1RUH7_PIG	765.486
0.9891	marcv_X1510_191.00992.00992.2	R.TPPPSQGK.G	sp|P81558|MBP_PIG,tr|I3LV79|I3LV79_PIG	810.424
0.9518	marcv_X1510_191.01091.01091.2	R.HQLLKK.-	sp|Q1W0Y2|COX7C_PIG,tr|F1RUH7|F1RUH7_PIG	765.486
0.9648	marcv_X1510_191.01127.01127.2	K.RSDSFNR.N	DECOY_tr|F1S052|F1S052_PIG_UNMAPPED	880.415
0.9908	marcv_X1510_191.01131.01131.2	R.TPPPSQGK.G	sp|P81558|MBP_PIG,tr|I3LV79|I3LV79_PIG	810.424
0.9465	marcv_X1510_191.01226.01226.2	R.HQLLKK.-	sp|Q1W0Y2|COX7C_PIG,tr|F1RUH7|F1RUH7_PIG	765.486
1	marcv_X1510_191.01247.01247.2	K.KPAALKPK.V	tr|F1SK12|F1SK12_PIG	851.559
0.9998	marcv_X1510_191.01274.01274.3	K.SHHANSPTAGAAK.S	tr|F1SAJ9|F1SAJ9_PIG	1247.6
0.9906	marcv_X1510_191.01294.01294.2	R.TPPPSQGK.G	sp|P81558|MBP_PIG,tr|I3LV79|I3LV79_PIG	810.424
0.9486	marcv_X1510_191.01437.01437.2	R.HQLLKK.-	sp|Q1W0Y2|COX7C_PIG,tr|F1RUH7|F1RUH7_PIG	765.486
0.9919	marcv_X1510_191.01449.01449.2	R.ALEGHER.Q	tr|I3LGG8|I3LGG8_PIG	810.398
0.9767	marcv_X1510_191.01465.01465.2	R.SPSPKPR.G	tr|I3LCW3|I3LCW3_PIG	767.429
0.9204	marcv_X1510_191.01500.01500.2	R.STSPSPSR.L	tr|I3LA25|I3LA25_PIG,tr|F1SKE6|F1SKE6_PIG	817.393
0.9431	marcv_X1510_191.01510.01510.2	K.TVDGPSGK.L	sp|P00355|G3P_PIG	759.376
0.9645	marcv_X1510_191.01521.01521.2	R.TPPPSQGK.G	sp|P81558|MBP_PIG,tr|I3LV79|I3LV79_PIG	810.424
0.9174	marcv_X1510_191.01548.01548.2	K.RPAPGPSR.E	tr|F1RFF8|F1RFF8_PIG	836.462
0.9938	marcv_X1510_191.01550.01550.3	R.KSSTPEEVKK.R	sp|P10668|COF1_PIG,tr|K7GK75|K7GK75_PIG,tr|K7GRM2|K7GRM2_PIG	1131.61
0.9994	marcv_X1510_191.01572.01572.3	K.KADGVKPQTNSTK.N	tr|F1SSH3|F1SSH3_PIG	1372.73
0.9939	marcv_X1510_191.01573.01573.2	K.HSSPMGR.T	tr|F1RJL6|F1RJL6_PIG	770.349
0.9866	marcv_X1510_191.01637.01637.2	K.TPPGSGESGK.S	tr|F1RRS8|F1RRS8_PIG	915.43
0.9928	marcv_X1510_191.01733.01733.2	K.TVDGPSGK.L	sp|P00355|G3P_PIG	759.376
0.9296	marcv_X1510_191.01777.01777.2	K.HIAEDADR.K	sp|P42639|TPM1_PIG,tr|F2Z5B6|F2Z5B6_PIG	925.425
0.9517	marcv_X1510_191.01784.01784.2	K.KVMEEC[160.03]K.R	sp|A5GFS8|VAPB_PIG	922.425
0.9579	marcv_X1510_191.01823.01823.2	R.GHQLLKK.H	tr|F1RUH7|F1RUH7_PIG	822.508
0.9723	marcv_X1510_191.01844.01844.2	K.RTPSEAER.W	tr|I3LAH3|I3LAH3_PIG	944.468
0.9108	marcv_X1510_191.01898.01898.2	K.HIEEVRK.N	sp|Q6DUB7|STMN1_PIG	909.503
0.9998	marcv_X1510_191.01924.01924.3	K.HHENEISHHVK.E	sp|Q29307|ATIF1_PIG	1365.65
0.9642	marcv_X1510_191.01954.01954.2	R.LDDM[147.04]SSR.L	tr|I3LU44|I3LU44_PIG	838.349
0.948	marcv_X1510_191.02322.02322.2	R.AQEREQIK.A	tr|F1SGG7|F1SGG7_PIG,tr|I3LDM6|I3LDM6_PIG	1000.53
0.9799	marcv_X1510_191.02345.02345.2	R.SPGSQGVR.D	tr|F1RGE3|F1RGE3_PIG,tr|I3LS16|I3LS16_PIG	786.398
0.9369	marcv_X1510_191.02367.02367.3	R.RSHYEEGPGK.N	sp|Q1W0Y2|COX7C_PIG	1158.54
0.9731	marcv_X1510_191.02459.02459.2	K.AVVTPGKK.A	tr|I3LRH2|I3LRH2_PIG	798.496
1	marcv_X1510_191.02474.02474.2	R.HLVHSVQK.L	tr|F1RXW1|F1RXW1_PIG	946.535
0.9638	marcv_X1510_191.02536.02536.2	R.REEPSPSR.S	tr|F1RUJ0|F1RUJ0_PIG	956.468
0.9347	marcv_X1510_191.02572.02572.2	K.YVNVKK.G	sp|Q95339|ATPK_PIG,tr|F1REX4|F1REX4_PIG	749.444
0.9798	marcv_X1510_191.02626.02626.2	R.KTQQTDTK.D	DECOY_tr|F1SIP5|F1SIP5_PIG_UNMAPPED	948.488
0.9933	marcv_X1510_191.02638.02638.2	R.M[147.04]LSSC[160.03]C[160.03]K.M	tr|F1RS11|F1RS11_PIG	900.35
0.9604	marcv_X1510_191.02656.02656.2	K.TINDM[147.04]R.A	DECOY_tr|F1RT27|F1RT27_PIG_UNMAPPED	764.349
0.9944	marcv_X1510_191.02677.02677.2	R.APDYKPAHK.G	sp|P81558|MBP_PIG,tr|I3LMX2|I3LMX2_PIG	1025.53
0.9264	marcv_X1510_191.02725.02725.2	K.MHPTPASHPK.K	tr|I3LBS8|I3LBS8_PIG	1101.54
0.9629	marcv_X1510_191.02769.02769.2	R.GREALGGR.E	tr|F1SI65|F1SI65_PIG,tr|I3LDT2|I3LDT2_PIG	814.441
0.9335	marcv_X1510_191.02770.02770.2	R.QEEFRK.L	tr|F1RHZ7|F1RHZ7_PIG	835.419
1	marcv_X1510_191.02782.02782.2	K.ASGAPPGGQQR.Q	tr|B7TY10|B7TY10_PIG,tr|B7TY11|B7TY11_PIG	1024.51
0.9812	marcv_X1510_191.02785.02785.2	D.RPGPPTR.P	tr|F1SH12|F1SH12_PIG	779.44
0.9918	marcv_X1510_191.02786.02786.2	R.SAAETVTK.G	tr|F1SMZ6|F1SMZ6_PIG	805.418
1	marcv_X1510_191.02798.02798.2	R.SHYEEGPGK.N	sp|Q1W0Y2|COX7C_PIG	1002.44
0.9739	marcv_X1510_191.02817.02817.2	R.IDEANQR.A	tr|I3LAV3|I3LAV3_PIG	844.404
0.9588	marcv_X1510_191.02827.02827.2	R.KPPSFKK.I	DECOY_tr|I3LSD2|I3LSD2_PIG_UNMAPPED	830.501
0.997	marcv_X1510_191.02837.02837.2	K.KPDPNIK.N	tr|I3LQU0|I3LQU0_PIG	810.46
0.9425	marcv_X1510_191.02840.02840.2	R.KLEVQAK.R	tr|F1SU30|F1SU30_PIG	814.491
0.9792	marcv_X1510_191.02844.02844.2	K.LAPPPKK.A	tr|F2Z523|F2Z523_PIG	749.48
0.9965	marcv_X1510_191.02852.02852.2	K.RSSSPVTPK.A	tr|K7GNA3|K7GNA3_PIG,tr|F1SQN6|F1SQN6_PIG	957.524
0.9961	marcv_X1510_191.02865.02865.2	R.HPPVSPSSK.T	tr|F1S146|F1S146_PIG	934.487
0.9724	marcv_X1510_191.02877.02877.2	K.IASNVQK.K	tr|F1RXZ6|F1RXZ6_PIG	758.429
0.9125	marcv_X1510_191.02880.02880.2	K.LPEDHR.V	tr|F1RYL9|F1RYL9_PIG,sp|Q2HY40|TXNIP_PIG,tr|F1SPG5|F1SPG5_PIG	765.377
1	marcv_X1510_191.02882.02882.2	R.GNTEAQMSK.A	sp|P80229|ILEU_PIG,tr|F2Z5B1|F2Z5B1_PIG,tr|I3LAV6|I3LAV6_PIG	964.428
0.9208	marcv_X1510_191.02892.02892.2	R.HPPVSPSGK.T	tr|F1S146|F1S146_PIG	904.477
1	marcv_X1510_191.02919.02919.2	K.HTTDLDASK.L	sp|Q29577|KCRU_PIG,tr|F1SI77|F1SI77_PIG	986.467
0.9638	marcv_X1510_191.02922.02922.2	R.HSSLSSPAK.T	tr|F1S146|F1S146_PIG	912.466
0.9971	marcv_X1510_191.02925.02925.2	R.APDYKPAHK.G	sp|P81558|MBP_PIG,tr|I3LMX2|I3LMX2_PIG	1025.53
0.9311	marcv_X1510_191.02930.02930.2	K.RVDIQNK.R	tr|I3LCN6|I3LCN6_PIG	871.488
0.9868	marcv_X1510_191.02933.02933.2	K.HTTDLDASK.L	sp|Q29577|KCRU_PIG,tr|F1SI77|F1SI77_PIG	986.467
0.9942	marcv_X1510_191.02977.02977.2	R.NDEELNK.L	tr|F2Z587|F2Z587_PIG,tr|F2Z575|F2Z575_PIG,tr|F2Z5L2|F2Z5L2_PIG,tr|F1RPK0|F1RPK0_PIG,tr|I3L7T6|I3L7T6_PIG,tr|F1RTQ7|F1RTQ7_PIG,tr|F2Z5L5|F2Z5L5_PIG,tr|F2Z5L6|F2Z5L6_PIG,tr|F1RPL1|F1RPL1_PIG,tr|F2Z5I4|F2Z5I4_PIG,tr|F1RPL3|F1RPL3_PIG	860.388
1	marcv_X1510_191.03056.03056.2	R.SHYEEGPGK.N	sp|Q1W0Y2|COX7C_PIG	1002.44
0.9883	marcv_X1510_191.03071.03071.2	R.ETSLDTK.S	tr|F1RR02|F1RR02_PIG	792.387
0.9975	marcv_X1510_191.03123.03123.2	K.KTFNSVSK.L	tr|F1RR71|F1RR71_PIG,tr|I3L720|I3L720_PIG	909.492
0.995	marcv_X1510_191.03196.03196.2	K.KPVSAKPSSSAPR.L	tr|F1SLI3|F1SLI3_PIG	1310.73
0.9768	marcv_X1510_191.03198.03198.2	K.HARPAELR.L	tr|F1SCH4|F1SCH4_PIG	948.525
1	marcv_X1510_191.03204.03204.3	K.KPVSAKPSSSAPR.L	tr|F1SLI3|F1SLI3_PIG	1310.73
0.9689	marcv_X1510_191.03212.03212.2	K.HIEEVR.K	sp|Q6DUB7|STMN1_PIG,tr|F1SJM1|F1SJM1_PIG	781.408
1	marcv_X1510_191.03285.03285.2	R.SHYEEGPGK.N	sp|Q1W0Y2|COX7C_PIG	1002.44
0.9136	marcv_X1510_191.03303.03303.2	K.RLQGEM[147.04]VK.L	tr|I3L5C0|I3L5C0_PIG	975.517
0.9845	marcv_X1510_191.03306.03306.2	R.RTGEVPGSR.R	tr|F1SIJ0|F1SIJ0_PIG	957.499
0.9534	marcv_X1510_191.03342.03342.3	K.HPPVSPGRTEK.R	tr|F1S146|F1S146_PIG	1203.64
0.9948	marcv_X1510_191.03353.03353.2	R.APDYKPAHK.G	sp|P81558|MBP_PIG,tr|I3LMX2|I3LMX2_PIG	1025.53
0.9936	marcv_X1510_191.03354.03354.2	R.VAGGPAAGSR.Q	tr|K7GSM8|K7GSM8_PIG,tr|K7GMF0|K7GMF0_PIG,tr|K7GRM1|K7GRM1_PIG,tr|K7GRM4|K7GRM4_PIG,tr|F1RQ27|F1RQ27_PIG	841.441
0.9652	marcv_X1510_191.03387.03387.2	K.HEGFER.D	tr|F1RR78|F1RR78_PIG,tr|F1SPM5|F1SPM5_PIG	773.346
1	marcv_X1510_191.03399.03399.2	K.QGVAEAAGK.T	sp|Q3I5G7|SYUA_PIG	829.429
0.9987	marcv_X1510_191.03419.03419.3	R.AEQLAQQAHSNRK.L	sp|P06296|CRF_PIG	1479.75
0.9962	marcv_X1510_191.03461.03461.3	K.ERELEEARK.K	tr|F1SFZ8|F1SFZ8_PIG,tr|I3LDQ1|I3LDQ1_PIG	1158.6
0.9806	marcv_X1510_191.03479.03479.2	R.VHELEQQNK.V	sp|P02547|NFL_PIG,tr|F1RJU4|F1RJU4_PIG	1123.56
1	marcv_X1510_191.03533.03533.2	R.SHYEEGPGK.N	sp|Q1W0Y2|COX7C_PIG	1002.44
1	marcv_X1510_191.03575.03575.2	R.QASQAGPM[147.04]PR.T	tr|B7TY10|B7TY10_PIG,tr|B7TY11|B7TY11_PIG	1057.5
1	marcv_X1510_191.03585.03585.3	K.NRPGSLDKPGK.Q	tr|F1RVJ2|F1RVJ2_PIG	1167.64
0.9977	marcv_X1510_191.03611.03611.2	R.APDYKPAHK.G	sp|P81558|MBP_PIG,tr|I3LMX2|I3LMX2_PIG	1025.53
0.9832	marcv_X1510_191.03616.03616.2	K.KLEAAEER.R	sp|Q6DUB7|STMN1_PIG,tr|F2Z508|F2Z508_PIG,tr|K7GMK4|K7GMK4_PIG,tr|K7GP96|K7GP96_PIG,tr|F1RWM1|F1RWM1_PIG	944.493
0.9958	marcv_X1510_191.03627.03627.2	K.RQTVEQVQK.V	tr|F1SIJ0|F1SIJ0_PIG	1114.61
0.9912	marcv_X1510_191.03629.03629.2	K.GSRPIDTSR.L	tr|I3LMH4|I3LMH4_PIG	987.51
0.9999	marcv_X1510_191.03631.03631.3	K.KAEGAGTEEEGTPK.E	tr|F1SRL9|F1SRL9_PIG	1402.66
0.9745	marcv_X1510_191.03642.03642.2	-.FAFHAGLHAM[147.04]R.S	DECOY_tr|F1RSD2|F1RSD2_PIG_UNMAPPED	1272.62
0.9753	marcv_X1510_191.03651.03651.2	R.TGSQGQC[160.03]TQVR.V	sp|Q6QAT1|RS28_PIG	1220.56
0.9932	marcv_X1510_191.03655.03655.2	R.TPPPGNVK.M	sp|O77735|SCAM1_PIG	808.444
0.9765	marcv_X1510_191.03674.03674.2	K.HPPVSPGR.T	tr|F1S146|F1S146_PIG	845.451
0.9963	marcv_X1510_191.03683.03683.3	K.GKDDPQRETLK.A	sp|Q8WMQ3|CD9_PIG,tr|F1SL24|F1SL24_PIG,tr|K7GMI9|K7GMI9_PIG,tr|I3LPR3|I3LPR3_PIG	1285.66
1	marcv_X1510_191.03684.03684.2	K.GKDDPQRETLK.A	sp|Q8WMQ3|CD9_PIG,tr|F1SL24|F1SL24_PIG,tr|K7GMI9|K7GMI9_PIG,tr|I3LPR3|I3LPR3_PIG	1285.66
0.9785	marcv_X1510_191.03701.03701.2	K.RLTDADAM[147.04]K.Y	sp|P80021|ATPA_PIG,tr|F1RPS8|F1RPS8_PIG	1035.5
0.9905	marcv_X1510_191.03712.03712.2	K.HLLKPDR.N	tr|F1SKF2|F1SKF2_PIG,tr|F1RPJ6|F1RPJ6_PIG	877.513
0.9911	marcv_X1510_191.03722.03722.2	K.RAPDFHDK.Y	tr|K7GMN1|K7GMN1_PIG,tr|K7GRT8|K7GRT8_PIG,tr|K7GN29|K7GN29_PIG,tr|K7GQ77|K7GQ77_PIG	984.478
0.9484	marcv_X1510_191.03735.03735.2	K.LAEQAER.Y	tr|F1SA98|F1SA98_PIG,tr|A5GFP5|A5GFP5_PIG,tr|F1S9F0|F1S9F0_PIG,tr|F1STR9|F1STR9_PIG,tr|F1SDR7|F1SDR7_PIG,tr|F2Z558|F2Z558_PIG,tr|F2Z4Z1|F2Z4Z1_PIG,tr|F2Z4Y1|F2Z4Y1_PIG	815.414
0.9343	marcv_X1510_191.03738.03738.2	K.RAVEYR.L	DECOY_tr|F1SEV4|F1SEV4_PIG_UNMAPPED	792.424
0.9741	marcv_X1510_191.03775.03775.2	K.AAKPSVPK.V	tr|F1SPG1|F1SPG1_PIG	796.481
0.9998	marcv_X1510_191.03792.03792.3	R.LGHAPEAQGGAK.T	tr|F1SIG6|F1SIG6_PIG	1134.58
0.9727	marcv_X1510_191.03797.03797.2	R.M[147.04]QLSGEGAK.T	tr|F1RFX9|F1RFX9_PIG	935.438
0.9948	marcv_X1510_191.03802.03802.2	R.LGHAPEAQGGAK.T	tr|F1SIG6|F1SIG6_PIG	1134.58
0.9573	marcv_X1510_191.03804.03804.2	R.YIQQAR.K	sp|P01356|CCKN_PIG	777.413
0.9673	marcv_X1510_191.03805.03805.2	K.KNPSPIK.D	tr|F1RIW4|F1RIW4_PIG	782.465
0.997	marcv_X1510_191.03827.03827.3	K.TERHPPVSPSSK.T	tr|F1S146|F1S146_PIG	1320.68
0.9918	marcv_X1510_191.03832.03832.2	K.ELSPGSGQK.G	tr|F1SS49|F1SS49_PIG	901.451
0.9666	marcv_X1510_191.03835.03835.2	R.APPGAPEK.Q	tr|F1RW46|F1RW46_PIG,tr|K7GNZ1|K7GNZ1_PIG	765.402
0.9761	marcv_X1510_191.03857.03857.2	K.TRIDEANQR.A	tr|I3LAV3|I3LAV3_PIG	1101.55
0.9995	marcv_X1510_191.03877.03877.3	K.HSPVSPSTKPDR.H	tr|F1S146|F1S146_PIG	1306.66
0.9941	marcv_X1510_191.03886.03886.3	R.HQGVM[147.04]VGM[147.04]GQK.D	sp|Q6QAQ1|ACTB_PIG,sp|P68137|ACTS_PIG,tr|B6VNT8|B6VNT8_PIG,tr|C7AI81|C7AI81_PIG,tr|I3LVD5|I3LVD5_PIG	1202.55
0.9919	marcv_X1510_191.03896.03896.2	K.HATNIMR.S	tr|I3LK60|I3LK60_PIG,tr|F1S778|F1S778_PIG	841.423
0.9149	marcv_X1510_191.03898.03898.2	R.EREQEFQSK.Q	sp|Q9TSV6|VATG2_PIG	1179.55
0.9479	marcv_X1510_191.03899.03899.2	K.HSPVSPSTKPDR.H	tr|F1S146|F1S146_PIG	1306.66
0.9979	marcv_X1510_191.03909.03909.2	R.KPSLVASK.L	sp|Q712U6|ARP19_PIG	828.507
0.9563	marcv_X1510_191.03911.03911.3	R.EREQEFQSK.Q	sp|Q9TSV6|VATG2_PIG	1179.55
0.9171	marcv_X1510_191.03929.03929.2	K.ERFDESGK.G	tr|F1S2I8|F1S2I8_PIG,tr|I3LPE2|I3LPE2_PIG	966.441
0.9885	marcv_X1510_191.03935.03935.2	K.M[147.04]EANIDR.L	tr|I3LJ42|I3LJ42_PIG	863.381
0.9809	marcv_X1510_191.03947.03947.2	K.ETIEQEK.Q	sp|P21753|TYB10_PIG,sp|Q95274|TYB4_PIG,tr|Z4YP56|Z4YP56_PIG	875.424
0.9862	marcv_X1510_191.03960.03960.2	K.HQPPPIR.N	tr|I3LN38|I3LN38_PIG	843.472
0.9441	marcv_X1510_191.03965.03965.2	R.APDYKPAHK.G	sp|P81558|MBP_PIG,tr|I3LMX2|I3LMX2_PIG	1025.53
0.9297	marcv_X1510_191.03977.03977.2	K.M[147.04]SFQSDR.Y	DECOY_tr|F1S374|F1S374_PIG_UNMAPPED	885.365
0.9977	marcv_X1510_191.03981.03981.2	K.HMQEALK.V	tr|F1SI65|F1SI65_PIG,tr|I3LDT2|I3LDT2_PIG	855.427
0.9754	marcv_X1510_191.03992.03992.2	K.VSTLTQK.E	tr|F1SQK1|F1SQK1_PIG	775.444
0.9962	marcv_X1510_191.04010.04010.2	K.DGDGTITTK.E	tr|F2Z5G3|F2Z5G3_PIG,tr|F1S145|F1S145_PIG	906.429
0.9697	marcv_X1510_191.04022.04022.2	R.ATDQLQR.A	tr|I3LHT9|I3LHT9_PIG	830.425
0.9284	marcv_X1510_191.04023.04023.2	R.NPMSDPK.K	tr|F1SUZ2|F1SUZ2_PIG	787.353
0.9185	marcv_X1510_191.04037.04037.2	R.KLQDIR.G	DECOY_tr|F1RK00|F1RK00_PIG_UNMAPPED	771.46
0.9864	marcv_X1510_191.04066.04066.2	K.RC[160.03]QYVTEK.V	tr|F1RJ25|F1RJ25_PIG	1082.52
0.9918	marcv_X1510_191.04067.04067.2	R.ILSSTTSK.V	tr|F1S847|F1S847_PIG	835.465
0.9894	marcv_X1510_191.04084.04084.2	R.QAGPPQATR.Q	tr|B7TY10|B7TY10_PIG,tr|B7TY11|B7TY11_PIG	924.478
0.9388	marcv_X1510_191.04085.04085.2	R.SQGPGGPHPGPR.Q	tr|I3L5R1|I3L5R1_PIG	1142.56
0.9978	marcv_X1510_191.04101.04101.2	R.TPHTPGTPK.S	tr|F1SSS6|F1SSS6_PIG	934.487
0.9842	marcv_X1510_191.04105.04105.2	K.GAVEHTIR.D	tr|F1SGN8|F1SGN8_PIG	881.472
0.9966	marcv_X1510_191.04106.04106.2	K.RLQSEVQR.L	sp|A5GFS8|VAPB_PIG	1014.56
0.998	marcv_X1510_191.04107.04107.3	R.SQGPGGPHPGPR.Q	tr|I3L5R1|I3L5R1_PIG	1142.56
0.9852	marcv_X1510_191.04108.04108.2	K.AAASGIM[147.04]GR.S	tr|F1RP75|F1RP75_PIG	848.417
0.9973	marcv_X1510_191.04120.04120.3	K.EKPPPPPPGGGK.D	tr|F1RZR5|F1RZR5_PIG	1156.62
0.9957	marcv_X1510_191.04144.04144.2	R.KGPPIYK.K	DECOY_tr|F1RXS2|F1RXS2_PIG_UNMAPPED	801.475
1	marcv_X1510_191.04146.04146.2	K.GSELQTQAK.T	tr|F1S1A9|F1S1A9_PIG	960.488
0.9878	marcv_X1510_191.04202.04202.2	K.M[147.04]EANIDR.L	tr|I3LJ42|I3LJ42_PIG	863.381
0.976	marcv_X1510_191.04208.04208.2	R.HLRDEGLR.L	tr|I3L5C0|I3L5C0_PIG	994.531
0.9725	marcv_X1510_191.04210.04210.2	K.AAELQAR.L	tr|I3LJQ7|I3LJQ7_PIG,tr|I3LQS3|I3LQS3_PIG,tr|F1RKR2|F1RKR2_PIG	757.408
0.9655	marcv_X1510_191.04239.04239.3	R.LRSEIDHVKK.Q	tr|F1SGG9|F1SGG9_PIG	1223.7
0.9904	marcv_X1510_191.04268.04268.2	K.AQFEDRN.-	tr|F2Z5F7|F2Z5F7_PIG	878.388
0.9922	marcv_X1510_191.04296.04296.2	K.QVAPEKPVK.K	tr|I3LQI3|I3LQI3_PIG	994.581
0.992	marcv_X1510_191.04368.04368.2	K.NVDENIRK.L	tr|F1SIQ0|F1SIQ0_PIG	986.515
0.9844	marcv_X1510_191.04391.04391.2	K.SMSASGHPIK.V	tr|I3LBZ2|I3LBZ2_PIG	1013.5
0.9954	marcv_X1510_191.04392.04392.2	R.QATYTTTR.L	tr|F1RFX9|F1RFX9_PIG	940.461
0.9852	marcv_X1510_191.04403.04403.2	R.RELEAPK.S	tr|F1SHM3|F1SHM3_PIG	841.466
0.9816	marcv_X1510_191.04404.04404.2	K.RISDLGNK.T	tr|F1S5Y8|F1S5Y8_PIG	901.498
0.9914	marcv_X1510_191.04408.04408.2	K.IQSSPTPASK.K	tr|I3LCF2|I3LCF2_PIG,tr|I3L7B5|I3L7B5_PIG	1014.53
0.9409	marcv_X1510_191.04411.04411.2	R.LFELSELR.E	tr|F1S8D2|F1S8D2_PIG	1005.55
0.9835	marcv_X1510_191.04423.04423.2	K.IKPVSPGTK.A	tr|F1S3A2|F1S3A2_PIG	925.56
0.9876	marcv_X1510_191.04456.04456.2	K.GTNESLER.Q	sp|P02543|VIME_PIG,tr|F1RR02|F1RR02_PIG	904.425
1	marcv_X1510_191.04466.04466.2	K.GEEHC[160.03]GHLIEAHK.E	sp|P81045|COX17_PIG,tr|D2XUP7|D2XUP7_PIG	1515.69
0.9999	marcv_X1510_191.04468.04468.3	K.GEEHC[160.03]GHLIEAHK.E	sp|P81045|COX17_PIG,tr|D2XUP7|D2XUP7_PIG	1515.69
0.9936	marcv_X1510_191.04476.04476.2	R.SC[160.03]NTATC[160.03]MTHR.L	sp|Q862B1|CRSP1_PIG,tr|F1S983|F1S983_PIG	1337.53
0.9999	marcv_X1510_191.04483.04483.3	R.SC[160.03]NTATC[160.03]MTHR.L	sp|Q862B1|CRSP1_PIG,tr|F1S983|F1S983_PIG	1337.53
0.9964	marcv_X1510_191.04491.04491.2	K.QQAPPVR.N	tr|I3LJE2|I3LJE2_PIG	794.44
0.9874	marcv_X1510_191.04510.04510.2	R.RSVGELR.L	tr|F1SSV7|F1SSV7_PIG	815.461
0.9867	marcv_X1510_191.04513.04513.2	R.GANESLER.Q	tr|F1S847|F1S847_PIG	874.414
0.9902	marcv_X1510_191.04515.04515.2	K.RYDVQER.H	tr|F1SIK1|F1SIK1_PIG	964.473
0.9965	marcv_X1510_191.04524.04524.2	R.RAEVLDSTK.S	tr|F1RNZ1|F1RNZ1_PIG	1017.55
0.9897	marcv_X1510_191.04542.04542.2	R.NYDSMK.D	sp|A1XQT2|COX6C_PIG,tr|F1S0P0|F1S0P0_PIG	756.311
0.9912	marcv_X1510_191.04564.04564.3	K.SAHGYIAAHPSSTK.T	tr|I3LB00|I3LB00_PIG	1425.7
0.9286	marcv_X1510_191.04573.04573.2	R.DNELQR.E	tr|I3LIW8|I3LIW8_PIG	773.367
0.999	marcv_X1510_191.04644.04644.3	K.SKPSAASPKPGALK.E	tr|F1SK12|F1SK12_PIG	1337.77
0.9914	marcv_X1510_191.04645.04645.2	R.RTEPASPAVR.A	tr|F1SPS8|F1SPS8_PIG,tr|I3L5R1|I3L5R1_PIG	1082.58
0.9974	marcv_X1510_191.04646.04646.2	K.KPPPLVK.Q	tr|F1SBX0|F1SBX0_PIG,tr|I3LNF0|I3LNF0_PIG,tr|I3LFI1|I3LFI1_PIG	777.511
0.9978	marcv_X1510_191.04674.04674.2	R.SSSLGNSPER.G	sp|Q767K7|ATAT_PIG,tr|K7GRQ5|K7GRQ5_PIG,tr|K7GQ14|K7GQ14_PIG,tr|I3L925|I3L925_PIG,tr|K7GKP0|K7GKP0_PIG,tr|K7GS33|K7GS33_PIG,tr|K7GR62|K7GR62_PIG,tr|K7GNW1|K7GNW1_PIG	1032.48
0.9716	marcv_X1510_191.04688.04688.2	R.LPPSSPQK.L	tr|F1SB03|F1SB03_PIG	852.471
1	marcv_X1510_191.04697.04697.2	K.EDAANNYAR.G	sp|P02550|TBA1A_PIG,sp|Q2XVP4|TBA1B_PIG,tr|F1RK98|F1RK98_PIG,tr|F2Z5S8|F2Z5S8_PIG,tr|F1SHC1|F1SHC1_PIG,tr|F1SR80|F1SR80_PIG,tr|F1SHQ8|F1SHQ8_PIG,tr|F2Z5T5|F2Z5T5_PIG,tr|I3LDR2|I3LDR2_PIG	1022.44
0.9689	marcv_X1510_191.04698.04698.2	R.SPSVSPER.G	tr|I3L5R1|I3L5R1_PIG	857.424
0.9965	marcv_X1510_191.04709.04709.2	K.QASEGPLK.G	sp|P00355|G3P_PIG,tr|F1SLR8|F1SLR8_PIG	828.434
1	marcv_X1510_191.04710.04710.2	K.SPAQPPGPAK.T	tr|F1SBX0|F1SBX0_PIG,tr|F1SBX0|F1SBX0_PIG,tr|I3LNF0|I3LNF0_PIG,tr|I3LNF0|I3LNF0_PIG,tr|I3LFI1|I3LFI1_PIG,tr|I3LFI1|I3LFI1_PIG	948.503
0.9934	marcv_X1510_191.04737.04737.2	R.RAEGTFPGK.L	tr|F1RLH7|F1RLH7_PIG,tr|F1REZ9|F1REZ9_PIG	961.498
0.9268	marcv_X1510_191.04742.04742.2	R.EHLGLVK.V	DECOY_tr|I3L8W4|I3L8W4_PIG_UNMAPPED	794.465
0.9755	marcv_X1510_191.04787.04787.2	R.EDM[147.04]AALEK.D	sp|P02550|TBA1A_PIG,sp|Q2XVP4|TBA1B_PIG,tr|F2Z5S8|F2Z5S8_PIG,tr|F1SHC1|F1SHC1_PIG,tr|F1SR80|F1SR80_PIG,tr|F2Z5T5|F2Z5T5_PIG	921.411
0.9825	marcv_X1510_191.04803.04803.2	M.VHLSAEEK.E	sp|P02067|HBB_PIG,tr|F1RII7|F1RII7_PIG	911.471
1	marcv_X1510_191.04843.04843.3	R.GPHHLDSSSPGPGSETR.G	tr|I3L9R9|I3L9R9_PIG	1716.78
0.976	marcv_X1510_191.04849.04849.2	R.QTSVSGQAPPK.A	tr|B7TY10|B7TY10_PIG,tr|B7TY11|B7TY11_PIG	1098.57
1	marcv_X1510_191.04852.04852.2	K.GAQDAQGTLSK.L	sp|P81558|MBP_PIG,tr|I3LMX2|I3LMX2_PIG	1074.53
1	marcv_X1510_191.04871.04871.3	K.RTTHYGSLPQK.A	tr|I3LMX2|I3LMX2_PIG,sp|P81558|MBP_PIG,tr|I3LV79|I3LV79_PIG	1286.67
0.949	marcv_X1510_191.04875.04875.2	K.VREEYPDR.L	tr|F1S6M7|F1S6M7_PIG	1062.51
0.9691	marcv_X1510_191.04879.04879.2	K.RTTHYGSLPQK.A	tr|I3LMX2|I3LMX2_PIG,sp|P81558|MBP_PIG,tr|I3LV79|I3LV79_PIG	1286.67
0.9988	marcv_X1510_191.04885.04885.3	K.M[147.04]KDTDSEEEIR.E	tr|F2Z5G3|F2Z5G3_PIG	1367.59
0.9755	marcv_X1510_191.04886.04886.2	K.M[147.04]KDTDSEEEIR.E	tr|F2Z5G3|F2Z5G3_PIG	1367.59
0.9368	marcv_X1510_191.04896.04896.2	R.QPAISIK.S	DECOY_tr|F1SU85|F1SU85_PIG_UNMAPPED	755.454
0.9939	marcv_X1510_191.04898.04898.2	K.STSTPTSPGPR.T	tr|I3L9R9|I3L9R9_PIG	1086.53
1	marcv_X1510_191.04920.04920.3	K.KYEDEINKR.T	tr|F1SGG3|F1SGG3_PIG,tr|I3LLY8|I3LLY8_PIG,tr|F1SGG6|F1SGG6_PIG,tr|I3LDM6|I3LDM6_PIG,tr|F1SGG9|F1SGG9_PIG	1193.6
0.943	marcv_X1510_191.04923.04923.2	R.MLSDLLAPHK.A	tr|I3LRL4|I3LRL4_PIG,tr|I3L7R9|I3L7R9_PIG	1123.61
1	marcv_X1510_191.04924.04924.2	R.LPGKPYAAHR.L	sp|Q9GLG4|SCG1_PIG,tr|Q6IYD4|Q6IYD4_PIG	1108.61
0.9944	marcv_X1510_191.04928.04928.2	K.C[160.03]DVDIRK.D	sp|Q6QAQ1|ACTB_PIG,tr|I3LVD5|I3LVD5_PIG	904.444
0.9294	marcv_X1510_191.04939.04939.2	R.WALGNGGSAIHK.I	DECOY_tr|I3LKK5|I3LKK5_PIG_UNMAPPED	1209.63
0.9998	marcv_X1510_191.04948.04948.3	R.AAGTDGSDFQHR.E	tr|F1SQE1|F1SQE1_PIG	1260.55
1	marcv_X1510_191.04949.04949.2	R.AAGTDGSDFQHR.E	tr|F1SQE1|F1SQE1_PIG	1260.55
0.9971	marcv_X1510_191.04951.04951.2	K.YEDEINKR.N	tr|I3LLY8|I3LLY8_PIG,tr|F1SGI7|F1SGI7_PIG,tr|F1SGG3|F1SGG3_PIG,tr|F1SGG6|F1SGG6_PIG,tr|I3LDM6|I3LDM6_PIG,tr|F1SGG9|F1SGG9_PIG	1065.51
0.9979	marcv_X1510_191.04952.04952.2	K.QVHPDTGISSK.A	tr|F2Z584|F2Z584_PIG,tr|F2Z580|F2Z580_PIG,tr|F2Z5L0|F2Z5L0_PIG,tr|I3LE39|I3LE39_PIG,tr|F2Z579|F2Z579_PIG,tr|F1RTQ6|F1RTQ6_PIG,tr|F2Z581|F2Z581_PIG,tr|F1RTQ5|F1RTQ5_PIG,tr|I3LEB6|I3LEB6_PIG,tr|I3LAQ1|I3LAQ1_PIG,tr|I3LL41|I3LL41_PIG,tr|F2Z578|F2Z578_PIG,tr|F1RFJ3|F1RFJ3_PIG,tr|I3LV95|I3LV95_PIG	1167.59
0.9991	marcv_X1510_191.04953.04953.3	K.QVHPDTGISSK.A	tr|F2Z584|F2Z584_PIG,tr|F2Z580|F2Z580_PIG,tr|F2Z5L0|F2Z5L0_PIG,tr|I3LE39|I3LE39_PIG,tr|F2Z579|F2Z579_PIG,tr|F1RTQ6|F1RTQ6_PIG,tr|F2Z581|F2Z581_PIG,tr|F1RTQ5|F1RTQ5_PIG,tr|I3LEB6|I3LEB6_PIG,tr|I3LAQ1|I3LAQ1_PIG,tr|I3LL41|I3LL41_PIG,tr|F2Z578|F2Z578_PIG,tr|F1RFJ3|F1RFJ3_PIG,tr|I3LV95|I3LV95_PIG	1167.59
0.9971	marcv_X1510_191.04954.04954.2	R.SAGQVVDRPEAK.A	tr|I3L6J1|I3L6J1_PIG	1255.65
0.9904	marcv_X1510_191.04960.04960.2	K.QHLLAVK.Y	DECOY_tr|F1SDY9|F1SDY9_PIG_UNMAPPED	807.497
1	marcv_X1510_191.04964.04964.2	K.VTM[147.04]QNLNDR.L	tr|F1RXG2|F1RXG2_PIG,tr|F1S0L1|F1S0L1_PIG,tr|F1RXF9|F1RXF9_PIG,tr|I3LDS3|I3LDS3_PIG,tr|F1RXG1|F1RXG1_PIG	1105.52
0.9973	marcv_X1510_191.04965.04965.2	K.IMHDVIKK.V	tr|F1RS11|F1RS11_PIG	982.563
0.9926	marcv_X1510_191.04967.04967.3	R.SAGQVVDRPEAK.A	tr|I3L6J1|I3L6J1_PIG	1255.65
0.9558	marcv_X1510_191.04977.04977.2	K.EVKPETKPPEPK.K	tr|F1RR71|F1RR71_PIG	1377.75
0.9106	marcv_X1510_191.04991.04991.2	K.RLVNAVGSGK.S	sp|Q5FZP5|SCG2_PIG,tr|I3LUV5|I3LUV5_PIG	999.583
0.9949	marcv_X1510_191.04999.04999.2	K.KYIPGTK.M	sp|P62895|CYC_PIG,tr|F1RHI4|F1RHI4_PIG,tr|I3LCB9|I3LCB9_PIG,tr|I3LNY8|I3LNY8_PIG	805.47
0.9959	marcv_X1510_191.05003.05003.2	R.AEM[147.04]M[147.04]ELNDR.F	tr|F1RR02|F1RR02_PIG	1139.46
0.9266	marcv_X1510_191.05026.05026.2	K.YVEEPR.T	tr|F1SPZ9|F1SPZ9_PIG,tr|I3LBQ4|I3LBQ4_PIG,tr|K7GPW3|K7GPW3_PIG	791.381
0.9805	marcv_X1510_191.05029.05029.2	K.SVMDSM[147.04]K.Q	tr|F1RKM6|F1RKM6_PIG	812.341
0.9831	marcv_X1510_191.05041.05041.2	R.FPNQNQTR.N	tr|F1RLH7|F1RLH7_PIG	1003.48
0.9167	marcv_X1510_191.05044.05044.2	R.QLLAPEVAR.Y	DECOY_tr|I3LGX9|I3LGX9_PIG_UNMAPPED	995.576
0.9979	marcv_X1510_191.05068.05068.2	K.KYEDEINK.R	tr|F1SGG3|F1SGG3_PIG,tr|I3LLY8|I3LLY8_PIG,tr|F1SGG6|F1SGG6_PIG,tr|I3LDM6|I3LDM6_PIG,tr|F1SGG9|F1SGG9_PIG	1037.5
0.958	marcv_X1510_191.05070.05070.3	R.DADLRDPGKPR.N	tr|F1RZW0|F1RZW0_PIG,tr|I3LDI0|I3LDI0_PIG	1238.64
0.992	marcv_X1510_191.05071.05071.2	R.SLPQSPTHR.G	tr|I3LCF2|I3LCF2_PIG,tr|I3L7B5|I3L7B5_PIG	1021.53
0.995	marcv_X1510_191.05078.05078.2	K.RLQGEMVK.L	tr|I3L5C0|I3L5C0_PIG	959.522
0.9897	marcv_X1510_191.05118.05118.2	K.NWM[147.04]SGGGGGR.S	tr|I3LMC3|I3LMC3_PIG,tr|I3LHN3|I3LHN3_PIG	993.409
0.9915	marcv_X1510_191.05120.05120.2	K.TLVSPNK.A	tr|A5GFR8|A5GFR8_PIG	757.433
0.9817	marcv_X1510_191.05130.05130.2	K.GAQDAQGTLSK.L	sp|P81558|MBP_PIG,tr|I3LMX2|I3LMX2_PIG	1074.53
0.999	marcv_X1510_191.05135.05135.3	K.KPVSLGHPGSLKK.G	tr|F1S5C7|F1S5C7_PIG	1346.8
0.9999	marcv_X1510_191.05142.05142.3	K.RTTHYGSLPQK.A	tr|I3LMX2|I3LMX2_PIG,sp|P81558|MBP_PIG,tr|I3LV79|I3LV79_PIG	1286.67
0.9855	marcv_X1510_191.05149.05149.2	K.KPVSLGHPGSLKK.G	tr|F1S5C7|F1S5C7_PIG	1346.8
0.9737	marcv_X1510_191.05197.05197.2	R.QIITQAK.K	tr|A1XQS3|A1XQS3_PIG,tr|F1RK95|F1RK95_PIG	800.476
0.9243	marcv_X1510_191.05200.05200.2	K.ERFEEEAR.L	sp|P08552|NFM_PIG,tr|F1RJU6|F1RJU6_PIG	1064.49
0.9976	marcv_X1510_191.05203.05203.2	K.YLASASTM[147.04]DHAR.H	sp|P81558|MBP_PIG,tr|I3LMX2|I3LMX2_PIG	1337.6
0.9996	marcv_X1510_191.05223.05223.3	K.YLASASTM[147.04]DHAR.H	sp|P81558|MBP_PIG,tr|I3LMX2|I3LMX2_PIG	1337.6
1	marcv_X1510_191.05224.05224.2	K.SPVEEVKPK.A	tr|F1RJU6|F1RJU6_PIG	1011.56
0.9564	marcv_X1510_191.05240.05240.2	R.IVTTHIR.E	tr|F1RRW8|F1RRW8_PIG	838.502
0.9936	marcv_X1510_191.05246.05246.2	R.LAAEDATNEK.Q	sp|P02547|NFL_PIG,tr|F1RJU4|F1RJU4_PIG	1060.5
1	marcv_X1510_191.05268.05268.2	K.GPANATRIPAK.T	tr|F1RRS8|F1RRS8_PIG	1094.62
0.9923	marcv_X1510_191.05273.05273.3	K.RQAVEEM[147.04]MDR.L	tr|F1S4S1|F1S4S1_PIG	1279.56
0.9512	marcv_X1510_191.05295.05295.3	R.TEEREQIKTLNNK.F	tr|F1SGG6|F1SGG6_PIG,tr|F1SGG9|F1SGG9_PIG	1601.84
0.9967	marcv_X1510_191.05311.05311.2	R.FPNQNQTR.N	tr|F1RLH7|F1RLH7_PIG	1003.48
0.9773	marcv_X1510_191.05315.05315.2	K.TINDMR.A	DECOY_tr|F1RT27|F1RT27_PIG_UNMAPPED	748.354
0.9446	marcv_X1510_191.05367.05367.2	-.VLSAADKANVK.A	sp|P01965|HBA_PIG,tr|K7GNR8|K7GNR8_PIG,tr|F1RGX4|F1RGX4_PIG	1114.63
0.996	marcv_X1510_191.05372.05372.2	R.QTALQQEAR.L	tr|F1SNX9|F1SNX9_PIG	1043.54
0.9828	marcv_X1510_191.05380.05380.2	R.QLLAPEVAR.Y	DECOY_tr|I3LGX9|I3LGX9_PIG_UNMAPPED	995.576
1	marcv_X1510_191.05383.05383.2	R.QASQAGPMPR.T	tr|B7TY10|B7TY10_PIG,tr|B7TY11|B7TY11_PIG	1041.5
0.9765	marcv_X1510_191.05394.05394.2	K.ARPSPSVIK.K	tr|F1SU06|F1SU06_PIG	953.566
0.9387	marcv_X1510_191.05425.05425.2	R.YHPQETLK.E	tr|I3LDW7|I3LDW7_PIG,tr|I3LSE3|I3LSE3_PIG	1014.51
0.9958	marcv_X1510_191.05431.05431.2	K.EGVVAAAEK.T	sp|Q3I5G7|SYUA_PIG,tr|A8QW48|A8QW48_PIG	872.46
0.9976	marcv_X1510_191.05435.05435.2	R.SANSNPAMAPR.E	sp|P01168|SMS_PIG,tr|I3LG87|I3LG87_PIG	1114.52
0.989	marcv_X1510_191.05483.05483.2	K.IGSTENLK.H	tr|F1RRS8|F1RRS8_PIG	860.46
0.9663	marcv_X1510_191.05486.05486.2	R.LQLKPR.T	tr|I3LRD5|I3LRD5_PIG,tr|F1RZU8|F1RZU8_PIG,tr|I3L594|I3L594_PIG	753.486
0.9998	marcv_X1510_191.05488.05488.3	K.VLGGGAKPEGGAPR.E	tr|F1RT69|F1RT69_PIG	1264.69
1	marcv_X1510_191.05489.05489.2	K.SC[160.03]C[160.03]SC[160.03]C[160.03]PVGC[160.03]AK.C	sp|P79431|MT1E_PIG,sp|P79379|MT2A_PIG	1444.5
0.9802	marcv_X1510_191.05498.05498.2	K.IREEYPDR.L	sp|Q767L7|TBB5_PIG,sp|P02554|TBB_PIG,tr|F2Z5B2|F2Z5B2_PIG,tr|F2Z571|F2Z571_PIG	1076.53
0.9966	marcv_X1510_191.05499.05499.2	K.VLGGGAKPEGGAPR.E	tr|F1RT69|F1RT69_PIG	1264.69
0.9959	marcv_X1510_191.05511.05511.3	R.LEKPAKYDDIKK.V	sp|P00355|G3P_PIG,tr|F1SLR8|F1SLR8_PIG	1446.81
0.9972	marcv_X1510_191.05512.05512.2	K.KVEPVPVTK.Q	tr|F1SSN5|F1SSN5_PIG	995.602
0.9252	marcv_X1510_191.05523.05523.2	R.FLEQQNK.L	sp|P02543|VIME_PIG,tr|F1SGI3|F1SGI3_PIG,tr|I3LVS6|I3LVS6_PIG,tr|I3LLY8|I3LLY8_PIG,tr|F1RR02|F1RR02_PIG,tr|F1SGI7|F1SGI7_PIG,tr|I3LQN8|I3LQN8_PIG,tr|F1SGG6|F1SGG6_PIG,tr|I3LDM6|I3LDM6_PIG,tr|F1SGI2|F1SGI2_PIG,tr|F1SGG9|F1SGG9_PIG,tr|I3LK01|I3LK01_PIG,tr|I3LJT0|I3LJT0_PIG	905.461
0.9694	marcv_X1510_191.05526.05526.2	K.NKVPELQK.F	tr|F1S4V0|F1S4V0_PIG	954.55
0.9955	marcv_X1510_191.05528.05528.2	R.HAAPLLR.D	tr|F1RTF0|F1RTF0_PIG	776.466
0.9628	marcv_X1510_191.05535.05535.2	R.EIQTAVR.L	tr|F2Z584|F2Z584_PIG,tr|F2Z580|F2Z580_PIG,tr|F2Z5L0|F2Z5L0_PIG,tr|I3LE39|I3LE39_PIG,tr|F2Z579|F2Z579_PIG,tr|F1RTQ6|F1RTQ6_PIG,tr|F2Z581|F2Z581_PIG,tr|F1RTQ5|F1RTQ5_PIG,tr|I3LEB6|I3LEB6_PIG,tr|I3LAQ1|I3LAQ1_PIG,tr|F2Z578|F2Z578_PIG	815.45
0.987	marcv_X1510_191.05536.05536.2	K.NSPLVSR.L	sp|P00346|MDHM_PIG,tr|I3LP41|I3LP41_PIG,tr|I3LB44|I3LB44_PIG	771.424
0.9952	marcv_X1510_191.05575.05575.3	R.ASEPSRIPSNAQEK.K	tr|F1SPS8|F1SPS8_PIG,tr|I3L5R1|I3L5R1_PIG	1512.75
0.9669	marcv_X1510_191.05577.05577.2	K.FC[160.03]C[160.03]EC[160.03]GVRR.M	tr|F1RWM0|F1RWM0_PIG,tr|I3LV68|I3LV68_PIG	1242.51
0.9118	marcv_X1510_191.05584.05584.2	K.ELGTVM[147.04]R.M	sp|P02587|TNNC2_PIG,tr|A1XQV5|A1XQV5_PIG,tr|F2Z5G3|F2Z5G3_PIG	820.411
0.9855	marcv_X1510_191.05589.05589.2	R.TREEIQEVR.S	sp|P29804|ODPA_PIG,tr|K7GMN8|K7GMN8_PIG,tr|I3LCI2|I3LCI2_PIG	1158.6
0.9997	marcv_X1510_191.05590.05590.3	K.YSDIPEGTEC[160.03]HRK.A	tr|I3LGM4|I3LGM4_PIG	1590.71
0.9991	marcv_X1510_191.05601.05601.3	R.TTHYGSLPQK.A	sp|P81558|MBP_PIG,tr|I3LMX2|I3LMX2_PIG,tr|I3LV79|I3LV79_PIG	1130.57
1	marcv_X1510_191.05602.05602.2	K.YSDIPEGTEC[160.03]HRK.A	tr|I3LGM4|I3LGM4_PIG	1590.71
0.9862	marcv_X1510_191.05614.05614.4	K.YSDIPEGTEC[160.03]HRK.A	tr|I3LGM4|I3LGM4_PIG	1590.71
1	marcv_X1510_191.05615.05615.2	K.YHEDFEK.H	tr|F1SHX0|F1SHX0_PIG,tr|I3LT21|I3LT21_PIG,tr|F1RVG6|F1RVG6_PIG	966.408
0.9787	marcv_X1510_191.05618.05618.2	K.YEDEINK.R	tr|I3LLY8|I3LLY8_PIG,tr|F1SGI7|F1SGI7_PIG,tr|F1SGG3|F1SGG3_PIG,tr|F1SGG6|F1SGG6_PIG,tr|I3LDM6|I3LDM6_PIG,tr|F1SGG9|F1SGG9_PIG	909.408
0.9675	marcv_X1510_191.05620.05620.3	R.LRAEIDNVKK.Q	tr|F1SGG6|F1SGG6_PIG	1184.69
1	marcv_X1510_191.05626.05626.2	R.DAVTYTEHAK.R	sp|P62802|H4_PIG	1133.54
0.9934	marcv_X1510_191.05627.05627.3	R.DAVTYTEHAK.R	sp|P62802|H4_PIG	1133.54
0.9964	marcv_X1510_191.05641.05641.2	K.EIRPTYAGSK.S	tr|F1RFL1|F1RFL1_PIG,tr|F1RVM5|F1RVM5_PIG	1120.59
1	marcv_X1510_191.05653.05653.2	K.DGHHAARTTHYGSLPQK.A	sp|P81558|MBP_PIG,tr|I3LV79|I3LV79_PIG	1874.91
0.9842	marcv_X1510_191.05654.05654.2	K.GILSSHPR.Y	tr|F1SE83|F1SE83_PIG	865.477
0.9867	marcv_X1510_191.05672.05672.3	K.HDWDPPDRK.V	sp|P28220|SRBS2_PIG,tr|F1RZN9|F1RZN9_PIG	1164.53
0.9591	marcv_X1510_191.05676.05676.2	R.GPSEEVVR.T	sp|Q2MJV8|PALM_PIG	871.44
0.9545	marcv_X1510_191.05686.05686.2	K.HSDNLFK.R	tr|F1S0L5|F1S0L5_PIG	859.419
0.9724	marcv_X1510_191.05691.05691.2	K.IIAPPERK.Y	sp|Q6QAQ1|ACTB_PIG,sp|P68137|ACTS_PIG,tr|B6VNT8|B6VNT8_PIG,tr|C7AI81|C7AI81_PIG,tr|F1SLG5|F1SLG5_PIG,tr|I3LVD5|I3LVD5_PIG	922.56
0.9898	marcv_X1510_191.05703.05703.2	R.EC[160.03]LAETER.N	tr|F1RFL1|F1RFL1_PIG,tr|F1RVM5|F1RVM5_PIG	1006.44
0.9924	marcv_X1510_191.05708.05708.2	R.AEGTFPGK.L	tr|F1REZ9|F1REZ9_PIG,tr|F1RLH7|F1RLH7_PIG	805.397
0.9635	marcv_X1510_191.05711.05711.2	R.RPLDSPSGPAER.G	sp|P06296|CRF_PIG,tr|K7GQA5|K7GQA5_PIG	1280.65
0.9752	marcv_X1510_191.05720.05720.2	K.NVPATPPR.T	tr|I3LIV1|I3LIV1_PIG	850.466
0.9973	marcv_X1510_191.05725.05725.2	K.HSTPWEM[147.04]K.W	sp|Q35914|ATP8_PIG	1030.45
0.9875	marcv_X1510_191.05736.05736.2	R.RINDEIER.Q	sp|Q2PKF4|GNAQ_PIG	1043.54
0.9999	marcv_X1510_191.05744.05744.3	R.RPLDSPSGPAER.G	sp|P06296|CRF_PIG,tr|K7GQA5|K7GQA5_PIG	1280.65
0.9138	marcv_X1510_191.05759.05759.2	R.GELASVER.N	tr|I3L6F5|I3L6F5_PIG	859.44
0.9923	marcv_X1510_191.05767.05767.2	R.STPSQVTPAEEK.D	tr|F1SI65|F1SI65_PIG,tr|I3LDT2|I3LDT2_PIG	1272.62
0.976	marcv_X1510_191.05777.05777.2	K.RLLDAQER.Q	tr|F1RZR5|F1RZR5_PIG	999.546
0.9979	marcv_X1510_191.05781.05781.2	R.AGVISAPQSHAR.V	tr|F1SHM3|F1SHM3_PIG	1192.63
0.9991	marcv_X1510_191.05783.05783.3	R.AGVISAPQSHAR.V	tr|F1SHM3|F1SHM3_PIG	1192.63
0.9948	marcv_X1510_191.05810.05810.2	K.RLQEETLTK.M	tr|K7GNY3|K7GNY3_PIG,tr|F1RRV9|F1RRV9_PIG,tr|I3LAN7|I3LAN7_PIG	1116.61
0.9377	marcv_X1510_191.05821.05821.2	K.KAVLDQLK.K	tr|I3LM88|I3LM88_PIG	913.56
0.9835	marcv_X1510_191.05834.05834.2	R.KLVEQLK.M	tr|I3LJ42|I3LJ42_PIG,tr|F1SQP0|F1SQP0_PIG,tr|F1RTB6|F1RTB6_PIG	856.538
0.958	marcv_X1510_191.05838.05838.2	R.IQQIAEGEK.V	tr|I3LFS8|I3LFS8_PIG,tr|F1RNA6|F1RNA6_PIG	1014.53
0.9917	marcv_X1510_191.05847.05847.2	K.RITADQALK.H	tr|Q7JFN3|Q7JFN3_PIG,tr|Q7JFN2|Q7JFN2_PIG,tr|Q7JFN4|Q7JFN4_PIG	1014.58
0.9784	marcv_X1510_191.05860.05860.2	R.IVAPPGGR.A	tr|I3LJE2|I3LJE2_PIG,tr|I3LN38|I3LN38_PIG	765.45
1	marcv_X1510_191.05880.05880.2	K.ADDTSAATIEK.K	tr|F1SQ87|F1SQ87_PIG	1120.52
0.9997	marcv_X1510_191.05883.05883.3	R.TTHYGSLPQK.A	sp|P81558|MBP_PIG,tr|I3LMX2|I3LMX2_PIG,tr|I3LV79|I3LV79_PIG	1130.57
0.9936	marcv_X1510_191.05887.05887.2	R.GVVVATGDR.T	tr|F1RGF9|F1RGF9_PIG	872.472
0.9821	marcv_X1510_191.05901.05901.2	K.VVSADAYK.L	tr|F1S0P3|F1S0P3_PIG	851.439
0.9551	marcv_X1510_191.05906.05906.2	R.TESLISR.W	tr|I3LSR7|I3LSR7_PIG,tr|F1S6B1|F1S6B1_PIG,tr|I3LP57|I3LP57_PIG	804.434
0.9811	marcv_X1510_191.05925.05925.2	K.NKYEDEINK.R	tr|I3LLY8|I3LLY8_PIG,tr|F1SGG6|F1SGG6_PIG,tr|F1SGG9|F1SGG9_PIG	1151.55
0.9898	marcv_X1510_191.05926.05926.2	R.SPSTSLPK.R	tr|F1SLI3|F1SLI3_PIG	815.439
0.9906	marcv_X1510_191.05930.05930.2	M.ATSSLTKPQMR.W	sp|A1XQT2|COX6C_PIG,tr|F1S0P0|F1S0P0_PIG	1218.64
1	marcv_X1510_191.05931.05931.3	K.NKYEDEINKR.N	tr|I3LLY8|I3LLY8_PIG,tr|F1SGG6|F1SGG6_PIG,tr|F1SGG9|F1SGG9_PIG	1307.65
1	marcv_X1510_191.05942.05942.2	K.NKYEDEINKR.N	tr|I3LLY8|I3LLY8_PIG,tr|F1SGG6|F1SGG6_PIG,tr|F1SGG9|F1SGG9_PIG	1307.65
0.9999	marcv_X1510_191.05943.05943.3	R.QHC[160.03]C[160.03]PAGYTC[160.03]NVK.A	tr|F1RQZ0|F1RQZ0_PIG	1593.65
1	marcv_X1510_191.05948.05948.2	R.QHC[160.03]C[160.03]PAGYTC[160.03]NVK.A	tr|F1RQZ0|F1RQZ0_PIG	1593.65
0.9999	marcv_X1510_191.05951.05951.3	R.QGPPQKPPGPAGPTR.Q	tr|B7TY10|B7TY10_PIG,tr|B7TY11|B7TY11_PIG	1483.79
1	marcv_X1510_191.05952.05952.2	K.KADQGPLDVK.L	tr|F1SSS6|F1SSS6_PIG	1069.58
0.9939	marcv_X1510_191.05954.05954.2	R.VSETDIQR.L	sp|P01165|7B2_PIG	946.472
0.9978	marcv_X1510_191.05955.05955.2	R.QGPPQKPPGPAGPTR.Q	tr|B7TY10|B7TY10_PIG,tr|B7TY11|B7TY11_PIG	1483.79
0.9928	marcv_X1510_191.05959.05959.2	R.TTHYGSLPQK.A	sp|P81558|MBP_PIG,tr|I3LMX2|I3LMX2_PIG,tr|I3LV79|I3LV79_PIG	1130.57
1	marcv_X1510_191.05962.05962.3	R.RAQFIQHGDAC[160.03]VK.A	sp|P01025|CO3_PIG	1528.76
0.9978	marcv_X1510_191.05979.05979.2	R.AAAPGGPVPR.G	tr|F1S5Z7|F1S5Z7_PIG	891.493
0.9992	marcv_X1510_191.05981.05981.3	R.TM[147.04]VVHEKPDDLGR.G	sp|P04178|SODC_PIG	1511.74
0.9744	marcv_X1510_191.05995.05995.2	K.ALTTPTHYK.L	tr|F1SUZ2|F1SUZ2_PIG	1030.54
0.9672	marcv_X1510_191.05997.05997.2	R.SPTTELSSR.S	tr|F1SIG6|F1SIG6_PIG	976.483
0.9508	marcv_X1510_191.05998.05998.2	R.RELLEAQR.K	tr|F1SUS1|F1SUS1_PIG	1013.56
0.9944	marcv_X1510_191.06004.06004.3	K.LSEENRHLRDEGLR.L	tr|I3L5C0|I3L5C0_PIG	1722.88
0.9758	marcv_X1510_191.06007.06007.2	R.SGKPAELLK.M	tr|A8U4R4|A8U4R4_PIG	941.555
0.9749	marcv_X1510_191.06009.06009.2	K.EVKPNIPK.G	sp|Q95281|RL29_PIG	923.544
0.9966	marcv_X1510_191.06010.06010.2	K.ITKPTIDEK.L	tr|F1SU05|F1SU05_PIG	1043.59
0.9121	marcv_X1510_191.06013.06013.2	K.LSEENRHLRDEGLR.L	tr|I3L5C0|I3L5C0_PIG	1722.88
0.993	marcv_X1510_191.06014.06014.3	K.RMGPGAASGGERPNLK.L	sp|Q06AU7|RAB1B_PIG	1596.82
1	marcv_X1510_191.06040.06040.2	R.SAHAAAVNIASSR.T	tr|I3LCW3|I3LCW3_PIG	1253.65
0.9386	marcv_X1510_191.06041.06041.2	R.YWC[160.03]NDGK.T	sp|P12067|LYSC1_PIG,sp|P12068|LYSC2_PIG,sp|P12069|LYSC3_PIG,tr|K7GNT1|K7GNT1_PIG	941.37
1	marcv_X1510_191.06044.06044.2	K.GLKGAQDAQGTLSK.L	sp|P81558|MBP_PIG,tr|I3LMX2|I3LMX2_PIG	1372.73
0.9998	marcv_X1510_191.06045.06045.3	R.SAHAAAVNIASSR.T	tr|I3LCW3|I3LCW3_PIG	1253.65
0.9584	marcv_X1510_191.06055.06055.2	K.KEYPQK.A	DECOY_tr|F2Z594|F2Z594_PIG_UNMAPPED	791.418
0.9967	marcv_X1510_191.06059.06059.2	K.LVSSVAAQR.L	tr|F1S3D6|F1S3D6_PIG	929.529
0.999	marcv_X1510_191.06062.06062.3	K.KPVSLGHPGSLK.K	tr|F1S5C7|F1S5C7_PIG	1218.71
0.9295	marcv_X1510_191.06063.06063.3	K.KM[147.04]EC[160.03]PFYHPK.H	tr|F1SDY8|F1SDY8_PIG	1351.61
1	marcv_X1510_191.06065.06065.2	K.M[147.04]EANIDRIK.V	tr|I3LJ42|I3LJ42_PIG	1104.56
1	marcv_X1510_191.06069.06069.2	R.LRDDTEAAIR.A	sp|P08552|NFM_PIG,tr|F1RJU6|F1RJU6_PIG	1158.6
1	marcv_X1510_191.06070.06070.2	K.DSYVGDEAQSK.R	sp|Q6QAQ1|ACTB_PIG,sp|P68137|ACTS_PIG,tr|B6VNT8|B6VNT8_PIG,tr|C7AI81|C7AI81_PIG,tr|I3LVD5|I3LVD5_PIG	1197.51
1	marcv_X1510_191.06076.06076.2	K.KPVSLGHPGSLK.K	tr|F1S5C7|F1S5C7_PIG	1218.71
0.9971	marcv_X1510_191.06107.06107.2	R.SAPILEKPK.G	tr|F1RXC5|F1RXC5_PIG	981.586
0.9945	marcv_X1510_191.06133.06133.2	M.AAPTLTAR.L	tr|Q2EN79|Q2EN79_PIG	799.455
0.9997	marcv_X1510_191.06137.06137.3	K.SPSPSPTSPGSLRK.Q	tr|F1RSR2|F1RSR2_PIG	1396.73
0.9482	marcv_X1510_191.06139.06139.2	K.SPSPSPTSPGSLRK.Q	tr|F1RSR2|F1RSR2_PIG	1396.73
0.9967	marcv_X1510_191.06148.06148.2	R.HPFAQAVGR.N	tr|F1S897|F1S897_PIG,tr|I3L8X0|I3L8X0_PIG	981.514
0.9922	marcv_X1510_191.06159.06159.2	R.KLVEQLR.L	tr|I3LKQ1|I3LKQ1_PIG	884.544
0.9164	marcv_X1510_191.06162.06162.2	R.RAISVASR.V	DECOY_tr|F1S5K6|F1S5K6_PIG_UNMAPPED	858.504
0.9846	marcv_X1510_191.06163.06163.2	R.RNVDYLR.Q	DECOY_tr|F1RF72|F1RF72_PIG_UNMAPPED	934.498
0.9664	marcv_X1510_191.06170.06170.2	R.IEAGIER.L	tr|I3LKQ1|I3LKQ1_PIG,tr|F1RZ46|F1RZ46_PIG	786.424
0.9873	marcv_X1510_191.06173.06173.2	R.YALQAM[147.04]K.H	tr|F1SGA9|F1SGA9_PIG	839.421
0.9875	marcv_X1510_191.06174.06174.2	R.EQALAVSR.N	tr|F1RMZ8|F1RMZ8_PIG	872.472
0.9809	marcv_X1510_191.06185.06185.2	K.ELDPVQK.L	sp|P13618|ATP5J_PIG,tr|I3L6G6|I3L6G6_PIG	827.439
1	marcv_X1510_191.06186.06186.2	K.KLFTSTGLKK.L	tr|F1S7W0|F1S7W0_PIG	1121.68
0.9412	marcv_X1510_191.06231.06231.2	R.KDASSFR.C	tr|F1RRW6|F1RRW6_PIG,tr|I3L9R0|I3L9R0_PIG	809.403
0.9847	marcv_X1510_191.06239.06239.3	K.VGGQAGAHGAEALER.M	sp|P01965|HBA_PIG,tr|K7GNR8|K7GNR8_PIG,tr|F1RGX4|F1RGX4_PIG	1421.7
1	marcv_X1510_191.06250.06250.2	K.VGGQAGAHGAEALER.M	sp|P01965|HBA_PIG,tr|K7GNR8|K7GNR8_PIG,tr|F1RGX4|F1RGX4_PIG	1421.7
0.9721	marcv_X1510_191.06269.06269.2	R.LAYIAHPK.L	sp|Q95281|RL29_PIG	911.523
0.9127	marcv_X1510_191.06280.06280.2	K.LGPNDQYK.F	tr|A1XQS3|A1XQS3_PIG	933.456
0.9281	marcv_X1510_191.06289.06289.2	K.VFNDMK.V	sp|P10668|COF1_PIG,sp|Q5G6V9|COF2_PIG,tr|K7GK75|K7GK75_PIG,tr|K7GRM2|K7GRM2_PIG	752.353
0.9979	marcv_X1510_191.06304.06304.2	R.VSGSPSSGFR.S	sp|P08552|NFM_PIG,tr|F1RJU6|F1RJU6_PIG	979.472
0.9622	marcv_X1510_191.06323.06323.2	R.LEEEGQSLK.D	tr|F1RR02|F1RR02_PIG	1031.51
0.9872	marcv_X1510_191.06340.06340.2	K.LDSSDSFK.L	tr|F1S6G0|F1S6G0_PIG	897.408
0.9865	marcv_X1510_191.06357.06357.2	K.LLEGEETR.L	sp|P02547|NFL_PIG,sp|P08552|NFM_PIG,tr|F1S847|F1S847_PIG,tr|F1RJU4|F1RJU4_PIG,tr|F1RJU6|F1RJU6_PIG,tr|I3LJT0|I3LJT0_PIG	945.477
0.9755	marcv_X1510_191.06361.06361.3	K.YVGESEANIRK.L	tr|F1RRS3|F1RRS3_PIG	1264.64
0.9902	marcv_X1510_191.06398.06398.2	K.HSTPWEM[147.04]K.W	sp|Q35914|ATP8_PIG	1030.45
0.9943	marcv_X1510_191.06424.06424.2	R.RSFIC[160.03]R.M	tr|K7GQY6|K7GQY6_PIG,tr|F1RN32|F1RN32_PIG,tr|F1RNZ1|F1RNZ1_PIG,tr|F1RUA0|F1RUA0_PIG,tr|K7GNG1|K7GNG1_PIG,tr|F1SS94|F1SS94_PIG,tr|F1RGB9|F1RGB9_PIG	837.428
1	marcv_X1510_191.06432.06432.2	K.TTPAHLSSSVAPK.S	tr|F1RPC4|F1RPC4_PIG	1294.69
0.9974	marcv_X1510_191.06436.06436.2	K.AAASGIMGR.S	tr|F1RP75|F1RP75_PIG	832.423
0.9959	marcv_X1510_191.06439.06439.3	R.RLDPKEPLASQK.A	tr|I3L5R1|I3L5R1_PIG	1380.77
1	marcv_X1510_191.06446.06446.2	K.KFDDFQK.D	tr|F1RR78|F1RR78_PIG	926.45
0.9946	marcv_X1510_191.06447.06447.3	K.TTPAHLSSSVAPK.S	tr|F1RPC4|F1RPC4_PIG	1294.69
0.9976	marcv_X1510_191.06452.06452.3	K.QKGPQGLGQPSGPSPAK.A	tr|F1SPS8|F1SPS8_PIG	1632.86
0.9761	marcv_X1510_191.06453.06453.2	R.RLDPKEPLASQK.A	tr|I3L5R1|I3L5R1_PIG	1380.77
0.9821	marcv_X1510_191.06458.06458.2	K.LSELDDR.A	tr|F1SSX4|F1SSX4_PIG,tr|F1SL42|F1SL42_PIG,tr|I3LVF9|I3LVF9_PIG	846.408
1	marcv_X1510_191.06459.06459.2	R.KSQTFLPK.L	tr|F1S0P3|F1S0P3_PIG	947.544
0.998	marcv_X1510_191.06482.06482.2	R.SGYSSPGSPGTPGSR.S	tr|F1RRS8|F1RRS8_PIG	1392.63
0.9962	marcv_X1510_191.06498.06498.2	K.LLEGEEC[160.03]R.M	tr|I3LNT6|I3LNT6_PIG,tr|I3L5C4|I3L5C4_PIG,tr|F1RFH3|F1RFH3_PIG,tr|F1SGG7|F1SGG7_PIG,tr|F1SGG4|F1SGG4_PIG,tr|F1SGI7|F1SGI7_PIG,tr|I3LQN8|I3LQN8_PIG,tr|F1SGG6|F1SGG6_PIG,tr|I3LDM6|I3LDM6_PIG,tr|F1SGG9|F1SGG9_PIG	1004.46
0.9791	marcv_X1510_191.06515.06515.2	R.DDFTEER.L	sp|Q007T0|SDHB_PIG,tr|I3LDC1|I3LDC1_PIG	910.367
0.9529	marcv_X1510_191.06518.06518.2	-.QDADVGSNLIK.L	tr|I3LRK8|I3LRK8_PIG	1158.59
0.994	marcv_X1510_191.06528.06528.2	R.FDHFEDR.R	tr|F1S1V1|F1S1V1_PIG	964.404
0.983	marcv_X1510_191.06541.06541.2	K.LPGTTEHLR.F	tr|I3LIT6|I3LIT6_PIG	1022.55
0.9663	marcv_X1510_191.06562.06562.2	K.SEISELRR.T	tr|F1S0L1|F1S0L1_PIG	988.53
0.9975	marcv_X1510_191.06563.06563.2	K.GLSATVTGGQK.G	sp|Q712P7|MYPR_PIG,tr|K7GRJ9|K7GRJ9_PIG	1017.55
0.9556	marcv_X1510_191.06572.06572.2	R.LDC[160.03]AQLK.E	tr|F1S0P3|F1S0P3_PIG	846.427
0.9569	marcv_X1510_191.06591.06591.2	K.TQYQDLR.G	tr|I3L6Z9|I3L6Z9_PIG	922.451
0.9502	marcv_X1510_191.06592.06592.2	R.APGAGAPQVNSK.L	tr|F1RT57|F1RT57_PIG	1095.57
0.934	marcv_X1510_191.06619.06619.2	K.DINPFSK.F	tr|I3LHY2|I3LHY2_PIG,tr|F1S2V5|F1S2V5_PIG	819.413
0.9994	marcv_X1510_191.06649.06649.3	K.YLASASTMDHAR.H	sp|P81558|MBP_PIG,tr|I3LMX2|I3LMX2_PIG	1321.61
0.9999	marcv_X1510_191.06675.06675.3	K.KFGPVVAPKPK.V	tr|F1SRV9|F1SRV9_PIG	1166.72
0.9936	marcv_X1510_191.06687.06687.2	K.TAVAPIER.V	sp|Q6QRN9|ADT3_PIG,tr|F2Z565|F2Z565_PIG,tr|F1RZQ6|F1RZQ6_PIG,tr|F1RRA6|F1RRA6_PIG	855.481
0.9846	marcv_X1510_191.06718.06718.2	K.NVRPDYLK.A	tr|K7GPB0|K7GPB0_PIG,tr|K7GQ61|K7GQ61_PIG,tr|F1SB60|F1SB60_PIG	1003.55
0.9967	marcv_X1510_191.06725.06725.3	K.HIAEVSQEVTR.S	tr|F1RS11|F1RS11_PIG	1267.65
0.9999	marcv_X1510_191.06730.06730.3	K.KLTGGSNWQPK.V	tr|I3LS24|I3LS24_PIG,tr|F1STS9|F1STS9_PIG	1214.64
0.9108	marcv_X1510_191.06734.06734.2	K.HIAEVSQEVTR.S	tr|F1RS11|F1RS11_PIG	1267.65
0.9107	marcv_X1510_191.06737.06737.2	R.TPDRVSETDIQR.L	sp|P01165|7B2_PIG	1415.7
0.9966	marcv_X1510_191.06741.06741.3	R.TPDRVSETDIQR.L	sp|P01165|7B2_PIG	1415.7
0.9954	marcv_X1510_191.06743.06743.2	K.VM[147.04]NLISK.L	tr|F1SRB9|F1SRB9_PIG	819.452
0.9913	marcv_X1510_191.06758.06758.2	R.IQEAGTEVVK.A	sp|P00346|MDHM_PIG,tr|I3LP41|I3LP41_PIG,tr|I3LB44|I3LB44_PIG	1072.58
0.9989	marcv_X1510_191.06768.06768.3	R.RIM[147.04]ILNHPDK.G	tr|F1RJX3|F1RJX3_PIG,tr|F1SGA9|F1SGA9_PIG	1251.68
0.9804	marcv_X1510_191.06781.06781.2	K.SEITELRR.T	tr|I3LDS3|I3LDS3_PIG	1002.55
0.9185	marcv_X1510_191.06789.06789.2	K.QPPQKAQASFPGLR.E	tr|F1RZU8|F1RZU8_PIG	1523.82
0.9601	marcv_X1510_191.06803.06803.5	K.RAHGTPPPVSPKPPPPPTAPKPAK.A	tr|I3LCF2|I3LCF2_PIG,tr|I3L7B5|I3L7B5_PIG	2421.36
0.9776	marcv_X1510_191.06805.06805.2	K.LTGM[147.04]AFR.V	sp|P00355|G3P_PIG,tr|F1SLR8|F1SLR8_PIG,tr|F1RM74|F1RM74_PIG	810.406
0.9999	marcv_X1510_191.06812.06812.3	R.TASRPEDLPHSPSSPGSPK.V	tr|F1RTQ8|F1RTQ8_PIG	1945.95
0.9914	marcv_X1510_191.06818.06818.4	K.HLANLPSSHPVVHQQPAR.S	tr|I3L708|I3L708_PIG,tr|I3L7P3|I3L7P3_PIG,tr|F1RTL6|F1RTL6_PIG	1987.05
0.9998	marcv_X1510_191.06819.06819.3	R.LTPESQSKPAEALK.G	tr|F1SHM3|F1SHM3_PIG	1497.8
0.9932	marcv_X1510_191.06820.06820.2	R.LTPESQSKPAEALK.G	tr|F1SHM3|F1SHM3_PIG	1497.8
0.9999	marcv_X1510_191.06833.06833.3	K.HLANLPSSHPVVHQQPAR.S	tr|I3L708|I3L708_PIG,tr|I3L7P3|I3L7P3_PIG,tr|F1RTL6|F1RTL6_PIG	1987.05
0.9876	marcv_X1510_191.06835.06835.2	R.RPNLPLK.V	tr|F1RPX1|F1RPX1_PIG	836.523
0.9897	marcv_X1510_191.06838.06838.3	K.LTGRDPNDVRPIQAR.L	tr|F1SIQ0|F1SIQ0_PIG	1706.92
0.9937	marcv_X1510_191.06839.06839.5	K.HLANLPSSHPVVHQQPAR.S	tr|I3L708|I3L708_PIG,tr|I3L7P3|I3L7P3_PIG,tr|F1RTL6|F1RTL6_PIG	1987.05
1	marcv_X1510_191.06844.06844.2	K.AGFAGDDAPR.A	sp|Q6QAQ1|ACTB_PIG,sp|P68137|ACTS_PIG,tr|B6VNT8|B6VNT8_PIG,tr|C7AI81|C7AI81_PIG,tr|I3LVD5|I3LVD5_PIG	975.441
0.9691	marcv_X1510_191.06867.06867.4	K.RAHGTPPPVSPKPPPPPTAPKPAK.A	tr|I3LCF2|I3LCF2_PIG,tr|I3L7B5|I3L7B5_PIG	2421.36
0.9458	marcv_X1510_191.06874.06874.2	R.RFGFGER.-	DECOY_tr|F1RZ79|F1RZ79_PIG_UNMAPPED	867.435
1	marcv_X1510_191.06885.06885.3	K.ARPASPQALGGPHGPAPATAK.V	tr|I3LCF2|I3LCF2_PIG,tr|I3L7B5|I3L7B5_PIG	1951.04
0.9606	marcv_X1510_191.06896.06896.4	K.ARPASPQALGGPHGPAPATAK.V	tr|I3LCF2|I3LCF2_PIG,tr|I3L7B5|I3L7B5_PIG	1951.04
0.9948	marcv_X1510_191.06916.06916.3	R.AQFIQHGDAC[160.03]VK.A	sp|P01025|CO3_PIG	1372.66
0.9404	marcv_X1510_191.06923.06923.2	K.SAILVPSEKK.V	tr|F1SSS6|F1SSS6_PIG	1070.63
0.9549	marcv_X1510_191.06924.06924.2	K.NLEVGIRK.K	tr|F1SD77|F1SD77_PIG	927.55
0.9876	marcv_X1510_191.06925.06925.2	R.YSSPLAK.R	tr|F1RQW2|F1RQW2_PIG	764.407
0.987	marcv_X1510_191.06932.06932.2	R.AQFIQHGDAC[160.03]VK.A	sp|P01025|CO3_PIG	1372.66
1	marcv_X1510_191.06934.06934.2	K.GPGDGAEEAEAPSGGPGGR.G	sp|Q29026|CEND_PIG	1666.72
1	marcv_X1510_191.06971.06971.2	K.YEELQQTAGR.H	tr|F1SGG6|F1SGG6_PIG	1193.57
0.9099	marcv_X1510_191.06978.06978.2	R.REEADFYR.V	tr|F1RT88|F1RT88_PIG	1084.49
0.9672	marcv_X1510_191.06979.06979.2	R.AQALLER.D	tr|F1S847|F1S847_PIG	799.455
0.9801	marcv_X1510_191.06985.06985.3	K.RAHGTPPPVSPKPPPPPTAPKPAK.A	tr|I3LCF2|I3LCF2_PIG,tr|I3L7B5|I3L7B5_PIG	2421.36
0.9474	marcv_X1510_191.06987.06987.2	K.VQYLTR.S	sp|P61013|PPLA_PIG	778.434
0.9332	marcv_X1510_191.06989.06989.2	K.YLASASTMDHAR.H	sp|P81558|MBP_PIG,tr|I3LMX2|I3LMX2_PIG	1321.61
0.9719	marcv_X1510_191.07003.07003.2	K.SLQLSDSR.L	tr|F1RJU3|F1RJU3_PIG	904.461
0.9906	marcv_X1510_191.07004.07004.2	R.LNVKPLAR.L	tr|I3LP02|I3LP02_PIG	909.576
0.9972	marcv_X1510_191.07005.07005.2	K.C[160.03]C[160.03]TESLVNR.R	sp|P08835|ALBU_PIG,tr|F1RUN2|F1RUN2_PIG	1137.49
0.9859	marcv_X1510_191.07041.07041.2	R.AQYDELAQK.N	tr|F1SGG1|F1SGG1_PIG	1064.51
1	marcv_X1510_191.07055.07055.2	K.ILPGGAAEQAGK.L	tr|F1SPS8|F1SPS8_PIG,tr|I3L5R1|I3L5R1_PIG	1110.6
0.9999	marcv_X1510_191.07067.07067.3	K.YLASASTMDHAR.H	sp|P81558|MBP_PIG,tr|I3LMX2|I3LMX2_PIG	1321.61
1	marcv_X1510_191.07068.07068.3	K.ASSELM[147.04]SYC[160.03]EQHAR.N	tr|I3LKQ1|I3LKQ1_PIG	1683.7
0.993	marcv_X1510_191.07073.07073.3	R.TMVVHEKPDDLGR.G	sp|P04178|SODC_PIG	1495.75
0.9367	marcv_X1510_191.07093.07093.2	R.TMVVHEKPDDLGR.G	sp|P04178|SODC_PIG	1495.75
1	marcv_X1510_191.07103.07103.2	R.SDSGGSSSEPFER.H	tr|F1RTF0|F1RTF0_PIG	1340.55
0.9338	marcv_X1510_191.07109.07109.2	K.IREEFPDR.L	tr|A5GFX6|A5GFX6_PIG,tr|F2Z5K5|F2Z5K5_PIG,tr|I3LBV1|I3LBV1_PIG,tr|I3L630|I3L630_PIG	1060.53
1	marcv_X1510_191.07119.07119.2	K.ASSELM[147.04]SYC[160.03]EQHAR.N	tr|I3LKQ1|I3LKQ1_PIG	1683.7
0.9927	marcv_X1510_191.07135.07135.2	K.ADIDVSGPK.V	tr|I3L5D5|I3L5D5_PIG	900.455
0.9633	marcv_X1510_191.07175.07175.2	R.VQVTSQEYSAR.L	tr|K7GK71|K7GK71_PIG,tr|K7GL63|K7GL63_PIG,tr|F1SHN1|F1SHN1_PIG	1266.62
0.9179	marcv_X1510_191.07177.07177.2	R.VEQDLAM[147.04]GTDAEGEK.L	tr|F1RS11|F1RS11_PIG	1607.7
0.983	marcv_X1510_191.07190.07190.2	K.STELLIRK.L	sp|Q71LE2|H33_PIG,tr|F2Z5K9|F2Z5K9_PIG,tr|F2Z576|F2Z576_PIG,tr|F1RVA0|F1RVA0_PIG,tr|F1RPL2|F1RPL2_PIG	958.581
0.9479	marcv_X1510_191.07197.07197.4	K.LLHLSSASNHPASSDPR.F	tr|K7GL55|K7GL55_PIG,tr|F1SQP1|F1SQP1_PIG	1787.89
1	marcv_X1510_191.07199.07199.2	K.KLTGGANWQPK.V	tr|F1RQM6|F1RQM6_PIG	1198.65
1	marcv_X1510_191.07202.07202.2	K.RC[160.03]DFPTGVSK.R	tr|K7GNA3|K7GNA3_PIG,tr|F1SQN6|F1SQN6_PIG	1165.55
0.9973	marcv_X1510_191.07204.07204.2	R.VEFM[147.04]DDTSR.S	sp|Q6QAT1|RS28_PIG	1114.46
0.9904	marcv_X1510_191.07205.07205.2	K.LSVNSHFM[147.04]K.D	tr|F1SAB6|F1SAB6_PIG	1077.53
0.9939	marcv_X1510_191.07207.07207.2	K.LLHLSSASNHPASSDPR.F	tr|K7GL55|K7GL55_PIG,tr|F1SQP1|F1SQP1_PIG	1787.89
1	marcv_X1510_191.07210.07210.2	K.GPQGLGQPSGPSPAK.A	tr|F1SPS8|F1SPS8_PIG	1376.7
0.9945	marcv_X1510_191.07239.07239.3	K.LIQNLDANHDGR.L	tr|F2Z5M4|F2Z5M4_PIG,tr|K7GQD4|K7GQD4_PIG,tr|F1RY38|F1RY38_PIG	1364.68
0.9255	marcv_X1510_191.07242.07242.2	R.GISEVLAR.R	tr|F1RF76|F1RF76_PIG	843.481
0.9895	marcv_X1510_191.07249.07249.2	K.FSPVTPK.F	tr|F1SRV9|F1SRV9_PIG	774.428
0.9886	marcv_X1510_191.07250.07250.2	R.ILAPPGGR.S	tr|F1SDQ2|F1SDQ2_PIG	779.465
0.9968	marcv_X1510_191.07251.07251.2	R.M[147.04]PPPLPAR.V	tr|F1RR02|F1RR02_PIG	893.479
0.9756	marcv_X1510_191.07276.07276.2	R.NIVQNYR.A	tr|I3LTQ6|I3LTQ6_PIG	905.472
1	marcv_X1510_191.07295.07295.2	R.GGSAPEGAAYAAPR.G	tr|I3LR67|I3LR67_PIG	1273.61
1	marcv_X1510_191.07314.07314.2	R.FFGADRGAPK.R	sp|P81558|MBP_PIG,tr|I3LMX2|I3LMX2_PIG	1064.54
0.9775	marcv_X1510_191.07328.07328.3	R.RAPSPSLLPASEHK.V	tr|F1RH33|F1RH33_PIG,tr|F1RH34|F1RH34_PIG	1488.8
0.9842	marcv_X1510_191.07331.07331.2	K.IVYPTEK.V	sp|P80171|LASP1_PIG	848.464
0.9973	marcv_X1510_191.07342.07342.2	K.GAAPLPTVSGHR.E	tr|F1SI65|F1SI65_PIG,tr|I3LDT2|I3LDT2_PIG	1161.63
0.9481	marcv_X1510_191.07344.07344.2	K.VDNSSLTGESEPQTR.S	sp|P05024|AT1A1_PIG,sp|D2WKD8|AT1A2_PIG,sp|P19156|ATP4A_PIG,tr|F1RGF9|F1RGF9_PIG,tr|F1RM59|F1RM59_PIG,tr|F1SAX3|F1SAX3_PIG,tr|I3LT88|I3LT88_PIG	1618.74
0.9604	marcv_X1510_191.07359.07359.2	R.GGSPLAAPQGGSPTK.L	tr|I3LR67|I3LR67_PIG	1323.68
0.9789	marcv_X1510_191.07363.07363.2	-.IDPEEMK.E	DECOY_tr|I3LTF6|I3LTF6_PIG_UNMAPPED	860.395
0.9798	marcv_X1510_191.07383.07383.2	K.STTAPGAASPAGVAPSR.V	tr|F1SLI3|F1SLI3_PIG	1496.76
0.998	marcv_X1510_191.07396.07396.3	K.KGDLQWNAGEK.K	tr|F1RQM6|F1RQM6_PIG	1244.61
0.9968	marcv_X1510_191.07397.07397.3	R.C[160.03]LHDIALAHR.A	tr|F1RHU2|F1RHU2_PIG	1204.61
1	marcv_X1510_191.07406.07406.2	K.KGDLQWNAGEK.K	tr|F1RQM6|F1RQM6_PIG	1244.61
0.9982	marcv_X1510_191.07408.07408.3	K.KPPTGPLPPSKEPLK.E	tr|F1RTF0|F1RTF0_PIG	1584.92
0.996	marcv_X1510_191.07418.07418.2	K.AQYEEIANR.S	tr|F1SGG2|F1SGG2_PIG	1092.52
0.9974	marcv_X1510_191.07446.07446.2	K.LFTSTGLKK.L	tr|F1S7W0|F1S7W0_PIG	993.586
0.9988	marcv_X1510_191.07450.07450.3	K.QPSPLAHQPVPR.L	tr|F1RJP9|F1RJP9_PIG	1325.72
0.9972	marcv_X1510_191.07469.07469.2	K.NLQSLDPSHR.L	sp|P01356|CCKN_PIG	1165.58
0.9788	marcv_X1510_191.07475.07475.2	R.DYQELM[147.04]NTK.L	tr|F1SGG3|F1SGG3_PIG	1156.51
1	marcv_X1510_191.07478.07478.2	K.HNM[147.04]DIGTWDNK.G	tr|I3L5J9|I3L5J9_PIG	1345.57
0.9453	marcv_X1510_191.07480.07480.3	K.DQERHVGDLGNVTAGK.D	sp|P04178|SODC_PIG	1694.83
0.9286	marcv_X1510_191.07483.07483.2	R.VAVEQLR.I	DECOY_tr|I3L7Z2|I3L7Z2_PIG_UNMAPPED	813.471
0.9999	marcv_X1510_191.07485.07485.3	K.LTGVLKPGASATGR.-	tr|I3LBI2|I3LBI2_PIG	1326.76
0.9965	marcv_X1510_191.07488.07488.2	K.LTGVLKPGASATGR.-	tr|I3LBI2|I3LBI2_PIG	1326.76
0.9509	marcv_X1510_191.07494.07494.2	R.SRVPELVTK.R	tr|I3LNV3|I3LNV3_PIG	1027.6
0.9813	marcv_X1510_191.07496.07496.2	K.MEANIDRIK.V	tr|I3LJ42|I3LJ42_PIG	1088.56
0.9875	marcv_X1510_191.07497.07497.2	K.NNPEPWNK.L	tr|A1XQS3|A1XQS3_PIG	997.462
0.9937	marcv_X1510_191.07498.07498.2	K.LSSPATLNSR.V	sp|P00761|TRYP_PIG,tr|F1SRS2|F1SRS2_PIG	1044.56
0.9941	marcv_X1510_191.07523.07523.2	K.AQYEEIAQR.S	tr|F1SGG3|F1SGG3_PIG,tr|I3LDM6|I3LDM6_PIG	1106.54
0.9755	marcv_X1510_191.07528.07528.2	R.GRELMGGIGK.T	sp|A1XQR6|ROMO1_PIG,tr|F2Z5I3|F2Z5I3_PIG	1016.54
0.9855	marcv_X1510_191.07533.07533.2	K.RDFGSFEK.F	sp|P28768|SODM_PIG,tr|K7GPB0|K7GPB0_PIG,tr|F1SB60|F1SB60_PIG	984.466
0.9321	marcv_X1510_191.07538.07538.2	R.M[147.04]PPPLPAR.V	tr|F1RR02|F1RR02_PIG	893.479
0.9991	marcv_X1510_191.07548.07548.3	K.NLQSLDPSHR.L	sp|P01356|CCKN_PIG	1165.58
0.9995	marcv_X1510_191.07549.07549.3	R.LTQYIDGQGRPR.T	tr|Q7JFN3|Q7JFN3_PIG,tr|Q7JFN2|Q7JFN2_PIG,tr|Q7JFN4|Q7JFN4_PIG,tr|F1SSH3|F1SSH3_PIG	1402.73
0.9801	marcv_X1510_191.07552.07552.2	R.LPESVER.L	sp|Q767L6|FLOT1_PIG,tr|K7GPJ9|K7GPJ9_PIG	828.434
0.9749	marcv_X1510_191.07553.07553.2	R.LTQYIDGQGRPR.T	tr|Q7JFN3|Q7JFN3_PIG,tr|Q7JFN2|Q7JFN2_PIG,tr|Q7JFN4|Q7JFN4_PIG,tr|F1SSH3|F1SSH3_PIG	1402.73
0.9616	marcv_X1510_191.07554.07554.4	K.GSPGSSQGTPSAGAQPGTSPSPSQPPADQSPHTLRK.V	tr|F1SS49|F1SS49_PIG	3453.65
1	marcv_X1510_191.07578.07578.2	K.DSHLSIVEK.H	tr|F1SSS6|F1SSS6_PIG	1026.53
1	marcv_X1510_191.07581.07581.2	K.SNAPPITPEC[160.03]R.Q	sp|Q9GLG4|SCG1_PIG,tr|Q6IYD4|Q6IYD4_PIG	1240.59
0.9959	marcv_X1510_191.07582.07582.4	R.AHGTPPPVSPKPPPPPTAPKPAK.A	tr|I3LCF2|I3LCF2_PIG,tr|I3L7B5|I3L7B5_PIG	2265.26
0.9749	marcv_X1510_191.07597.07597.2	R.ISVREPM[147.04]QTGIK.A	sp|P80021|ATPA_PIG,tr|F1RPS8|F1RPS8_PIG	1373.73
0.9163	marcv_X1510_191.07603.07603.2	R.KHANIPL.-	sp|P79384|PCCB_PIG	791.465
0.974	marcv_X1510_191.07604.07604.2	R.KLEFGDPK.Q	tr|F1SF94|F1SF94_PIG	932.497
1	marcv_X1510_191.07613.07613.3	R.RADQLADESLESTRR.M	tr|I3LUP5|I3LUP5_PIG,tr|I3LAV3|I3LAV3_PIG	1745.87
1	marcv_X1510_191.07626.07626.2	R.HDEYLEVTK.A	tr|F1SI65|F1SI65_PIG,tr|I3LDT2|I3LDT2_PIG	1132.54
0.9976	marcv_X1510_191.07630.07630.2	K.NIHINPHFK.G	tr|F1SHU7|F1SHU7_PIG,tr|F1SHU8|F1SHU8_PIG	1118.6
0.9905	marcv_X1510_191.07632.07632.2	R.RADQLADESLESTRR.M	tr|I3LUP5|I3LUP5_PIG,tr|I3LAV3|I3LAV3_PIG	1745.87
0.9979	marcv_X1510_191.07639.07639.2	K.HSTPWEMK.W	sp|Q35914|ATP8_PIG	1014.46
0.9778	marcv_X1510_191.07647.07647.2	R.RSTPTPELISK.K	tr|I3LIV1|I3LIV1_PIG	1227.68
0.9948	marcv_X1510_191.07653.07653.2	K.RPSVDSLVSK.F	tr|F1SHE5|F1SHE5_PIG	1086.6
1	marcv_X1510_191.07654.07654.2	K.ALTHLEMR.R	tr|F1RPX1|F1RPX1_PIG	969.507
0.9854	marcv_X1510_191.07668.07668.3	R.TPSLPTPPTREPKK.V	tr|F1RRS8|F1RRS8_PIG	1547.87
0.9764	marcv_X1510_191.07670.07670.2	R.LLEVDNR.V	sp|P50667|COX2_PIG,tr|Q69GF7|Q69GF7_PIG	857.461
0.996	marcv_X1510_191.07677.07677.2	K.GPGVAATSPPPAAAPK.V	tr|F1SM72|F1SM72_PIG,tr|K7GPB6|K7GPB6_PIG	1387.75
0.9961	marcv_X1510_191.07706.07706.2	-.M[147.04]QIFVK.T	sp|P63053|RL40_PIG,sp|P0CG68|UBC_PIG,sp|P0CG68|UBC_PIG,sp|P0CG68|UBC_PIG,sp|P0CG68|UBC_PIG,tr|A7U5U2|A7U5U2_PIG,tr|A7U5U2|A7U5U2_PIG,tr|F2Z5U0|F2Z5U0_PIG	780.42
0.9952	marcv_X1510_191.07717.07717.2	K.AGIFQSAK.-	sp|A1XQT2|COX6C_PIG,tr|F1S0P0|F1S0P0_PIG	820.444
0.9802	marcv_X1510_191.07720.07720.2	R.TLQEQLEK.A	tr|F1SIQ0|F1SIQ0_PIG	987.524
1	marcv_X1510_191.07723.07723.2	K.VEIIANDQGNR.T	sp|Q6S4N2|HS71B_PIG,sp|P34930|HS71A_PIG,sp|A5A8V7|HS71L_PIG,sp|Q04967|HSP76_PIG,tr|F1RS36|F1RS36_PIG,tr|F1SA70|F1SA70_PIG,tr|F1S9Q3|F1S9Q3_PIG,tr|F1S9Q1|F1S9Q1_PIG	1227.62
0.9188	marcv_X1510_191.07760.07760.2	K.AKPTPLDLR.N	tr|F1STW8|F1STW8_PIG	1009.59
0.9995	marcv_X1510_191.07769.07769.3	K.QPQQFPSRPPPPQPK.V	tr|F1RZL4|F1RZL4_PIG	1727.91
0.9827	marcv_X1510_191.07780.07780.2	K.QPQQFPSRPPPPQPK.V	tr|F1RZL4|F1RZL4_PIG	1727.91
1	marcv_X1510_191.07785.07785.3	K.KPNTVSTSHSGSFAPNNPDLAK.A	tr|I3LMS2|I3LMS2_PIG	2268.11
1	marcv_X1510_191.07788.07788.2	K.RQAVEEMMDR.L	tr|F1S4S1|F1S4S1_PIG	1263.57
0.9963	marcv_X1510_191.07789.07789.3	R.SMSDPKPLSPTADESSR.A	tr|F1SBX0|F1SBX0_PIG,tr|I3LNF0|I3LNF0_PIG,tr|I3LFI1|I3LFI1_PIG	1803.83
0.9735	marcv_X1510_191.07795.07795.2	R.LASYLDK.V	tr|F1RXG3|F1RXG3_PIG,tr|F1S0L1|F1S0L1_PIG,tr|I3LDS3|I3LDS3_PIG,tr|F1S0K2|F1S0K2_PIG,tr|I3LHI0|I3LHI0_PIG	808.433
0.9391	marcv_X1510_191.07807.07807.2	R.LPYEIK.A	DECOY_tr|F1RWL6|F1RWL6_PIG_UNMAPPED	761.432
0.9859	marcv_X1510_191.07813.07813.2	R.AIEMYR.Q	tr|F1STF7|F1STF7_PIG,tr|F1SIA1|F1SIA1_PIG	781.379
1	marcv_X1510_191.07824.07824.2	K.AAAGLQSGSASPSPAPSPAR.Q	tr|I3LCF2|I3LCF2_PIG,tr|I3L7B5|I3L7B5_PIG	1778.89
0.9717	marcv_X1510_191.07838.07838.3	K.SRLQTAPGPM[147.04]PDLK.N	tr|F1RRS8|F1RRS8_PIG	1525.79
0.9725	marcv_X1510_191.07845.07845.2	K.SRLQTAPGPM[147.04]PDLK.N	tr|F1RRS8|F1RRS8_PIG	1525.79
1	marcv_X1510_191.07880.07880.3	R.GGPPPPPPPPHSSGPPPPPAR.G	tr|F1SMK2|F1SMK2_PIG	1989.02
0.9934	marcv_X1510_191.07890.07890.2	K.KLAPFSGVK.Q	tr|F1RFN3|F1RFN3_PIG	945.565
1	marcv_X1510_191.07902.07902.2	K.DGGFC[160.03]EVC[160.03]K.R	tr|I3LS26|I3LS26_PIG,tr|F1SU97|F1SU97_PIG	1070.42
0.9986	marcv_X1510_191.07910.07910.3	K.RHPSTLPVISDAR.S	tr|F1RSY8|F1RSY8_PIG	1447.79
0.9916	marcv_X1510_191.07914.07914.2	R.LPESVER.L	sp|Q767L6|FLOT1_PIG,tr|K7GPJ9|K7GPJ9_PIG	828.434
0.9995	marcv_X1510_191.07937.07937.3	K.TKQDVSPAPAPGSVEQLRK.Q	tr|F1SKU2|F1SKU2_PIG	2007.07
0.9995	marcv_X1510_191.07955.07955.3	R.RPPTPGPDAPISGPR.L	tr|F1SA83|F1SA83_PIG	1513.8
0.9966	marcv_X1510_191.07958.07958.3	K.RTAAENEFVTLKK.D	tr|I3LDM6|I3LDM6_PIG	1505.82
1	marcv_X1510_191.07964.07964.2	R.FFGADRGAPK.R	sp|P81558|MBP_PIG,tr|I3LMX2|I3LMX2_PIG	1064.54
0.9858	marcv_X1510_191.07968.07968.2	R.LTTNASAPDLK.N	tr|F1SLI3|F1SLI3_PIG	1129.6
0.9961	marcv_X1510_191.07969.07969.2	K.FAVAEPR.K	sp|A1XQT2|COX6C_PIG,tr|F1S0P0|F1S0P0_PIG	788.418
0.9289	marcv_X1510_191.07970.07970.4	K.KVSKPDLKPFTPEVRK.T	tr|F1SI65|F1SI65_PIG,tr|I3LDT2|I3LDT2_PIG,tr|F1SI64|F1SI64_PIG	1868.09
1	marcv_X1510_191.07981.07981.3	K.AAADLM[147.04]AYC[160.03]EAHAK.E	tr|I3LJ42|I3LJ42_PIG	1536.67
1	marcv_X1510_191.07989.07989.2	K.AAADLM[147.04]AYC[160.03]EAHAK.E	tr|I3LJ42|I3LJ42_PIG	1536.67
0.9966	marcv_X1510_191.07993.07993.2	K.RHPSTLPVISDAR.S	tr|F1RSY8|F1RSY8_PIG	1447.79
0.9872	marcv_X1510_191.08004.08004.3	R.HRDTGILDSLGR.F	tr|I3LMX2|I3LMX2_PIG	1338.7
1	marcv_X1510_191.08016.08016.2	K.KLFTSTGLK.K	tr|F1S7W0|F1S7W0_PIG	993.586
0.9976	marcv_X1510_191.08018.08018.2	R.SQYEQLAEQNR.R	tr|I3LDS3|I3LDS3_PIG	1364.63
1	marcv_X1510_191.08041.08041.2	K.LSSSSTAYDYAGK.N	tr|F1S4V0|F1S4V0_PIG	1348.61
0.9883	marcv_X1510_191.08045.08045.2	K.IPALSPSSGK.S	tr|F1RVJ2|F1RVJ2_PIG	955.534
0.9752	marcv_X1510_191.08056.08056.3	K.NRHPNFLVVEK.D	tr|F1SMN6|F1SMN6_PIG	1351.74
0.9354	marcv_X1510_191.08077.08077.2	R.FARPDFR.D	sp|Q56P28|PRAF3_PIG	907.466
0.9762	marcv_X1510_191.08085.08085.2	R.QPSEEEIIK.L	tr|F2Z523|F2Z523_PIG	1071.54
0.9951	marcv_X1510_191.08100.08100.3	K.RELRPNEEVTWK.-	tr|F1SD73|F1SD73_PIG	1555.81
0.9978	marcv_X1510_191.08104.08104.2	K.NDVNWSQPGEK.K	tr|I3LS24|I3LS24_PIG,tr|F1STS9|F1STS9_PIG	1272.57
0.9975	marcv_X1510_191.08110.08110.2	M.GLLEC[160.03]C[160.03]AR.C	sp|Q712P7|MYPR_PIG,tr|K7GML6|K7GML6_PIG,tr|K7GKB3|K7GKB3_PIG	977.442
0.9427	marcv_X1510_191.08113.08113.2	K.APGRYTESPFEGK.N	tr|F1SK12|F1SK12_PIG	1437.69
0.9759	marcv_X1510_191.08114.08114.2	R.SLGAASPPM[147.04]AEAGTPR.R	tr|I3LEB3|I3LEB3_PIG	1527.74
1	marcv_X1510_191.08117.08117.2	K.RELRPNEEVTWK.-	tr|F1SD73|F1SD73_PIG	1555.81
1	marcv_X1510_191.08118.08118.2	K.KAYADFYR.N	sp|A1XQT2|COX6C_PIG,tr|F1S0P0|F1S0P0_PIG	1032.5
0.966	marcv_X1510_191.08125.08125.4	R.KPAKPPVSPKPILAQPVPK.L	tr|I3LCF2|I3LCF2_PIG,tr|I3L7B5|I3L7B5_PIG	1991.23
0.9991	marcv_X1510_191.08127.08127.3	K.APGRYTESPFEGK.N	tr|F1SK12|F1SK12_PIG	1437.69
0.9993	marcv_X1510_191.08128.08128.3	K.LTEAVSAFGKK.F	tr|F1SPS8|F1SPS8_PIG	1149.64
0.9953	marcv_X1510_191.08129.08129.2	K.LTEAVSAFGKK.F	tr|F1SPS8|F1SPS8_PIG	1149.64
0.9694	marcv_X1510_191.08152.08152.4	K.TLATETRPQPHFPR.T	tr|K7GSS3|K7GSS3_PIG,tr|K7GNQ7|K7GNQ7_PIG,tr|F1RG02|F1RG02_PIG	1649.86
1	marcv_X1510_191.08156.08156.3	R.KPAKPPVSPKPILAQPVPK.L	tr|I3LCF2|I3LCF2_PIG,tr|I3L7B5|I3L7B5_PIG	1991.23
0.9978	marcv_X1510_191.08158.08158.2	R.IEANEALVK.A	tr|F1S6Q7|F1S6Q7_PIG	985.544
0.9855	marcv_X1510_191.08160.08160.2	K.LTGGANWQPK.V	tr|F1RQM6|F1RQM6_PIG	1070.55
0.9987	marcv_X1510_191.08171.08171.3	K.LLLQVQHASK.Q	sp|Q6QRN9|ADT3_PIG,tr|F2Z565|F2Z565_PIG,tr|F1RZQ6|F1RZQ6_PIG	1135.67
0.9972	marcv_X1510_191.08180.08180.2	K.LLLQVQHASK.Q	sp|Q6QRN9|ADT3_PIG,tr|F2Z565|F2Z565_PIG,tr|F1RZQ6|F1RZQ6_PIG	1135.67
0.9951	marcv_X1510_191.08186.08186.2	K.NAKPPYLGSPVK.Y	tr|K7GNA3|K7GNA3_PIG,tr|F1SQN6|F1SQN6_PIG	1269.71
0.9998	marcv_X1510_191.08197.08197.3	K.GIPAPHVGANIKPR.N	tr|F1RWM0|F1RWM0_PIG	1425.82
0.9906	marcv_X1510_191.08201.08201.2	K.AYGENIGYSEK.D	sp|P05027|AT1B1_PIG,tr|J9JIL3|J9JIL3_PIG	1229.56
0.9647	marcv_X1510_191.08204.08204.2	R.ATPPPPPPPTYR.T	tr|I3LIV1|I3LIV1_PIG	1289.68
0.9371	marcv_X1510_191.08211.08211.2	R.GLFGGNTR.L	tr|F1SAT6|F1SAT6_PIG	820.419
0.9942	marcv_X1510_191.08221.08221.2	R.SPGTFPQASAPR.T	tr|F1RMC1|F1RMC1_PIG	1214.6
0.9823	marcv_X1510_191.08223.08223.2	K.GIPAPHVGANIKPR.N	tr|F1RWM0|F1RWM0_PIG	1425.82
0.984	marcv_X1510_191.08226.08226.2	R.VLVLDDTNHER.E	tr|F1S0P3|F1S0P3_PIG	1309.66
0.9861	marcv_X1510_191.08233.08233.2	R.VPPPPPIAR.A	tr|I3LK71|I3LK71_PIG	942.565
0.9837	marcv_X1510_191.08235.08235.2	K.LPVTINK.F	tr|I3LK24|I3LK24_PIG,tr|F1RH60|F1RH60_PIG	783.485
0.9973	marcv_X1510_191.08236.08236.2	K.ALSSALDDTEVKK.V	sp|A5GFS8|VAPB_PIG	1375.72
0.9862	marcv_X1510_191.08245.08245.3	K.ALSSALDDTEVKK.V	sp|A5GFS8|VAPB_PIG	1375.72
0.9999	marcv_X1510_191.08253.08253.3	K.AAADLM[147.04]AYC[160.03]EAHAK.E	tr|I3LJ42|I3LJ42_PIG	1536.67
0.9922	marcv_X1510_191.08254.08254.2	K.GAAM[147.04]VTAVAYR.L	sp|Q1W674|HXK2_PIG,tr|F1SNW8|F1SNW8_PIG,tr|F1SUF2|F1SUF2_PIG	1124.56
0.9794	marcv_X1510_191.08259.08259.3	R.SLSDPKPLSPTAEESAK.E	tr|F1SPS8|F1SPS8_PIG	1755.89
0.992	marcv_X1510_191.08274.08274.2	K.FSM[147.04]PGFK.G	tr|I3L5D5|I3L5D5_PIG,tr|I3L5D5|I3L5D5_PIG,tr|I3L5D5|I3L5D5_PIG	828.384
1	marcv_X1510_191.08285.08285.2	K.ASSELMSYC[160.03]EQHAR.N	tr|I3LKQ1|I3LKQ1_PIG	1667.7
0.9948	marcv_X1510_191.08295.08295.2	R.LAADDFR.T	tr|F1S0J8|F1S0J8_PIG,tr|F1RXG2|F1RXG2_PIG,tr|F1S0L1|F1S0L1_PIG,tr|I3L6B5|I3L6B5_PIG,tr|I3LUM7|I3LUM7_PIG,tr|I3LDS3|I3LDS3_PIG,tr|F1S0K7|F1S0K7_PIG,tr|F1S0K8|F1S0K8_PIG,tr|F1S0K1|F1S0K1_PIG,tr|F1SGG1|F1SGG1_PIG,tr|F1S0K2|F1S0K2_PIG,tr|F1S0K6|F1S0K6_PIG,tr|F1S0K4|F1S0K4_PIG,tr|I3LUJ7|I3LUJ7_PIG,tr|F1RXF8|F1RXF8_PIG	806.392
1	marcv_X1510_191.08297.08297.2	K.AAADLM[147.04]AYC[160.03]EAHAK.E	tr|I3LJ42|I3LJ42_PIG	1536.67
0.9939	marcv_X1510_191.08308.08308.2	R.TITTAYYR.G	sp|Q06AU3|RAB3A_PIG,tr|F1RFW5|F1RFW5_PIG,tr|I3L5L9|I3L5L9_PIG,tr|F1S091|F1S091_PIG,tr|F1S5W6|F1S5W6_PIG,tr|I3LHP6|I3LHP6_PIG,tr|F2Z5I8|F2Z5I8_PIG,tr|F1SLJ0|F1SLJ0_PIG,tr|F1S6G3|F1S6G3_PIG	987.503
0.9977	marcv_X1510_191.08311.08311.2	K.ADIDISGPK.V	tr|I3L5D5|I3L5D5_PIG,tr|I3L5D5|I3L5D5_PIG	914.471
0.9776	marcv_X1510_191.08337.08337.2	K.SQTFLPK.L	tr|F1S0P3|F1S0P3_PIG	819.449
0.9999	marcv_X1510_191.08347.08347.3	K.VVAGVANALAHK.Y	sp|P02067|HBB_PIG,tr|F1RII7|F1RII7_PIG	1148.67
1	marcv_X1510_191.08348.08348.2	K.VVAGVANALAHK.Y	sp|P02067|HBB_PIG,tr|F1RII7|F1RII7_PIG	1148.67
0.9855	marcv_X1510_191.08350.08350.2	K.EVQDFYR.D	sp|Q8WMQ3|CD9_PIG,tr|F1SL24|F1SL24_PIG,tr|K7GMI9|K7GMI9_PIG,tr|I3LPR3|I3LPR3_PIG	955.44
0.9399	marcv_X1510_191.08354.08354.2	R.LTPEEIER.M	sp|P34935|GRP78_PIG,tr|F1RS36|F1RS36_PIG	985.508
0.9955	marcv_X1510_191.08360.08360.2	R.C[160.03]LADAVVK.L	tr|I3LAH2|I3LAH2_PIG	874.458
0.988	marcv_X1510_191.08376.08376.2	K.SLGQIYR.V	tr|F1SFZ2|F1SFZ2_PIG,tr|I3LSQ9|I3LSQ9_PIG	835.455
0.9954	marcv_X1510_191.08378.08378.2	K.TPVIPVK.T	tr|F1RRQ0|F1RRQ0_PIG	752.48
0.9477	marcv_X1510_191.08382.08382.2	K.RPFVESNV.-	tr|F1RRV1|F1RRV1_PIG	946.487
0.98	marcv_X1510_191.08390.08390.2	R.AQILAYK.M	tr|F1SJG5|F1SJG5_PIG	805.47
0.9299	marcv_X1510_191.08403.08403.2	K.LPADLTK.M	tr|F1RKI0|F1RKI0_PIG	756.438
0.981	marcv_X1510_191.08416.08416.2	R.HLAPEVFR.E	tr|F1S4V5|F1S4V5_PIG	967.524
0.9877	marcv_X1510_191.08418.08418.2	R.TDGVPIHLK.R	tr|F1S4V0|F1S4V0_PIG	978.55
1	marcv_X1510_191.08423.08423.3	K.ASSELMSYC[160.03]EQHAR.N	tr|I3LKQ1|I3LKQ1_PIG	1667.7
0.9775	marcv_X1510_191.08456.08456.3	R.SDFGSVDGPPPRPR.W	tr|F1S9I0|F1S9I0_PIG	1482.72
1	marcv_X1510_191.08512.08512.2	R.HSDAVFTDNYTR.L	tr|F1S7X3|F1S7X3_PIG,sp|P01284|VIP_PIG	1424.63
0.9962	marcv_X1510_191.08516.08516.3	R.HSDAVFTDNYTR.L	tr|F1S7X3|F1S7X3_PIG,sp|P01284|VIP_PIG	1424.63
0.9999	marcv_X1510_191.08520.08520.3	K.AAADLM[147.04]AYC[160.03]EAHAK.E	tr|I3LJ42|I3LJ42_PIG	1536.67
0.9939	marcv_X1510_191.08527.08527.2	K.YFDSGDYNM[147.04]AK.A	sp|Q712U6|ARP19_PIG,sp|P68211|ENSA_PIG,tr|F1SS77|F1SS77_PIG	1325.52
0.9998	marcv_X1510_191.08542.08542.3	K.RGLPDQM[147.04]LYR.T	tr|F1S4V0|F1S4V0_PIG	1263.64
0.9945	marcv_X1510_191.08550.08550.2	K.KVPLPGPGSPEVK.R	tr|I3LCF2|I3LCF2_PIG,tr|I3L7B5|I3L7B5_PIG	1303.75
1	marcv_X1510_191.08554.08554.2	K.DGGFC[160.03]EVC[160.03]K.R	tr|I3LS26|I3LS26_PIG,tr|F1SU97|F1SU97_PIG	1070.42
1	marcv_X1510_191.08564.08564.2	K.AAADLM[147.04]AYC[160.03]EAHAK.E	tr|I3LJ42|I3LJ42_PIG	1536.67
0.9962	marcv_X1510_191.08576.08576.3	R.TSLPHFHHPETTRPDSNIYK.K	tr|F1RMC1|F1RMC1_PIG	2376.16
1	marcv_X1510_191.08579.08579.3	K.KVPLPGPGSPEVK.R	tr|I3LCF2|I3LCF2_PIG,tr|I3L7B5|I3L7B5_PIG	1303.75
0.9923	marcv_X1510_191.08584.08584.2	R.LENEIQTYR.S	tr|I3LDS3|I3LDS3_PIG	1164.58
0.9882	marcv_X1510_191.08586.08586.2	K.KAPTNEFYA.-	sp|Q8HZJ6|SDC4_PIG	1039.5
0.9958	marcv_X1510_191.08592.08592.2	K.SAILVPSEK.K	tr|F1SSS6|F1SSS6_PIG	942.539
1	marcv_X1510_191.08619.08619.2	K.RLVSYLDR.N	tr|I3LS26|I3LS26_PIG,tr|F1SU97|F1SU97_PIG	1020.57
0.9878	marcv_X1510_191.08620.08620.2	R.VDPVNFK.F	sp|P02009|HBAZ_PIG,sp|P01965|HBA_PIG,tr|F1RGX7|F1RGX7_PIG,tr|K7GLP2|K7GLP2_PIG,tr|K7GQP8|K7GQP8_PIG,tr|K7GM56|K7GM56_PIG,tr|F1RGX4|F1RGX4_PIG	817.433
0.9997	marcv_X1510_191.08634.08634.3	K.APTPAPRPLLPK.K	tr|F1RS91|F1RS91_PIG,tr|I3LNT4|I3LNT4_PIG	1256.76
1	marcv_X1510_191.08637.08637.2	K.VKGDVDVSLPK.V	tr|I3L5D5|I3L5D5_PIG	1155.65
0.9509	marcv_X1510_191.08638.08638.2	K.LGPELNR.V	DECOY_tr|F1RR63|F1RR63_PIG_UNMAPPED	797.44
0.9549	marcv_X1510_191.08639.08639.2	R.VVGAGSAQGEPSPPK.E	tr|A5GHK9|A5GHK9_PIG,tr|K7GLX3|K7GLX3_PIG	1379.7
1	marcv_X1510_191.08651.08651.2	R.AALIEAGM[147.04]PQGAEDK.-	tr|I3L6C1|I3L6C1_PIG	1515.72
0.9991	marcv_X1510_191.08671.08671.3	K.KPGLTPSPSTTTPLTK.T	tr|F1SBP5|F1SBP5_PIG	1624.9
0.9855	marcv_X1510_191.08673.08673.2	K.APTPAPRPLLPK.K	tr|F1RS91|F1RS91_PIG,tr|I3LNT4|I3LNT4_PIG	1256.76
1	marcv_X1510_191.08678.08678.2	K.LSDSYSNTLPVRK.S	tr|F1RZB0|F1RZB0_PIG	1478.77
0.9839	marcv_X1510_191.08683.08683.2	K.SAFSGGYYR.G	tr|F1SGA9|F1SGA9_PIG	1006.45
0.9972	marcv_X1510_191.08693.08693.2	R.TDGVPIHLK.R	tr|F1S4V0|F1S4V0_PIG	978.55
0.9998	marcv_X1510_191.08694.08694.3	K.ASSELMSYC[160.03]EQHAR.N	tr|I3LKQ1|I3LKQ1_PIG	1667.7
0.9978	marcv_X1510_191.08696.08696.2	K.NYQTAPFDSR.F	tr|F1RLH7|F1RLH7_PIG	1197.54
1	marcv_X1510_191.08701.08701.2	R.MPPPLPAR.V	tr|F1RR02|F1RR02_PIG	877.484
0.9997	marcv_X1510_191.08704.08704.3	K.KPFSGNVIAPPK.F	tr|D7R612|D7R612_PIG	1253.71
0.9666	marcv_X1510_191.08712.08712.2	R.TPSLPTPPTREPK.K	tr|F1RRS8|F1RRS8_PIG	1419.77
0.9961	marcv_X1510_191.08715.08715.3	K.VSKPDLKPFTPEVRK.T	tr|F1SI65|F1SI65_PIG,tr|I3LDT2|I3LDT2_PIG,tr|F1SI64|F1SI64_PIG	1739.99
0.9999	marcv_X1510_191.08717.08717.3	K.KPFSSNVIAPPK.F	tr|F1SC99|F1SC99_PIG	1283.72
0.9918	marcv_X1510_191.08719.08719.2	K.EVQDFYR.D	sp|Q8WMQ3|CD9_PIG,tr|F1SL24|F1SL24_PIG,tr|K7GMI9|K7GMI9_PIG,tr|I3LPR3|I3LPR3_PIG	955.44
1	marcv_X1510_191.08722.08722.2	K.KPFSSNVIAPPK.F	tr|F1SC99|F1SC99_PIG	1283.72
1	marcv_X1510_191.08723.08723.2	K.NSKIEISELNR.V	tr|F1SGG3|F1SGG3_PIG	1301.69
0.9784	marcv_X1510_191.08738.08738.2	R.LASYLDKVR.A	tr|F1RXG3|F1RXG3_PIG,tr|F1S0L1|F1S0L1_PIG,tr|I3LDS3|I3LDS3_PIG,tr|F1S0K2|F1S0K2_PIG,tr|I3LHI0|I3LHI0_PIG	1063.6
1	marcv_X1510_191.08739.08739.2	R.RLNDFASAVR.L	tr|F1SJ34|F1SJ34_PIG	1147.61
0.9172	marcv_X1510_191.08743.08743.3	K.NSKIEISELNR.V	tr|F1SGG3|F1SGG3_PIG	1301.69
0.9994	marcv_X1510_191.08747.08747.3	R.RLNDFASAVR.L	tr|F1SJ34|F1SJ34_PIG	1147.61
1	marcv_X1510_191.08748.08748.2	R.AHLGALLAR.Y	sp|P01356|CCKN_PIG	920.556
0.9857	marcv_X1510_191.08759.08759.2	R.DGRGAAQNIIPASTGAAK.A	sp|P00355|G3P_PIG	1696.89
0.9947	marcv_X1510_191.08761.08761.2	R.VATVSLPR.S	sp|P00761|TRYP_PIG,tr|F1SRS2|F1SRS2_PIG	841.502
0.9905	marcv_X1510_191.08772.08772.2	K.VLETAEDIQER.R	tr|F1RR78|F1RR78_PIG	1301.65
0.9928	marcv_X1510_191.08784.08784.2	K.TLVEFPRK.V	tr|I3LRR4|I3LRR4_PIG	988.571
0.9959	marcv_X1510_191.08785.08785.3	R.AAPRGEAAGAVQELAR.A	tr|I3LEB3|I3LEB3_PIG	1565.83
0.9935	marcv_X1510_191.08788.08788.2	K.EDVLEYK.R	tr|F1RRC9|F1RRC9_PIG	894.433
0.9951	marcv_X1510_191.08790.08790.2	R.GDPGLATIAK.S	tr|F1RR71|F1RR71_PIG	941.518
1	marcv_X1510_191.08793.08793.3	K.TTKPTKPAASDLPVPAEGVR.N	tr|I3L7S4|I3L7S4_PIG,tr|I3L650|I3L650_PIG,tr|F1SNH3|F1SNH3_PIG	2034.11
0.986	marcv_X1510_191.08798.08798.2	K.EEVGQYLK.K	tr|F1SDL0|F1SDL0_PIG	964.487
0.9665	marcv_X1510_191.08800.08800.2	K.QRLQQLFK.G	sp|A1XQS2|TOM7_PIG	1059.62
0.9646	marcv_X1510_191.08801.08801.4	K.KVSKPDLKPFTPEVR.K	tr|F1SI65|F1SI65_PIG,tr|I3LDT2|I3LDT2_PIG,tr|F1SI64|F1SI64_PIG	1739.99
1	marcv_X1510_191.08805.08805.2	K.TREGVVQGVASVAEK.T	tr|A8QW48|A8QW48_PIG	1528.82
0.9976	marcv_X1510_191.08813.08813.2	K.APGFAQM[147.04]LK.E	tr|I3LCA2|I3LCA2_PIG	977.5
0.999	marcv_X1510_191.08815.08815.3	K.TREGVVQGVASVAEK.T	tr|A8QW48|A8QW48_PIG	1528.82
1	marcv_X1510_191.08816.08816.2	R.GYSFTTTAER.E	sp|Q6QAQ1|ACTB_PIG,tr|I3LVD5|I3LVD5_PIG	1131.52
0.9529	marcv_X1510_191.08818.08818.2	K.LEVNIDR.M	tr|I3LM81|I3LM81_PIG	857.461
1	marcv_X1510_191.08820.08820.2	R.HRDTGILDSLGR.F	tr|I3LMX2|I3LMX2_PIG	1338.7
0.9914	marcv_X1510_191.08828.08828.2	K.ATVAPGPWK.V	tr|I3LBI2|I3LBI2_PIG	925.502
0.9281	marcv_X1510_191.08842.08842.2	K.LVAQLYK.L	sp|P00889|CISY_PIG,tr|F1SLZ4|F1SLZ4_PIG,tr|I3LBB3|I3LBB3_PIG	833.501
0.9863	marcv_X1510_191.08846.08846.2	K.SKPIPIMPASPQK.G	tr|F1SGD1|F1SGD1_PIG,tr|I3LR66|I3LR66_PIG,tr|I3LLD7|I3LLD7_PIG	1392.78
1	marcv_X1510_191.08852.08852.2	R.GAAQNIIPASTGAAK.A	sp|P00355|G3P_PIG	1368.74
0.9898	marcv_X1510_191.08857.08857.2	R.QAGLSYIR.Y	tr|A5GFX4|A5GFX4_PIG	906.492
0.9839	marcv_X1510_191.08865.08865.2	K.VMNLISK.L	tr|F1SRB9|F1SRB9_PIG	803.458
0.9997	marcv_X1510_191.08881.08881.3	K.AAADLM[147.04]AYC[160.03]EAHAK.E	tr|I3LJ42|I3LJ42_PIG	1536.67
0.9133	marcv_X1510_191.08895.08895.2	R.HVMLPR.E	tr|F1RN17|F1RN17_PIG	751.416
0.9964	marcv_X1510_191.08906.08906.2	K.SDISPLTPR.E	tr|F1SK12|F1SK12_PIG	984.524
0.974	marcv_X1510_191.08921.08921.2	-.M[147.04]LQSLIK.N	tr|F1S9V7|F1S9V7_PIG	847.484
0.9955	marcv_X1510_191.08925.08925.2	K.RPEADGPGETPGWAPQPK.T	tr|F1RG89|F1RG89_PIG,tr|F1RG88|F1RG88_PIG,tr|F1RG90|F1RG90_PIG	1888.91
0.9946	marcv_X1510_191.08933.08933.3	R.GAAQNIIPASTGAAK.A	sp|P00355|G3P_PIG	1368.74
0.9998	marcv_X1510_191.08935.08935.3	K.QDVSPAPAPGSVEQLRK.Q	tr|F1SKU2|F1SKU2_PIG	1777.93
0.9957	marcv_X1510_191.08936.08936.2	K.GSSGGYGPGAAALQPK.G	tr|F1RXC5|F1RXC5_PIG	1416.7
0.9926	marcv_X1510_191.08953.08953.2	M.GVQVETISPGDGR.T	tr|Q2VTP6|Q2VTP6_PIG	1313.66
0.9354	marcv_X1510_191.08965.08965.2	R.AVLC[160.03]PPPVK.K	tr|I3LFI0|I3LFI0_PIG	979.552
0.9544	marcv_X1510_191.08973.08973.3	R.HRDTGILDSLGR.F	tr|I3LMX2|I3LMX2_PIG	1338.7
0.982	marcv_X1510_191.08990.08990.2	R.AAAAAGTSVKPIFSR.D	tr|F1SRG2|F1SRG2_PIG	1445.8
1	marcv_X1510_191.08994.08994.2	K.QKVDLQSLPTR.A	tr|F2Z5F7|F2Z5F7_PIG	1283.72
0.9972	marcv_X1510_191.09001.09001.2	K.VPTGLLPDHR.K	tr|F1S8C6|F1S8C6_PIG,tr|K7GMY8|K7GMY8_PIG	1103.61
0.9339	marcv_X1510_191.09017.09017.2	K.EFLGTYNK.L	tr|F1SSK4|F1SSK4_PIG	970.476
0.9997	marcv_X1510_191.09023.09023.3	R.HLQLAIRNDEELNK.L	tr|F2Z587|F2Z587_PIG,tr|F2Z575|F2Z575_PIG,tr|F2Z5L2|F2Z5L2_PIG,tr|F1RPK0|F1RPK0_PIG,tr|I3L7T6|I3L7T6_PIG,tr|F1RTQ7|F1RTQ7_PIG,tr|F2Z5L5|F2Z5L5_PIG,tr|F1RPL1|F1RPL1_PIG,tr|F2Z5I4|F2Z5I4_PIG,tr|F1RPL3|F1RPL3_PIG	1691.9
0.9999	marcv_X1510_191.09027.09027.3	K.RPNPC[160.03]AYTPPSLK.A	sp|Q29277|PPR1B_PIG,tr|F1RWM4|F1RWM4_PIG	1499.76
0.9946	marcv_X1510_191.09033.09033.2	R.VATVSLPR.S	sp|P00761|TRYP_PIG,tr|F1SRS2|F1SRS2_PIG	841.502
0.9918	marcv_X1510_191.09039.09039.2	K.AGAGSATLSM[147.04]AYAGAR.F	sp|P00346|MDHM_PIG,tr|I3LP41|I3LP41_PIG,tr|I3LB44|I3LB44_PIG	1469.69
1	marcv_X1510_191.09043.09043.2	R.LDHKFDLM[147.04]YAK.R	sp|P02550|TBA1A_PIG,sp|Q2XVP4|TBA1B_PIG,tr|F1RK98|F1RK98_PIG,tr|F2Z5S8|F2Z5S8_PIG,tr|F1SHC1|F1SHC1_PIG,tr|F1SR80|F1SR80_PIG,tr|F1SHQ8|F1SHQ8_PIG,tr|F2Z5T5|F2Z5T5_PIG,tr|I3LDR2|I3LDR2_PIG	1395.69
0.9999	marcv_X1510_191.09052.09052.3	K.VNPFRPGDGEPPAAAGAQR.A	tr|F1SRV9|F1SRV9_PIG	1905.94
1	marcv_X1510_191.09054.09054.2	R.TPTASAVNLAGAR.T	tr|I3LCW3|I3LCW3_PIG	1227.66
1	marcv_X1510_191.09064.09064.2	R.GEAAGAVQELAR.A	tr|I3LEB3|I3LEB3_PIG	1170.6
0.9931	marcv_X1510_191.09076.09076.2	K.DFGLGQR.A	tr|I3LIV1|I3LIV1_PIG	791.393
0.9907	marcv_X1510_191.09077.09077.2	K.VKPPLITVR.A	tr|F1RPX1|F1RPX1_PIG	1021.66
0.9947	marcv_X1510_191.09083.09083.2	K.AALVSPPGPPTK.G	tr|F1SIG6|F1SIG6_PIG	1133.64
1	marcv_X1510_191.09104.09104.2	R.HRDTGILDSLGR.F	tr|I3LMX2|I3LMX2_PIG	1338.7
0.994	marcv_X1510_191.09114.09114.2	R.HYINLITR.Q	sp|P01304|NPY_PIG,tr|F1ST92|F1ST92_PIG	1028.58
0.9707	marcv_X1510_191.09116.09116.2	K.VAFSAIR.S	sp|P63181|CBLN1_PIG	762.439
0.9539	marcv_X1510_191.09133.09133.2	R.VGELFQR.E	tr|F1S847|F1S847_PIG	847.455
0.9983	marcv_X1510_191.09157.09157.3	R.LHISQLQHENSVLK.G	tr|F1SNT8|F1SNT8_PIG	1644.89
0.9815	marcv_X1510_191.09163.09163.2	R.HVMLPR.E	tr|F1RN17|F1RN17_PIG	751.416
0.9726	marcv_X1510_191.09182.09182.2	R.YDLLEK.N	sp|P16276|ACON_PIG,tr|F1SRC5|F1SRC5_PIG,tr|I3LP68|I3LP68_PIG	779.407
0.9931	marcv_X1510_191.09183.09183.2	K.LTGMAFR.V	sp|P00355|G3P_PIG,tr|F1SLR8|F1SLR8_PIG,tr|F1RM74|F1RM74_PIG	794.411
0.9945	marcv_X1510_191.09186.09186.2	R.EPPHGSPDWLK.V	tr|F1RRC9|F1RRC9_PIG	1261.61
0.9251	marcv_X1510_191.09191.09191.2	R.LQQLFK.G	sp|A1XQS2|TOM7_PIG,tr|Q00P49|Q00P49_PIG,tr|F1SHC3|F1SHC3_PIG,tr|I3LTW9|I3LTW9_PIG	775.459
0.9855	marcv_X1510_191.09192.09192.2	R.QM[147.04]SLLLR.R	sp|P80021|ATPA_PIG,tr|F1RPS8|F1RPS8_PIG	875.49
0.9906	marcv_X1510_191.09200.09200.3	K.HRPDLIDFDK.L	tr|F1SA60|F1SA60_PIG	1254.64
0.9868	marcv_X1510_191.09201.09201.3	R.EPPHGSPDWLK.V	tr|F1RRC9|F1RRC9_PIG	1261.61
0.96	marcv_X1510_191.09216.09216.2	K.HFSPEEIAVK.V	tr|F1RM62|F1RM62_PIG,tr|I3LIP0|I3LIP0_PIG	1155.59
1	marcv_X1510_191.09224.09224.2	R.VTQSNFAVGYK.T	sp|Q9MZ16|VDAC1_PIG	1212.61
0.9863	marcv_X1510_191.09229.09229.3	K.FSRPLLPATTTK.L	tr|I3L6H3|I3L6H3_PIG	1330.76
0.9714	marcv_X1510_191.09232.09232.2	K.HRPDLIDFDK.L	tr|F1SA60|F1SA60_PIG	1254.64
0.9991	marcv_X1510_191.09237.09237.3	K.RLVSYLDRNLEK.N	tr|I3LS26|I3LS26_PIG,tr|F1SU97|F1SU97_PIG	1504.84
1	marcv_X1510_191.09245.09245.3	R.HRDTGILDSLGR.F	tr|I3LMX2|I3LMX2_PIG	1338.7
0.9799	marcv_X1510_191.09249.09249.2	R.SLSPIIGK.D	tr|F1S485|F1S485_PIG	813.496
1	marcv_X1510_191.09261.09261.2	K.HNMDIGTWDNK.G	tr|I3L5J9|I3L5J9_PIG	1329.58
0.9139	marcv_X1510_191.09279.09279.2	R.YNLQSALR.S	tr|F1S1H0|F1S1H0_PIG	963.514
0.9775	marcv_X1510_191.09282.09282.3	K.TQIDHYVGIAR.D	tr|F1RPY3|F1RPY3_PIG	1271.66
1	marcv_X1510_191.09288.09288.2	K.TQIDHYVGIAR.D	tr|F1RPY3|F1RPY3_PIG	1271.66
0.9862	marcv_X1510_191.09298.09298.2	R.KLVEQLKM[147.04]EANIDR.L	tr|I3LJ42|I3LJ42_PIG	1701.91
0.9997	marcv_X1510_191.09300.09300.3	R.KLVEQLKM[147.04]EANIDR.L	tr|I3LJ42|I3LJ42_PIG	1701.91
1	marcv_X1510_191.09313.09313.3	K.SGQKPVLSDVHAELDR.L	tr|F1RRE0|F1RRE0_PIG	1749.9
0.9755	marcv_X1510_191.09336.09336.3	K.AAADLM[147.04]AYC[160.03]EAHAK.E	tr|I3LJ42|I3LJ42_PIG	1536.67
0.9998	marcv_X1510_191.09348.09348.3	R.FPGQLNADLRK.L	sp|Q767L7|TBB5_PIG,sp|P02554|TBB_PIG,tr|A5GFX6|A5GFX6_PIG,tr|F2Z5K5|F2Z5K5_PIG,tr|F1S6M7|F1S6M7_PIG,tr|F2Z5B2|F2Z5B2_PIG,tr|I3LBV1|I3LBV1_PIG,tr|F2Z571|F2Z571_PIG	1257.68
1	marcv_X1510_191.09350.09350.2	R.FPGQLNADLRK.L	sp|Q767L7|TBB5_PIG,sp|P02554|TBB_PIG,tr|A5GFX6|A5GFX6_PIG,tr|F2Z5K5|F2Z5K5_PIG,tr|F1S6M7|F1S6M7_PIG,tr|F2Z5B2|F2Z5B2_PIG,tr|I3LBV1|I3LBV1_PIG,tr|F2Z571|F2Z571_PIG	1257.68
0.9962	marcv_X1510_191.09351.09351.2	R.TIAM[147.04]DGTEGLVR.G	tr|F1SLA0|F1SLA0_PIG,tr|K7GLT8|K7GLT8_PIG	1277.63
0.9576	marcv_X1510_191.09358.09358.3	K.DRGGGIPELPK.D	tr|F1SUM1|F1SUM1_PIG	1137.61
0.9965	marcv_X1510_191.09364.09364.2	K.AYADFYR.N	sp|A1XQT2|COX6C_PIG,tr|F1S0P0|F1S0P0_PIG	904.408
1	marcv_X1510_191.09371.09371.2	R.HRDTGILDSLGR.F	tr|I3LMX2|I3LMX2_PIG	1338.7
0.983	marcv_X1510_191.09388.09388.4	K.AQHGRPQDENPVVHFFK.N	sp|P81558|MBP_PIG,tr|I3LMX2|I3LMX2_PIG,tr|I3LV79|I3LV79_PIG	2004.99
0.9907	marcv_X1510_191.09390.09390.2	K.QVFQSLPK.S	tr|F1SGA9|F1SGA9_PIG	945.528
1	marcv_X1510_191.09391.09391.2	K.TSASIGSLC[160.03]ADAR.M	sp|Q712P7|MYPR_PIG,tr|K7GML6|K7GML6_PIG	1307.61
0.991	marcv_X1510_191.09395.09395.2	R.ALAHLLEAER.Q	tr|I3LEB3|I3LEB3_PIG	1121.62
0.9865	marcv_X1510_191.09402.09402.2	K.STELLIR.K	sp|Q71LE2|H33_PIG,tr|F2Z5K9|F2Z5K9_PIG,tr|F2Z576|F2Z576_PIG,tr|F1RVA0|F1RVA0_PIG,tr|F1RPL2|F1RPL2_PIG	830.486
0.9102	marcv_X1510_191.09406.09406.2	R.AELLESLR.A	tr|F1SUY4|F1SUY4_PIG	929.518
1	marcv_X1510_191.09417.09417.3	K.YRPPPQTNLLAPK.L	tr|F1RJS6|F1RJS6_PIG,tr|K7GLY6|K7GLY6_PIG	1493.84
0.9737	marcv_X1510_191.09419.09419.2	K.YLEC[160.03]SALTQR.G	tr|I3LKU0|I3LKU0_PIG,tr|I3LFI0|I3LFI0_PIG	1239.59
0.928	marcv_X1510_191.09425.09425.5	K.AQHGRPQDENPVVHFFK.N	sp|P81558|MBP_PIG,tr|I3LMX2|I3LMX2_PIG,tr|I3LV79|I3LV79_PIG	2004.99
0.9968	marcv_X1510_191.09427.09427.2	R.QSVEADINGLRR.V	tr|I3LDS3|I3LDS3_PIG,tr|F1S0K1|F1S0K1_PIG	1356.71
0.989	marcv_X1510_191.09428.09428.2	R.LVDVIC[160.03]EK.M	sp|Q06AU3|RAB3A_PIG	974.511
0.9691	marcv_X1510_191.09429.09429.2	R.AEGTFPGKI.-	tr|F1REZ9|F1REZ9_PIG,tr|F1RLH7|F1RLH7_PIG	918.481
1	marcv_X1510_191.09430.09430.2	K.AQHGRPQDENPVVHFFK.N	sp|P81558|MBP_PIG,tr|I3LMX2|I3LMX2_PIG,tr|I3LV79|I3LV79_PIG	2004.99
0.9919	marcv_X1510_191.09453.09453.2	R.LNDFASAVR.L	tr|F1SJ34|F1SJ34_PIG	991.509
1	marcv_X1510_191.09457.09457.2	K.VDEAVAVLQAHQAK.E	tr|F2Z557|F2Z557_PIG,tr|I3LS00|I3LS00_PIG	1477.79
0.9895	marcv_X1510_191.09464.09464.3	K.RKGPELPLVPVK.R	tr|F1SVA6|F1SVA6_PIG	1331.83
1	marcv_X1510_191.09478.09478.2	K.RISGLIYEETR.G	sp|P62802|H4_PIG	1335.71
0.9829	marcv_X1510_191.09490.09490.2	K.GAPAFQLNR.L	tr|F1SLT0|F1SLT0_PIG	972.514
0.9955	marcv_X1510_191.09500.09500.2	K.FILKPAIK.Y	tr|F1SSS6|F1SSS6_PIG	928.611
1	marcv_X1510_191.09507.09507.3	R.HRDTGILDSLGR.F	tr|I3LMX2|I3LMX2_PIG	1338.7
1	marcv_X1510_191.09511.09511.2	K.LTEAVSAFGK.K	tr|F1SPS8|F1SPS8_PIG	1021.54
0.992	marcv_X1510_191.09514.09514.2	K.DITAALAAERK.F	tr|F1RRW8|F1RRW8_PIG,tr|I3LCZ7|I3LCZ7_PIG	1157.64
1	marcv_X1510_191.09526.09526.2	K.EVQDFYRDTYNK.L	sp|Q8WMQ3|CD9_PIG,tr|F1SL24|F1SL24_PIG,tr|K7GMI9|K7GMI9_PIG,tr|I3LPR3|I3LPR3_PIG	1576.72
1	marcv_X1510_191.09549.09549.2	K.AVANQTSATFLR.V	tr|F2Z5J1|F2Z5J1_PIG	1277.67
1	marcv_X1510_191.09555.09555.2	K.TQEQLTPLVK.K	tr|F1S1A9|F1S1A9_PIG	1155.65
1	marcv_X1510_191.09566.09566.2	K.LRVDPVNFK.L	sp|P01965|HBA_PIG,sp|P02009|HBAZ_PIG,tr|F1RGX7|F1RGX7_PIG,tr|K7GLP2|K7GLP2_PIG,tr|K7GQP8|K7GQP8_PIG,tr|K7GM56|K7GM56_PIG,tr|F1RGX4|F1RGX4_PIG	1086.62
0.9558	marcv_X1510_191.09595.09595.3	K.SRLQTAPGPMPDLK.N	tr|F1RRS8|F1RRS8_PIG	1509.8
0.9902	marcv_X1510_191.09599.09599.3	K.RPTPGSSDPLIKPSSPAVC[160.03]PEPSSSPK.R	tr|F1RRS8|F1RRS8_PIG	2774.39
0.9984	marcv_X1510_191.09614.09614.3	R.FPGQLNADLRK.L	sp|Q767L7|TBB5_PIG,sp|P02554|TBB_PIG,tr|A5GFX6|A5GFX6_PIG,tr|F2Z5K5|F2Z5K5_PIG,tr|F1S6M7|F1S6M7_PIG,tr|F2Z5B2|F2Z5B2_PIG,tr|I3LBV1|I3LBV1_PIG,tr|F2Z571|F2Z571_PIG	1257.68
0.995	marcv_X1510_191.09629.09629.2	K.AYADFYR.N	sp|A1XQT2|COX6C_PIG,tr|F1S0P0|F1S0P0_PIG	904.408
0.996	marcv_X1510_191.09638.09638.2	K.AIIKPVIIDK.D	tr|I3LNF8|I3LNF8_PIG	1108.72
0.9615	marcv_X1510_191.09641.09641.2	K.FIEIAAR.K	tr|F1S8L9|F1S8L9_PIG	818.465
0.9883	marcv_X1510_191.09646.09646.4	K.AQHGRPQDENPVVHFFK.N	sp|P81558|MBP_PIG,tr|I3LMX2|I3LMX2_PIG,tr|I3LV79|I3LV79_PIG	2004.99
0.9998	marcv_X1510_191.09648.09648.3	K.AAADLM[147.04]AYC[160.03]EAHAK.E	tr|I3LJ42|I3LJ42_PIG	1536.67
0.9772	marcv_X1510_191.09652.09652.2	K.LIGLYNQK.K	tr|F1S467|F1S467_PIG	947.544
1	marcv_X1510_191.09658.09658.3	K.AQHGRPQDENPVVHFFK.N	sp|P81558|MBP_PIG,tr|I3LMX2|I3LMX2_PIG,tr|I3LV79|I3LV79_PIG	2004.99
0.9806	marcv_X1510_191.09662.09662.2	K.VNFLKPNLK.V	tr|F1S414|F1S414_PIG	1071.64
0.9973	marcv_X1510_191.09678.09678.5	K.AQHGRPQDENPVVHFFK.N	sp|P81558|MBP_PIG,tr|I3LMX2|I3LMX2_PIG,tr|I3LV79|I3LV79_PIG	2004.99
0.9978	marcv_X1510_191.09685.09685.2	K.AQHGRPQDENPVVHFFK.N	sp|P81558|MBP_PIG,tr|I3LMX2|I3LMX2_PIG,tr|I3LV79|I3LV79_PIG	2004.99
0.9601	marcv_X1510_191.09686.09686.2	R.AEGTFPGKI.-	tr|F1REZ9|F1REZ9_PIG,tr|F1RLH7|F1RLH7_PIG	918.481
1	marcv_X1510_191.09743.09743.3	R.HRDTGILDSLGR.F	tr|I3LMX2|I3LMX2_PIG	1338.7
1	marcv_X1510_191.09746.09746.2	K.KYFNSYTLTGR.M	tr|F1RFD4|F1RFD4_PIG	1348.68
0.981	marcv_X1510_191.09752.09752.2	K.VAEIPFNSTNK.Y	sp|D2WKD8|AT1A2_PIG,tr|F1RGF9|F1RGF9_PIG,tr|I3L8L8|I3L8L8_PIG,tr|I3LN55|I3LN55_PIG	1218.62
0.9878	marcv_X1510_191.09754.09754.2	K.SISDVASPIR.S	tr|K7GSS3|K7GSS3_PIG,tr|K7GNQ7|K7GNQ7_PIG,tr|F1RG02|F1RG02_PIG	1043.56
0.9836	marcv_X1510_191.09804.09804.2	R.FPPPNVPGPR.F	sp|P51525|PF12_PIG,sp|P51524|PF11_PIG	1076.58
0.9998	marcv_X1510_191.09805.09805.3	K.AAADLMAYC[160.03]EAHAK.E	tr|I3LJ42|I3LJ42_PIG	1520.68
0.9665	marcv_X1510_191.09814.09814.2	K.YPVEWAK.F	tr|F1RWM0|F1RWM0_PIG,tr|I3LV68|I3LV68_PIG	891.449
0.9275	marcv_X1510_191.09846.09846.3	R.FPGQLNADLRK.L	sp|Q767L7|TBB5_PIG,sp|P02554|TBB_PIG,tr|A5GFX6|A5GFX6_PIG,tr|F2Z5K5|F2Z5K5_PIG,tr|F1S6M7|F1S6M7_PIG,tr|F2Z5B2|F2Z5B2_PIG,tr|I3LBV1|I3LBV1_PIG,tr|F2Z571|F2Z571_PIG	1257.68
0.9847	marcv_X1510_191.09860.09860.2	K.AYADFYR.N	sp|A1XQT2|COX6C_PIG,tr|F1S0P0|F1S0P0_PIG	904.408
0.9819	marcv_X1510_191.09874.09874.4	K.AQHGRPQDENPVVHFFK.N	sp|P81558|MBP_PIG,tr|I3LMX2|I3LMX2_PIG,tr|I3LV79|I3LV79_PIG	2004.99
1	marcv_X1510_191.09893.09893.3	K.AQHGRPQDENPVVHFFK.N	sp|P81558|MBP_PIG,tr|I3LMX2|I3LMX2_PIG,tr|I3LV79|I3LV79_PIG	2004.99
0.9988	marcv_X1510_191.09898.09898.3	K.AAADLM[147.04]AYC[160.03]EAHAK.E	tr|I3LJ42|I3LJ42_PIG	1536.67
0.9129	marcv_X1510_191.09900.09900.2	K.GPPVPPLPK.V	tr|I3L8X6|I3L8X6_PIG	900.543
0.9978	marcv_X1510_191.09906.09906.5	K.AQHGRPQDENPVVHFFK.N	sp|P81558|MBP_PIG,tr|I3LMX2|I3LMX2_PIG,tr|I3LV79|I3LV79_PIG	2004.99
0.9707	marcv_X1510_191.09909.09909.2	K.VPLPGPGSPEVK.R	tr|I3LCF2|I3LCF2_PIG,tr|I3L7B5|I3L7B5_PIG	1175.66
0.9974	marcv_X1510_191.09917.09917.2	K.AQHGRPQDENPVVHFFK.N	sp|P81558|MBP_PIG,tr|I3LMX2|I3LMX2_PIG,tr|I3LV79|I3LV79_PIG	2004.99
0.9574	marcv_X1510_191.09929.09929.2	K.RPNTFF.-	tr|F1S935|F1S935_PIG	780.392
0.9539	marcv_X1510_191.09946.09946.3	K.LVEQLKM[147.04]EANIDR.L	tr|I3LJ42|I3LJ42_PIG	1573.81
0.9865	marcv_X1510_191.09980.09980.4	K.LIHPDEDISLEERR.A	tr|F1RKW7|F1RKW7_PIG	1720.87
0.99	marcv_X1510_191.10039.10039.2	K.QPMTLGTITK.R	tr|F1S209|F1S209_PIG	1088.59
1	marcv_X1510_191.10049.10049.2	K.AAADLMAYC[160.03]EAHAK.E	tr|I3LJ42|I3LJ42_PIG	1520.68
0.9979	marcv_X1510_191.10050.10050.2	R.FPPPNVPGPR.F	sp|P51525|PF12_PIG,sp|P51524|PF11_PIG	1076.58
0.9545	marcv_X1510_191.10054.10054.2	K.IEISELNR.V	tr|F1SGG3|F1SGG3_PIG	972.524
0.9999	marcv_X1510_191.10062.10062.3	K.AAADLMAYC[160.03]EAHAK.E	tr|I3LJ42|I3LJ42_PIG	1520.68
1	marcv_X1510_191.10063.10063.3	R.HRDTGILDSLGR.F	tr|I3LMX2|I3LMX2_PIG	1338.7
1	marcv_X1510_191.10085.10085.2	K.ALSSALDDTEVK.K	sp|A5GFS8|VAPB_PIG	1247.62
1	marcv_X1510_191.10090.10090.2	K.SAAALLSPVK.T	tr|K7GSS3|K7GSS3_PIG,tr|K7GNQ7|K7GNQ7_PIG,tr|F1RG02|F1RG02_PIG	955.57
0.989	marcv_X1510_191.10093.10093.3	K.TSALLDNHSNLKPAPAAPSSPDAAPEPK.G	sp|Q29026|CEND_PIG	2795.41
0.9507	marcv_X1510_191.10111.10111.2	R.GTSC[160.03]NSFLLK.-	sp|Q9BDP9|CART_PIG,tr|Q307W6|Q307W6_PIG	1125.55
0.9577	marcv_X1510_191.10114.10114.4	K.TSALLDNHSNLKPAPAAPSSPDAAPEPK.G	sp|Q29026|CEND_PIG	2795.41
0.9856	marcv_X1510_191.10115.10115.2	K.AYADFYR.N	sp|A1XQT2|COX6C_PIG,tr|F1S0P0|F1S0P0_PIG	904.408
0.9879	marcv_X1510_191.10124.10124.4	K.AQHGRPQDENPVVHFFK.N	sp|P81558|MBP_PIG,tr|I3LMX2|I3LMX2_PIG,tr|I3LV79|I3LV79_PIG	2004.99
0.9674	marcv_X1510_191.10131.10131.3	K.APVPVRDEDHVVPEPLK.N	tr|F1SUM1|F1SUM1_PIG	1896.01
1	marcv_X1510_191.10141.10141.3	K.AQHGRPQDENPVVHFFK.N	sp|P81558|MBP_PIG,tr|I3LMX2|I3LMX2_PIG,tr|I3LV79|I3LV79_PIG	2004.99
0.9973	marcv_X1510_191.10154.10154.5	K.AQHGRPQDENPVVHFFK.N	sp|P81558|MBP_PIG,tr|I3LMX2|I3LMX2_PIG,tr|I3LV79|I3LV79_PIG	2004.99
0.9979	marcv_X1510_191.10158.10158.2	K.GPPVPPLPK.V	tr|I3L8X6|I3L8X6_PIG	900.543
1	marcv_X1510_191.10167.10167.2	K.AQHGRPQDENPVVHFFK.N	sp|P81558|MBP_PIG,tr|I3LMX2|I3LMX2_PIG,tr|I3LV79|I3LV79_PIG	2004.99
0.9805	marcv_X1510_191.10170.10170.3	K.M[147.04]KDTDSEEEIREAFR.V	tr|F2Z5G3|F2Z5G3_PIG	1870.84
0.9221	marcv_X1510_191.10246.10246.3	K.AAADLM[147.04]AYC[160.03]EAHAK.E	tr|I3LJ42|I3LJ42_PIG	1536.67
0.9211	marcv_X1510_191.10252.10252.2	K.DSQYFDGPVK.L	tr|I3LSN9|I3LSN9_PIG,tr|F1RMA8|F1RMA8_PIG	1154.52
0.9998	marcv_X1510_191.10291.10291.3	K.VSKPDLKPFTPEVR.K	tr|F1SI65|F1SI65_PIG,tr|I3LDT2|I3LDT2_PIG,tr|F1SI64|F1SI64_PIG	1611.9
0.9767	marcv_X1510_191.10295.10295.2	R.SEYQPSDAPFER.E	tr|F1SUM1|F1SUM1_PIG	1424.62
0.9277	marcv_X1510_191.10305.10305.2	K.VSKPDLKPFTPEVR.K	tr|F1SI65|F1SI65_PIG,tr|I3LDT2|I3LDT2_PIG,tr|F1SI64|F1SI64_PIG	1611.9
1	marcv_X1510_191.10311.10311.2	K.SPSLSPSPPSPIEK.T	tr|F1SK12|F1SK12_PIG	1421.74
0.9972	marcv_X1510_191.10313.10313.2	K.AAADLMAYC[160.03]EAHAK.E	tr|I3LJ42|I3LJ42_PIG	1520.68
0.9978	marcv_X1510_191.10322.10322.3	K.RNPEPWETVDPNVPRK.L	tr|F1SN46|F1SN46_PIG	1932.98
0.9996	marcv_X1510_191.10326.10326.3	K.AAADLMAYC[160.03]EAHAK.E	tr|I3LJ42|I3LJ42_PIG	1520.68
0.9859	marcv_X1510_191.10362.10362.3	R.HRDTGILDSLGR.F	tr|I3LMX2|I3LMX2_PIG	1338.7
0.9992	marcv_X1510_191.10364.10364.3	K.SNTKPAPGGTAPLPPWK.S	tr|F1SRV9|F1SRV9_PIG	1717.92
1	marcv_X1510_191.10373.10373.3	K.KPPAKDPLADLNIK.D	tr|F1RQM6|F1RQM6_PIG	1518.88
0.9892	marcv_X1510_191.10382.10382.4	K.AQHGRPQDENPVVHFFK.N	sp|P81558|MBP_PIG,tr|I3LMX2|I3LMX2_PIG,tr|I3LV79|I3LV79_PIG	2004.99
1	marcv_X1510_191.10386.10386.2	K.KPPAKDPLADLNIK.D	tr|F1RQM6|F1RQM6_PIG	1518.88
0.982	marcv_X1510_191.10403.10403.2	R.EAVTFLR.K	sp|Q9N0F1|ODO2_PIG	834.46
0.9396	marcv_X1510_191.10404.10404.2	R.GPATTLFGEAR.G	DECOY_tr|F1S8W8|F1S8W8_PIG_UNMAPPED	1118.57
1	marcv_X1510_191.10408.10408.3	K.AQHGRPQDENPVVHFFK.N	sp|P81558|MBP_PIG,tr|I3LMX2|I3LMX2_PIG,tr|I3LV79|I3LV79_PIG	2004.99
0.9984	marcv_X1510_191.10423.10423.5	K.AQHGRPQDENPVVHFFK.N	sp|P81558|MBP_PIG,tr|I3LMX2|I3LMX2_PIG,tr|I3LV79|I3LV79_PIG	2004.99
0.9993	marcv_X1510_191.10427.10427.3	R.KLVEQLKMEANIDR.L	tr|I3LJ42|I3LJ42_PIG	1685.91
0.9358	marcv_X1510_191.10429.10429.3	K.FFLSHPSYR.H	tr|F1RRW8|F1RRW8_PIG,tr|I3LCZ7|I3LCZ7_PIG	1152.57
0.9947	marcv_X1510_191.10430.10430.2	K.FFLSHPSYR.H	tr|F1RRW8|F1RRW8_PIG,tr|I3LCZ7|I3LCZ7_PIG	1152.57
0.9979	marcv_X1510_191.10434.10434.2	K.AQHGRPQDENPVVHFFK.N	sp|P81558|MBP_PIG,tr|I3LMX2|I3LMX2_PIG,tr|I3LV79|I3LV79_PIG	2004.99
0.989	marcv_X1510_191.10465.10465.3	R.TFIAIKPDGVQR.G	tr|F6PVJ7|F6PVJ7_PIG	1343.76
0.9901	marcv_X1510_191.10517.10517.2	K.GGLFQGGVPK.L	tr|F1RXC5|F1RXC5_PIG	958.524
0.9998	marcv_X1510_191.10521.10521.3	K.IGSLDNITHVPGGGNK.K	tr|F1RRS8|F1RRS8_PIG	1577.82
1	marcv_X1510_191.10524.10524.2	K.IGSLDNITHVPGGGNK.K	tr|F1RRS8|F1RRS8_PIG	1577.82
0.9849	marcv_X1510_191.10547.10547.2	K.IRLENEIQTYR.S	tr|I3LDS3|I3LDS3_PIG	1433.76
0.9971	marcv_X1510_191.10550.10550.3	K.IRLENEIQTYR.S	tr|I3LDS3|I3LDS3_PIG	1433.76
0.9951	marcv_X1510_191.10560.10560.2	R.FPPPNVPGPR.F	sp|P51525|PF12_PIG,sp|P51524|PF11_PIG	1076.58
1	marcv_X1510_191.10563.10563.2	K.ESTLHLVLR.L	sp|P63053|RL40_PIG,sp|P0CG68|UBC_PIG,sp|P0CG68|UBC_PIG,sp|P0CG68|UBC_PIG,sp|P0CG68|UBC_PIG,tr|A7U5U2|A7U5U2_PIG,tr|A7U5U2|A7U5U2_PIG,tr|F2Z5U0|F2Z5U0_PIG	1066.61
0.9611	marcv_X1510_191.10604.10604.2	K.AAADLMAYC[160.03]EAHAK.E	tr|I3LJ42|I3LJ42_PIG	1520.68
0.9133	marcv_X1510_191.10608.10608.2	K.QQHVIETLIGK.K	tr|I3LR32|I3LR32_PIG	1264.71
1	marcv_X1510_191.10616.10616.2	K.YFDSGDYNMAK.A	sp|Q712U6|ARP19_PIG,sp|P68211|ENSA_PIG,tr|F1SS77|F1SS77_PIG	1309.53
0.9891	marcv_X1510_191.10617.10617.2	R.DYQELMNTK.L	tr|F1SGG3|F1SGG3_PIG	1140.51
0.9847	marcv_X1510_191.10637.10637.3	R.HRDTGILDSLGR.F	tr|I3LMX2|I3LMX2_PIG	1338.7
1	marcv_X1510_191.10640.10640.3	K.KPPAKDPLADLNIK.D	tr|F1RQM6|F1RQM6_PIG	1518.88
1	marcv_X1510_191.10641.10641.2	K.VDLQSLPTR.A	tr|F2Z5F7|F2Z5F7_PIG	1027.57
0.9747	marcv_X1510_191.10649.10649.2	K.FC[160.03]GM[147.04]FC[160.03]PVEGSSENK.T	tr|I3LJE2|I3LJE2_PIG	1763.7
0.9912	marcv_X1510_191.10653.10653.4	K.AQHGRPQDENPVVHFFK.N	sp|P81558|MBP_PIG,tr|I3LMX2|I3LMX2_PIG,tr|I3LV79|I3LV79_PIG	2004.99
1	marcv_X1510_191.10654.10654.2	K.KPPAKDPLADLNIK.D	tr|F1RQM6|F1RQM6_PIG	1518.88
1	marcv_X1510_191.10657.10657.2	K.HFSGLEEAVYR.N	tr|I3LCA2|I3LCA2_PIG	1306.63
1	marcv_X1510_191.10661.10661.2	K.TANQASETFSGFGK.K	tr|F1SEN4|F1SEN4_PIG,tr|I3LRX9|I3LRX9_PIG	1443.66
0.9999	marcv_X1510_191.10662.10662.3	K.HFSGLEEAVYR.N	tr|I3LCA2|I3LCA2_PIG	1306.63
1	marcv_X1510_191.10679.10679.3	K.AQHGRPQDENPVVHFFK.N	sp|P81558|MBP_PIG,tr|I3LMX2|I3LMX2_PIG,tr|I3LV79|I3LV79_PIG	2004.99
0.9955	marcv_X1510_191.10692.10692.5	K.AQHGRPQDENPVVHFFK.N	sp|P81558|MBP_PIG,tr|I3LMX2|I3LMX2_PIG,tr|I3LV79|I3LV79_PIG	2004.99
1	marcv_X1510_191.10705.10705.2	K.AQHGRPQDENPVVHFFK.N	sp|P81558|MBP_PIG,tr|I3LMX2|I3LMX2_PIG,tr|I3LV79|I3LV79_PIG	2004.99
0.9984	marcv_X1510_191.10712.10712.3	R.NILLTNEQLENARK.V	sp|A5A761|SFXN1_PIG	1654.9
0.9491	marcv_X1510_191.10716.10716.3	K.SQIHDIVLVGGSTR.L	tr|F1S9Q3|F1S9Q3_PIG,tr|F1S9Q1|F1S9Q1_PIG	1480.8
0.9999	marcv_X1510_191.10723.10723.3	R.TTLTHALPGLSEQEGQK.T	tr|F1SIQ5|F1SIQ5_PIG	1808.93
0.9974	marcv_X1510_191.10727.10727.2	R.TIEYLQPNPASR.A	tr|F1S7L8|F1S7L8_PIG,tr|F1SNE5|F1SNE5_PIG	1387.71
0.9505	marcv_X1510_191.10731.10731.2	K.FASFIDK.V	tr|F1SGG2|F1SGG2_PIG,tr|I3LNT6|I3LNT6_PIG,tr|I3L5C4|I3L5C4_PIG,tr|F1SGG7|F1SGG7_PIG,tr|I3LLY8|I3LLY8_PIG,tr|F1SGG4|F1SGG4_PIG,tr|F1SGI7|F1SGI7_PIG,tr|I3LQN8|I3LQN8_PIG,tr|F1SGG3|F1SGG3_PIG,tr|F1SGG6|F1SGG6_PIG,tr|I3LDM6|I3LDM6_PIG,tr|F1SGI2|F1SGI2_PIG,tr|F1SGI5|F1SGI5_PIG,tr|F1SGG9|F1SGG9_PIG	826.423
0.9588	marcv_X1510_191.10744.10744.2	R.TTLTHALPGLSEQEGQK.T	tr|F1SIQ5|F1SIQ5_PIG	1808.93
0.9995	marcv_X1510_191.10747.10747.3	K.VRFLEQQNQVLQTK.W	tr|I3LNT6|I3LNT6_PIG,tr|F1SGG3|F1SGG3_PIG	1729.95
0.9784	marcv_X1510_191.10748.10748.2	K.VRFLEQQNQVLQTK.W	tr|I3LNT6|I3LNT6_PIG,tr|F1SGG3|F1SGG3_PIG	1729.95
0.9974	marcv_X1510_191.10753.10753.2	R.EGVVQGVASVAEK.T	tr|A8QW48|A8QW48_PIG	1271.67
0.9975	marcv_X1510_191.10765.10765.2	K.LTFDSSFSPNTGKK.N	sp|Q9MZ16|VDAC1_PIG	1527.76
0.987	marcv_X1510_191.10766.10766.2	K.FDLM[147.04]YAK.R	sp|P02550|TBA1A_PIG,sp|Q2XVP4|TBA1B_PIG,tr|F1RK98|F1RK98_PIG,tr|F2Z5S8|F2Z5S8_PIG,tr|F1SHC1|F1SHC1_PIG,tr|F1SR80|F1SR80_PIG,tr|F1SHQ8|F1SHQ8_PIG,tr|F2Z5T5|F2Z5T5_PIG,tr|I3LDR2|I3LDR2_PIG	902.421
0.9553	marcv_X1510_191.10774.10774.2	R.DLPLDPR.E	tr|F1S9I0|F1S9I0_PIG	824.439
0.9968	marcv_X1510_191.10775.10775.2	K.RISEQFTAM[147.04]FR.R	sp|Q767L7|TBB5_PIG,sp|P02554|TBB_PIG,tr|F2Z5K5|F2Z5K5_PIG,tr|F1S6M7|F1S6M7_PIG,tr|F2Z5B2|F2Z5B2_PIG,tr|F2Z571|F2Z571_PIG	1400.69
0.9999	marcv_X1510_191.10776.10776.3	K.RISEQFTAM[147.04]FR.R	sp|Q767L7|TBB5_PIG,sp|P02554|TBB_PIG,tr|F2Z5K5|F2Z5K5_PIG,tr|F1S6M7|F1S6M7_PIG,tr|F2Z5B2|F2Z5B2_PIG,tr|F2Z571|F2Z571_PIG	1400.69
0.9975	marcv_X1510_191.10780.10780.2	R.TPQAPAPANLVGPR.S	tr|I3LCW3|I3LCW3_PIG	1387.76
0.9924	marcv_X1510_191.10787.10787.2	K.YQLAFQR.E	tr|F1RG32|F1RG32_PIG	924.482
0.9997	marcv_X1510_191.10788.10788.3	K.AAADLMAYC[160.03]EAHAK.E	tr|I3LJ42|I3LJ42_PIG	1520.68
0.9971	marcv_X1510_191.10789.10789.2	K.NM[147.04]VPQQALVIR.N	sp|P05024|AT1A1_PIG,tr|F1RGF9|F1RGF9_PIG,tr|F1SAX3|F1SAX3_PIG,tr|I3LT88|I3LT88_PIG	1283.7
0.9979	marcv_X1510_191.10792.10792.2	K.AAADLMAYC[160.03]EAHAK.E	tr|I3LJ42|I3LJ42_PIG	1520.68
1	marcv_X1510_191.10801.10801.2	K.TPSPSSALQPLR.V	tr|I3LFV0|I3LFV0_PIG	1252.68
0.9655	marcv_X1510_191.10805.10805.2	R.EQM[147.04]AISGGFIR.R	tr|I3LUP5|I3LUP5_PIG,tr|I3LAV3|I3LAV3_PIG	1223.6
0.9773	marcv_X1510_191.10812.10812.2	K.GGDVSVC[160.03]EWYRR.V	tr|F1RLH7|F1RLH7_PIG	1482.67
0.9855	marcv_X1510_191.10814.10814.2	K.IPVIIER.Y	tr|D7RA29|D7RA29_PIG,tr|D2KQR0|D2KQR0_PIG	838.528
0.9608	marcv_X1510_191.10820.10820.2	R.GVISTPVIR.T	tr|F1SUD6|F1SUD6_PIG	940.571
0.9955	marcv_X1510_191.10832.10832.3	K.NYQTAPFDSRFPNQNQTR.N	tr|F1RLH7|F1RLH7_PIG	2183.01
0.969	marcv_X1510_191.10838.10838.2	R.LVGLLSR.S	sp|Q862B1|CRSP1_PIG,tr|F1S983|F1S983_PIG	756.486
0.997	marcv_X1510_191.10846.10846.3	R.LM[147.04]VHTVATFNSIK.E	tr|F1RR78|F1RR78_PIG	1475.78
0.9384	marcv_X1510_191.10854.10854.2	R.GLQDVLR.T	sp|Q29236|TCPZ_PIG,tr|I3LM20|I3LM20_PIG,tr|F1RIU3|F1RIU3_PIG	799.455
1	marcv_X1510_191.10880.10880.2	R.LM[147.04]VHTVATFNSIK.E	tr|F1RR78|F1RR78_PIG	1475.78
0.9998	marcv_X1510_191.10881.10881.3	K.AEPVPKPPPETPLPPGTPK.A	tr|F1SPS8|F1SPS8_PIG,tr|I3L5R1|I3L5R1_PIG	1948.07
0.97	marcv_X1510_191.10885.10885.2	K.NYQTAPFDSRFPNQNQTR.N	tr|F1RLH7|F1RLH7_PIG	2183.01
0.9998	marcv_X1510_191.10895.10895.3	K.SPSFQAQPAKPSASPAGSGSQTFLQK.K	tr|F1SIG6|F1SIG6_PIG	2603.3
0.9999	marcv_X1510_191.10903.10903.3	R.ALGGDLAPIPSSPQPKPK.A	tr|F1SBX0|F1SBX0_PIG,tr|I3LNF0|I3LNF0_PIG,tr|I3LFI1|I3LFI1_PIG	1771.98
0.9912	marcv_X1510_191.10904.10904.2	K.GAILTTM[147.04]LATR.N	sp|Q95266|KCC2D_PIG,tr|I3LNG5|I3LNG5_PIG,tr|I3LSJ3|I3LSJ3_PIG,tr|F1RL74|F1RL74_PIG	1162.64
0.9685	marcv_X1510_191.10915.10915.3	R.HRDTGILDSLGR.F	tr|I3LMX2|I3LMX2_PIG	1338.7
0.9885	marcv_X1510_191.10923.10923.3	K.IVYGHLDDPANQEIER.G	sp|P16276|ACON_PIG,tr|F1SRC5|F1SRC5_PIG	1867.91
1	marcv_X1510_191.10929.10929.2	R.GPLPAAPLAAR.E	tr|F1SQK1|F1SQK1_PIG	1032.61
0.9999	marcv_X1510_191.10953.10953.3	K.AQHGRPQDENPVVHFFK.N	sp|P81558|MBP_PIG,tr|I3LMX2|I3LMX2_PIG,tr|I3LV79|I3LV79_PIG	2004.99
0.9961	marcv_X1510_191.10958.10958.2	R.LLEELEEGQK.G	tr|I3LFW6|I3LFW6_PIG,tr|I3L6T2|I3L6T2_PIG	1186.61
0.9978	marcv_X1510_191.10973.10973.2	R.GSPLVVISQGK.L	tr|I3LJE2|I3LJE2_PIG	1083.63
0.9998	marcv_X1510_191.10981.10981.3	K.REAALILGVSPTANK.G	tr|F1SGA9|F1SGA9_PIG	1538.88
1	marcv_X1510_191.10982.10982.2	K.REAALILGVSPTANK.G	tr|F1SGA9|F1SGA9_PIG	1538.88
0.9747	marcv_X1510_191.11011.11011.2	K.VAVVNPQPQPWSK.T	tr|F1SHE5|F1SHE5_PIG	1448.78
1	marcv_X1510_191.11021.11021.2	K.LPGQPNGLGAASITK.G	tr|F1RG39|F1RG39_PIG	1422.78
1	marcv_X1510_191.11050.11050.2	R.VVDALGNAIDGK.G	sp|P80021|ATPA_PIG,tr|F1RPS8|F1RPS8_PIG	1170.62
0.9141	marcv_X1510_191.11071.11071.3	K.QFDNLKPSGGYITGDQAR.T	tr|F1SDJ6|F1SDJ6_PIG	1965.95
0.9859	marcv_X1510_191.11079.11079.2	K.TVFDEAIR.A	tr|I3LKU0|I3LKU0_PIG,tr|I3LFI0|I3LFI0_PIG	949.487
0.9825	marcv_X1510_191.11095.11095.2	R.VPDFSDYR.R	tr|F1RNZ1|F1RNZ1_PIG	997.451
0.9976	marcv_X1510_191.11107.11107.2	R.LLDTSFASSER.L	tr|F1SPS8|F1SPS8_PIG,tr|I3L5R1|I3L5R1_PIG	1224.6
0.9997	marcv_X1510_191.11116.11116.3	R.LM[147.04]VHTVATFNSIK.E	tr|F1RR78|F1RR78_PIG	1475.78
0.9993	marcv_X1510_191.11118.11118.3	K.LQENLQQLQHSTNQLAK.E	tr|I3LHT9|I3LHT9_PIG	1992.04
0.9979	marcv_X1510_191.11121.11121.2	R.IVTSEEVIIR.E	tr|I3LSH8|I3LSH8_PIG,tr|F1SIC5|F1SIC5_PIG	1157.67
0.9624	marcv_X1510_191.11122.11122.3	K.GAGHMVPTDKPQAALTM[147.04]FSR.F	tr|F1SC70|F1SC70_PIG	2130.04
0.9849	marcv_X1510_191.11125.11125.2	K.LQENLQQLQHSTNQLAK.E	tr|I3LHT9|I3LHT9_PIG	1992.04
0.9982	marcv_X1510_191.11145.11145.3	K.ITKPGSIDSNNQLFAPGGR.L	tr|I3LMH4|I3LMH4_PIG	1971.02
0.9959	marcv_X1510_191.11154.11154.2	R.LM[147.04]VHTVATFNSIK.E	tr|F1RR78|F1RR78_PIG	1475.78
0.9866	marcv_X1510_191.11170.11170.3	K.LADVAAPPGGPQPPHSPYSGPPSR.G	tr|F1SB03|F1SB03_PIG	2351.17
0.9973	marcv_X1510_191.11202.11202.2	R.M[147.04]GEEYFLR.L	sp|P06296|CRF_PIG	1059.47
1	marcv_X1510_191.11207.11207.2	R.AALIEAGMPQGAEDK.-	tr|I3L6C1|I3L6C1_PIG	1499.73
0.9998	marcv_X1510_191.11209.11209.3	R.VSQAAAELQQYC[160.03]M[147.04]QNAC[160.03]K.D	tr|F1SNC2|F1SNC2_PIG	2114.92
1	marcv_X1510_191.11221.11221.2	R.VSQAAAELQQYC[160.03]M[147.04]QNAC[160.03]K.D	tr|F1SNC2|F1SNC2_PIG	2114.92
0.9978	marcv_X1510_191.11222.11222.3	K.LIHPDEDISLEER.R	tr|F1RKW7|F1RKW7_PIG	1564.77
0.9939	marcv_X1510_191.11223.11223.2	K.LIHPDEDISLEER.R	tr|F1RKW7|F1RKW7_PIG	1564.77
0.9856	marcv_X1510_191.11236.11236.3	K.VEGGTPLFTLRK.T	sp|Q9N0F1|ODO2_PIG	1316.75
0.9824	marcv_X1510_191.11241.11241.2	K.QIFLGGVDK.H	sp|Q6QRN9|ADT3_PIG,tr|F2Z565|F2Z565_PIG,tr|I3LDJ6|I3LDJ6_PIG	975.539
0.9963	marcv_X1510_191.11250.11250.2	K.KNPQAVLDVLK.F	tr|F1SQW0|F1SQW0_PIG,tr|I3LB00|I3LB00_PIG	1223.72
0.9953	marcv_X1510_191.11253.11253.2	K.IVSNASC[160.03]TTNC[160.03]LAPLAK.V	sp|P00355|G3P_PIG,tr|F1RM74|F1RM74_PIG	1818.9
0.9874	marcv_X1510_191.11254.11254.2	K.GVILYGPPGTGK.T	tr|F2Z5J1|F2Z5J1_PIG,sp|P62197|PRS8_PIG,tr|I3LPI5|I3LPI5_PIG,tr|F1RQN5|F1RQN5_PIG	1157.64
0.9465	marcv_X1510_191.11264.11264.2	R.GPPFFAPK.R	tr|I3LG94|I3LG94_PIG	859.459
0.9962	marcv_X1510_191.11271.11271.2	K.LADVYQAELR.E	tr|F1RR02|F1RR02_PIG	1176.61
0.9967	marcv_X1510_191.11288.11288.2	R.VTGGIFSVTK.G	tr|F1SPQ3|F1SPQ3_PIG	1007.57
0.9979	marcv_X1510_191.11290.11290.2	K.LSEIVTLAK.Q	tr|F1RK10|F1RK10_PIG	972.586
0.996	marcv_X1510_191.11293.11293.2	K.RLLLQLEATK.N	tr|I3LN31|I3LN31_PIG,tr|F1SL58|F1SL58_PIG,tr|I3LNF5|I3LNF5_PIG,tr|F1SKF9|F1SKF9_PIG	1183.73
0.9932	marcv_X1510_191.11300.11300.2	K.NLPFSVENK.W	sp|Q1W0Y2|COX7C_PIG,tr|I3LC57|I3LC57_PIG	1046.54
0.9579	marcv_X1510_191.11302.11302.2	K.GAWSNVLR.G	sp|Q6QRN9|ADT3_PIG,tr|F2Z565|F2Z565_PIG,tr|F1RZQ6|F1RZQ6_PIG	901.477
0.9956	marcv_X1510_191.11313.11313.2	M.M[147.04]NVLQIVR.D	tr|F1SD73|F1SD73_PIG	987.554
0.9577	marcv_X1510_191.11339.11339.2	R.VLAQLLR.V	tr|I3LEB3|I3LEB3_PIG	811.528
0.9839	marcv_X1510_191.11340.11340.2	R.FILIQNR.A	tr|F2Z4Z5|F2Z4Z5_PIG,tr|I3LG98|I3LG98_PIG	902.534
0.9997	marcv_X1510_191.11354.11354.3	K.AAADLM[147.04]AYC[160.03]EAHAK.E	tr|I3LJ42|I3LJ42_PIG	1536.67
0.991	marcv_X1510_191.11369.11369.2	R.QSVEADINGLR.K	tr|I3L6B5|I3L6B5_PIG,tr|I3LDS3|I3LDS3_PIG,tr|F1S0K1|F1S0K1_PIG,tr|F1RXF8|F1RXF8_PIG	1200.61
1	marcv_X1510_191.11370.11370.2	R.NTGIIC[160.03]TIGPASR.S	tr|F1SHL9|F1SHL9_PIG	1358.7
0.9643	marcv_X1510_191.11385.11385.3	R.LM[147.04]VHTVATFNSIK.E	tr|F1RR78|F1RR78_PIG	1475.78
0.9747	marcv_X1510_191.11448.11448.4	K.HVPGGGSVQIVYKPVDLSK.V	tr|F1RRS8|F1RRS8_PIG	1979.08
0.9963	marcv_X1510_191.11456.11456.3	K.TEVTGDHIPTPQDLPQR.K	sp|Q712U6|ARP19_PIG	1902.94
0.9196	marcv_X1510_191.11457.11457.2	R.ISGLIYEETR.G	sp|P62802|H4_PIG	1179.61
0.9758	marcv_X1510_191.11473.11473.2	K.HVPGGGSVQIVYKPVDLSK.V	tr|F1RRS8|F1RRS8_PIG	1979.08
0.9925	marcv_X1510_191.11479.11479.2	K.YQLDPTASISAK.V	sp|Q9MZ15|VDAC2_PIG,tr|F1S2F6|F1S2F6_PIG	1292.66
0.9756	marcv_X1510_191.11483.11483.3	K.IVLEDGTLHVTEGSGR.Y	tr|I3LJE2|I3LJE2_PIG	1681.86
0.9958	marcv_X1510_191.11521.11521.2	R.VLSIGDGIAR.V	sp|P80021|ATPA_PIG,tr|F1RPS8|F1RPS8_PIG	999.571
0.9938	marcv_X1510_191.11527.11527.2	K.DQGPVVPEPLK.T	tr|F1SUM1|F1SUM1_PIG	1177.63
0.987	marcv_X1510_191.11556.11556.2	K.SPFQPGVLGSR.V	tr|F1RG89|F1RG89_PIG,tr|F1RG88|F1RG88_PIG,tr|F1RG90|F1RG90_PIG	1143.6
0.9946	marcv_X1510_191.11561.11561.2	K.NLPFSVENK.W	sp|Q1W0Y2|COX7C_PIG,tr|I3LC57|I3LC57_PIG	1046.54
0.9777	marcv_X1510_191.11569.11569.2	R.AEAGDNLGALVR.G	tr|F1RFI1|F1RFI1_PIG	1184.61
0.996	marcv_X1510_191.11605.11605.4	K.FYC[160.03]DYC[160.03]DTYLTHDSPSVRK.T	tr|F1RZ16|F1RZ16_PIG	2426.03
0.9802	marcv_X1510_191.11614.11614.2	K.NLVTGDHIPTPQDLPQRK.S	sp|P68211|ENSA_PIG,tr|F1SS77|F1SS77_PIG	2028.08
1	marcv_X1510_191.11668.11668.2	K.QSLEASLAETEGR.Y	tr|I3LDS3|I3LDS3_PIG	1389.67
0.9658	marcv_X1510_191.11670.11670.2	K.KQTALVELLK.H	sp|P08835|ALBU_PIG,tr|F1RUN2|F1RUN2_PIG	1141.71
0.9988	marcv_X1510_191.11691.11691.3	K.HVPGGGSVQIVYKPVDLSK.V	tr|F1RRS8|F1RRS8_PIG	1979.08
0.9904	marcv_X1510_191.11699.11699.3	R.VVDEREQM[147.04]AISGGFIR.R	tr|I3LUP5|I3LUP5_PIG,tr|I3LAV3|I3LAV3_PIG	1821.9
0.9956	marcv_X1510_191.11719.11719.3	R.M[147.04]AGVRPDNVAEVVAGAR.R	tr|I3LUX6|I3LUX6_PIG,tr|I3LS86|I3LS86_PIG	1726.88
1	marcv_X1510_191.11723.11723.2	M.PVAVGPYGQSQPSC[160.03]FDR.V	sp|A1XQR6|ROMO1_PIG,tr|F2Z5I3|F2Z5I3_PIG	1863.86
0.9629	marcv_X1510_191.11737.11737.2	R.M[147.04]AGVRPDNVAEVVAGAR.R	tr|I3LUX6|I3LUX6_PIG,tr|I3LS86|I3LS86_PIG	1726.88
0.9644	marcv_X1510_191.11738.11738.3	K.ILDSVGIEADDDRLNK.V	tr|F1RYZ0|F1RYZ0_PIG	1771.9
0.9845	marcv_X1510_191.11739.11739.2	K.TRDEYLSLVAR.L	tr|I3LL78|I3LL78_PIG,tr|F1RK85|F1RK85_PIG	1321.7
0.9482	marcv_X1510_191.11743.11743.2	R.QVLPPAASHFTPPQTPTK.A	tr|I3LCF2|I3LCF2_PIG,tr|I3L7B5|I3L7B5_PIG	1916.02
1	marcv_X1510_191.11750.11750.3	M.AGPETDAQFQFTGIKK.Y	tr|F1RFD4|F1RFD4_PIG	1736.87
1	marcv_X1510_191.11763.11763.2	M.AGPETDAQFQFTGIKK.Y	tr|F1RFD4|F1RFD4_PIG	1736.87
0.9767	marcv_X1510_191.11791.11791.2	K.EENM[147.04]QFIR.L	DECOY_tr|I3LSY2|I3LSY2_PIG_UNMAPPED	1081.49
0.9998	marcv_X1510_191.11805.11805.3	K.AAADLM[147.04]AYC[160.03]EAHAK.E	tr|I3LJ42|I3LJ42_PIG	1536.67
0.9909	marcv_X1510_191.11838.11838.2	K.NLPFSVENK.W	sp|Q1W0Y2|COX7C_PIG,tr|I3LC57|I3LC57_PIG	1046.54
0.9791	marcv_X1510_191.11839.11839.2	R.GFFYTPK.A	sp|P01315|INS_PIG,tr|I3LMV6|I3LMV6_PIG	858.428
0.9759	marcv_X1510_191.11878.11878.2	R.ALIDPSSGLPNR.L	tr|F1S870|F1S870_PIG	1238.66
0.9414	marcv_X1510_191.11879.11879.2	K.GAQPSIPAADGSVPVVRPC[160.03]PGR.L	sp|P29700|FETUA_PIG,tr|F1SFI7|F1SFI7_PIG	2187.12
0.9105	marcv_X1510_191.11881.11881.2	K.NILFVGK.V	tr|F1SCE3|F1SCE3_PIG	789.475
0.9951	marcv_X1510_191.11914.11914.2	K.SQFTITPGSEQIR.A	sp|P16276|ACON_PIG,tr|F1SRC5|F1SRC5_PIG	1462.74
0.9995	marcv_X1510_191.11916.11916.3	K.GAQPSIPAADGSVPVVRPC[160.03]PGR.L	sp|P29700|FETUA_PIG,tr|F1SFI7|F1SFI7_PIG	2187.12
0.9774	marcv_X1510_191.11917.11917.2	K.EFGGIGGPPSPGVAR.R	tr|F1SHM3|F1SHM3_PIG	1396.71
1	marcv_X1510_191.11921.11921.2	K.TPAVLQPAPGPQPLR.T	tr|F1SBY5|F1SBY5_PIG	1540.87
0.9987	marcv_X1510_191.11934.11934.3	K.GAGHM[147.04]VPTDKPQAALTMFSR.F	tr|F1SC70|F1SC70_PIG	2130.04
0.9532	marcv_X1510_191.11947.11947.2	K.TLVEFPR.K	tr|I3LRR4|I3LRR4_PIG	860.476
0.9865	marcv_X1510_191.11949.11949.3	R.SASTAGDIAC[160.03]AFRPVK.S	tr|I3LUI3|I3LUI3_PIG	1649.82
0.9967	marcv_X1510_191.11950.11950.2	K.SYGANFSWNK.R	tr|F1SLQ3|F1SLQ3_PIG	1172.53
0.9955	marcv_X1510_191.11958.11958.2	K.YM[147.04]AC[160.03]C[160.03]LLYR.G	sp|P02550|TBA1A_PIG,sp|Q2XVP4|TBA1B_PIG,tr|F2Z5S8|F2Z5S8_PIG,tr|F1SHC1|F1SHC1_PIG,tr|F1SR80|F1SR80_PIG,tr|F2Z5T5|F2Z5T5_PIG,tr|I3LPZ8|I3LPZ8_PIG	1264.54
0.9792	marcv_X1510_191.11961.11961.2	K.DLGEQYFK.G	sp|P08835|ALBU_PIG,tr|F1RUN2|F1RUN2_PIG	998.471
1	marcv_X1510_191.11984.11984.2	R.LMVHTVATFNSIK.E	tr|F1RR78|F1RR78_PIG	1459.79
1	marcv_X1510_191.11986.11986.2	R.ADALQAGASQFETSAAK.L	tr|F1SSX4|F1SSX4_PIG,tr|I3LVF9|I3LVF9_PIG	1664.8
1	marcv_X1510_191.12000.12000.3	R.ADALQAGASQFETSAAK.L	tr|F1SSX4|F1SSX4_PIG,tr|I3LVF9|I3LVF9_PIG	1664.8
0.9998	marcv_X1510_191.12051.12051.3	M.AGPETDAQFQFTGIKK.Y	tr|F1RFD4|F1RFD4_PIG	1736.87
0.9718	marcv_X1510_191.12063.12063.2	K.TPTVPDSPSYLGPTR.A	tr|F1S3F2|F1S3F2_PIG	1586.79
0.9964	marcv_X1510_191.12067.12067.2	K.WM[147.04]EEQAQSLIDK.T	tr|F1RZ16|F1RZ16_PIG	1492.69
1	marcv_X1510_191.12072.12072.2	K.YFNSYTLTGR.M	tr|F1RFD4|F1RFD4_PIG	1220.58
1	marcv_X1510_191.12076.12076.2	K.ILIIGNSSVGK.T	sp|Q06AU3|RAB3A_PIG,tr|F1S5W6|F1S5W6_PIG,tr|I3LHP6|I3LHP6_PIG,tr|F1SLJ0|F1SLJ0_PIG,tr|F1S6G3|F1S6G3_PIG	1099.66
1	marcv_X1510_191.12081.12081.2	K.TYFPHFNLSHGSDQVK.A	sp|P01965|HBA_PIG,tr|K7GLP2|K7GLP2_PIG,tr|F1RGX4|F1RGX4_PIG	1875.89
0.9953	marcv_X1510_191.12088.12088.2	K.LIETYFSK.N	sp|Q712P7|MYPR_PIG,tr|K7GML6|K7GML6_PIG,tr|K7GKB3|K7GKB3_PIG	999.528
1	marcv_X1510_191.12090.12090.2	K.NQGPVVPALVR.D	tr|F1SUM1|F1SUM1_PIG	1148.67
0.9598	marcv_X1510_191.12116.12116.2	R.NILSVAYK.N	tr|K7GP62|K7GP62_PIG,tr|F1SA98|F1SA98_PIG,tr|I3LLI8|I3LLI8_PIG,tr|F1STR9|F1STR9_PIG,tr|F1SDR7|F1SDR7_PIG,tr|F2Z558|F2Z558_PIG,tr|F2Z4Z1|F2Z4Z1_PIG,tr|F2Z4Y1|F2Z4Y1_PIG	906.517
0.9915	marcv_X1510_191.12119.12119.3	K.ARLTDPIPTTETSIAPR.Q	sp|F1SPM8|AAK1_PIG,tr|I3L548|I3L548_PIG	1837.99
0.9489	marcv_X1510_191.12135.12135.2	R.FPPPNFPGPR.F	sp|P51525|PF12_PIG,sp|P51524|PF11_PIG	1124.58
0.9884	marcv_X1510_191.12145.12145.2	K.AAADLMAYC[160.03]EAHAK.E	tr|I3LJ42|I3LJ42_PIG	1520.68
0.9831	marcv_X1510_191.12169.12169.2	K.LQSQLLSIEK.E	tr|F1RRW8|F1RRW8_PIG,tr|F1S593|F1S593_PIG,tr|I3LCZ7|I3LCZ7_PIG	1157.67
0.976	marcv_X1510_191.12171.12171.2	M.VNFTVDQIR.A	tr|I3LII3|I3LII3_PIG	1090.58
0.9893	marcv_X1510_191.12179.12179.4	K.TYFPHFNLSHGSDQVK.A	sp|P01965|HBA_PIG,tr|K7GLP2|K7GLP2_PIG,tr|F1RGX4|F1RGX4_PIG	1875.89
0.9947	marcv_X1510_191.12181.12181.2	K.GAALITAVGVR.L	tr|F1SUF2|F1SUF2_PIG	1026.62
1	marcv_X1510_191.12192.12192.2	K.VC[160.03]GSNLLSIC[160.03]K.T	sp|Q712P7|MYPR_PIG,tr|K7GP87|K7GP87_PIG,tr|K7GML6|K7GML6_PIG	1249.62
0.9632	marcv_X1510_191.12202.12202.3	K.AQHGRPQDENPVVHFFK.N	sp|P81558|MBP_PIG,tr|I3LMX2|I3LMX2_PIG,tr|I3LV79|I3LV79_PIG	2004.99
0.9999	marcv_X1510_191.12203.12203.3	R.LMVHTVATFNSIK.E	tr|F1RR78|F1RR78_PIG	1459.79
0.9989	marcv_X1510_191.12205.12205.3	K.AAADLMAYC[160.03]EAHAK.E	tr|I3LJ42|I3LJ42_PIG	1520.68
0.9579	marcv_X1510_191.12228.12228.3	R.VVDALGNAIDGKGPIGSK.T	sp|P80021|ATPA_PIG,tr|F1RPS8|F1RPS8_PIG	1709.93
0.9961	marcv_X1510_191.12231.12231.2	K.QAGVFEPTIVK.V	tr|F1SB63|F1SB63_PIG	1187.66
0.9926	marcv_X1510_191.12286.12286.2	K.VPEWVDTVK.L	sp|Q29308|RS19_PIG,tr|I3LQK3|I3LQK3_PIG,tr|F1RGG1|F1RGG1_PIG	1071.56
0.996	marcv_X1510_191.12303.12303.3	K.TYFPHFNLSHGSDQVK.A	sp|P01965|HBA_PIG,tr|K7GLP2|K7GLP2_PIG,tr|F1RGX4|F1RGX4_PIG	1875.89
0.9978	marcv_X1510_191.12304.12304.2	R.TTPSYVAFTDTER.L	sp|Q6S4N2|HS71B_PIG,sp|A5A8V7|HS71L_PIG,sp|Q04967|HSP76_PIG,tr|F1SA70|F1SA70_PIG,tr|F1S9Q3|F1S9Q3_PIG,tr|F1S9Q1|F1S9Q1_PIG	1486.69
0.9999	marcv_X1510_191.12313.12313.3	R.FSWGAEGQKPGFGYGGR.A	sp|P81558|MBP_PIG,tr|I3LMX2|I3LMX2_PIG	1799.84
0.9818	marcv_X1510_191.12316.12316.3	K.RVIISAPSADAPM[147.04]FVM[147.04]GVNHEK.Y	sp|P00355|G3P_PIG	2400.19
0.9774	marcv_X1510_191.12327.12327.2	R.LDLIAQQM[147.04]M[147.04]PEVR.G	tr|F1SHR3|F1SHR3_PIG	1574.78
1	marcv_X1510_191.12328.12328.2	R.FSWGAEGQKPGFGYGGR.A	sp|P81558|MBP_PIG,tr|I3LMX2|I3LMX2_PIG	1799.84
1	marcv_X1510_191.12352.12352.3	R.VSQAAAELQQYC[160.03]MQNAC[160.03]K.D	tr|F1SNC2|F1SNC2_PIG	2098.92
1	marcv_X1510_191.12354.12354.2	R.VSQAAAELQQYC[160.03]MQNAC[160.03]K.D	tr|F1SNC2|F1SNC2_PIG	2098.92
0.988	marcv_X1510_191.12356.12356.2	K.ATIVPGIVTGK.N	tr|F1SLI3|F1SLI3_PIG	1054.64
1	marcv_X1510_191.12366.12366.2	R.LLRDYQELMNTK.L	tr|F1SGG3|F1SGG3_PIG	1522.78
0.9987	marcv_X1510_191.12379.12379.3	R.LLRDYQELMNTK.L	tr|F1SGG3|F1SGG3_PIG	1522.78
0.991	marcv_X1510_191.12393.12393.2	K.TYATAEPFIDAK.Y	tr|B7TY10|B7TY10_PIG,tr|B7TY11|B7TY11_PIG	1325.65
1	marcv_X1510_191.12396.12396.2	K.DPPSPYNLAYK.Y	tr|K7GNV3|K7GNV3_PIG,tr|K7GQZ6|K7GQZ6_PIG,tr|F1RXN8|F1RXN8_PIG	1263.61
0.9783	marcv_X1510_191.12402.12402.2	K.NLPFSVENK.W	sp|Q1W0Y2|COX7C_PIG,tr|I3LC57|I3LC57_PIG	1046.54
0.9905	marcv_X1510_191.12405.12405.2	K.FNPFVTSDR.S	tr|F2Z5N5|F2Z5N5_PIG,tr|I3L7Y1|I3L7Y1_PIG	1081.52
0.9966	marcv_X1510_191.12417.12417.2	K.VLVVDQLSM[147.04]R.M	tr|F1RS11|F1RS11_PIG	1174.64
0.991	marcv_X1510_191.12419.12419.2	R.DPVLTLR.A	tr|I3LVP6|I3LVP6_PIG	812.476
0.946	marcv_X1510_191.12443.12443.3	K.EFNPTKPLLSVNK.S	tr|I3L9R9|I3L9R9_PIG	1485.82
0.9901	marcv_X1510_191.12445.12445.3	K.DTDSEEEIREAFR.V	tr|F2Z5G3|F2Z5G3_PIG	1595.71
0.9944	marcv_X1510_191.12450.12450.2	R.AGLQFPVGR.V	tr|F2Z587|F2Z587_PIG,tr|F2Z575|F2Z575_PIG,tr|F2Z5L2|F2Z5L2_PIG,tr|F1RPK0|F1RPK0_PIG,tr|I3L7T6|I3L7T6_PIG,tr|F1RTQ7|F1RTQ7_PIG,tr|F2Z5P1|F2Z5P1_PIG,tr|F2Z5L5|F2Z5L5_PIG,tr|F2Z5L6|F2Z5L6_PIG,tr|F1RPL1|F1RPL1_PIG,tr|F2Z5I4|F2Z5I4_PIG,tr|F1RPL3|F1RPL3_PIG	943.524
1	marcv_X1510_191.12452.12452.3	K.GTGKPAPAPAPPPFLSPTPR.L	tr|F1SM44|F1SM44_PIG	1955.06
1	marcv_X1510_191.12460.12460.2	R.FPPPNFPGPR.F	sp|P51525|PF12_PIG,sp|P51524|PF11_PIG	1124.58
1	marcv_X1510_191.12463.12463.2	K.HALIIYDDLSK.Q	sp|P80021|ATPA_PIG,tr|F1RPS8|F1RPS8_PIG	1286.69
1	marcv_X1510_191.12465.12465.2	R.NAVTQEFGPVPDTAR.Y	sp|P16276|ACON_PIG,tr|F1SRC5|F1SRC5_PIG	1600.78
0.9697	marcv_X1510_191.12474.12474.3	K.AQHGRPQDENPVVHFFK.N	sp|P81558|MBP_PIG,tr|I3LMX2|I3LMX2_PIG,tr|I3LV79|I3LV79_PIG	2004.99
1	marcv_X1510_191.12477.12477.2	K.APAGPQAPAPVPVPVPAK.R	tr|F1SM44|F1SM44_PIG	1662.95
0.9788	marcv_X1510_191.12491.12491.2	R.NVQAEEM[147.04]VEFSSGLK.G	sp|P80021|ATPA_PIG,tr|F1RPS8|F1RPS8_PIG	1682.78
0.9975	marcv_X1510_191.12502.12502.2	R.VLDELTLTK.T	tr|I3LDS3|I3LDS3_PIG,tr|F1S0K1|F1S0K1_PIG,tr|F1S0K2|F1S0K2_PIG	1030.59
0.9923	marcv_X1510_191.12503.12503.2	R.SPAWVPVPAR.R	tr|I3LCT5|I3LCT5_PIG	1078.59
0.9854	marcv_X1510_191.12516.12516.3	R.VFDKDGNGYISAAELR.H	tr|F2Z5G3|F2Z5G3_PIG	1753.86
0.9983	marcv_X1510_191.12517.12517.3	R.LMVHTVATFNSIK.E	tr|F1RR78|F1RR78_PIG	1459.79
0.9453	marcv_X1510_191.12518.12518.2	K.VFNLYPR.K	tr|I3LJE2|I3LJE2_PIG	907.492
1	marcv_X1510_191.12529.12529.2	R.VFDKDGNGYISAAELR.H	tr|F2Z5G3|F2Z5G3_PIG	1753.86
0.9538	marcv_X1510_191.12531.12531.2	R.YPGFMR.V	tr|I3LI05|I3LI05_PIG	769.358
0.9354	marcv_X1510_191.12551.12551.2	R.NFDEILR.V	sp|Q9TSX9|PRDX6_PIG	905.461
1	marcv_X1510_191.12554.12554.2	K.ILETTMTPTGIDTAK.L	tr|I3LBS8|I3LBS8_PIG	1590.82
1	marcv_X1510_191.12556.12556.2	R.GNPTVEVDLYTAK.G	tr|I3LCN1|I3LCN1_PIG	1405.71
0.9925	marcv_X1510_191.12557.12557.2	K.YAGLTFPK.L	tr|F1RW16|F1RW16_PIG,tr|K7GT04|K7GT04_PIG,tr|K7GP94|K7GP94_PIG	895.48
0.9888	marcv_X1510_191.12565.12565.2	K.DLSLEEIQK.K	sp|Q6DUB7|STMN1_PIG,tr|K7GMK4|K7GMK4_PIG,tr|K7GP96|K7GP96_PIG,tr|F1RWM1|F1RWM1_PIG	1073.56
1	marcv_X1510_191.12588.12588.2	R.SQEYLLDEGPTPDTPQR.E	tr|I3LCF2|I3LCF2_PIG,tr|I3L7B5|I3L7B5_PIG	1944.91
0.9887	marcv_X1510_191.12598.12598.3	K.TSDIFGSPVTAASPLAHPNKPK.D	tr|I7KJP5|I7KJP5_PIG	2234.17
1	marcv_X1510_191.12619.12619.3	K.LPTSLKPPGAMSTNVSPSVAPSK.L	tr|F1S8C6|F1S8C6_PIG,tr|K7GMY8|K7GMY8_PIG	2265.2
0.9764	marcv_X1510_191.12630.12630.2	R.GSLFFNPK.S	sp|Q29549|CLUS_PIG,tr|F1RJS2|F1RJS2_PIG	908.476
0.9932	marcv_X1510_191.12636.12636.2	R.SAYSSYSAPVSSSLSVR.R	sp|P02547|NFL_PIG,tr|F1RJU4|F1RJU4_PIG	1746.84
1	marcv_X1510_191.12651.12651.2	K.STLAQVIM[147.04]DR.Y	tr|F1S0P3|F1S0P3_PIG	1148.59
0.9981	marcv_X1510_191.12701.12701.3	K.LVEQLRIEAGIER.L	tr|I3LKQ1|I3LKQ1_PIG	1524.86
1	marcv_X1510_191.12703.12703.2	K.LVEQLRIEAGIER.L	tr|I3LKQ1|I3LKQ1_PIG	1524.86
0.9957	marcv_X1510_191.12707.12707.2	K.YNILGTNTIM[147.04]DK.M	tr|F1S8L9|F1S8L9_PIG	1397.69
0.9973	marcv_X1510_191.12728.12728.3	K.M[147.04]ALDIEIAAYRK.L	sp|P02547|NFL_PIG,sp|P08552|NFM_PIG,tr|F1S847|F1S847_PIG,tr|F1RFH3|F1RFH3_PIG,tr|F1RJU4|F1RJU4_PIG,tr|F1RJU6|F1RJU6_PIG	1408.74
1	marcv_X1510_191.12736.12736.2	R.FPPPNFPGPR.F	sp|P51525|PF12_PIG,sp|P51524|PF11_PIG	1124.58
0.9842	marcv_X1510_191.12737.12737.2	R.EFVSISSPAHVAT.-	tr|F1SAH0|F1SAH0_PIG	1343.67
1	marcv_X1510_191.12738.12738.2	R.SGQASPSRPESPRPPFDL.-	tr|F1RRW8|F1RRW8_PIG	1923.94
0.9861	marcv_X1510_191.12741.12741.2	K.FLQDGAPWK.N	sp|Q29259|NDUB6_PIG,tr|Q2EN80|Q2EN80_PIG	1060.53
0.9936	marcv_X1510_191.12742.12742.2	R.ISEQFTAM[147.04]FR.R	sp|Q767L7|TBB5_PIG,sp|P02554|TBB_PIG,tr|F2Z5K5|F2Z5K5_PIG,tr|F1S6M7|F1S6M7_PIG,tr|F2Z5B2|F2Z5B2_PIG,tr|F2Z571|F2Z571_PIG	1244.59
0.9882	marcv_X1510_191.12755.12755.3	K.AQHGRPQDENPVVHFFK.N	sp|P81558|MBP_PIG,tr|I3LMX2|I3LMX2_PIG,tr|I3LV79|I3LV79_PIG	2004.99
0.9827	marcv_X1510_191.12756.12756.2	K.EAVILPIK.F	tr|I3LL27|I3LL27_PIG	881.559
0.9949	marcv_X1510_191.12758.12758.2	K.ISM[147.04]PDVDLNLK.G	tr|I3L5D5|I3L5D5_PIG,tr|I3L5D5|I3L5D5_PIG	1259.64
0.9921	marcv_X1510_191.12759.12759.2	K.ILSLSEEGSLER.H	tr|F1RTX9|F1RTX9_PIG	1331.69
0.9966	marcv_X1510_191.12793.12793.2	R.HNPSSNILFLGR.L	sp|P80229|ILEU_PIG,tr|F2Z5B1|F2Z5B1_PIG	1353.72
0.9861	marcv_X1510_191.12796.12796.3	R.HNPSSNILFLGR.L	sp|P80229|ILEU_PIG,tr|F2Z5B1|F2Z5B1_PIG	1353.72
1	marcv_X1510_191.12806.12806.2	R.TLVM[147.04]LDEQGEQLER.L	tr|I3LUP5|I3LUP5_PIG,tr|I3LAV3|I3LAV3_PIG	1675.81
0.9737	marcv_X1510_191.12810.12810.2	K.VYEDSGIPLPADSPK.K	tr|F1RFR7|F1RFR7_PIG	1586.78
1	marcv_X1510_191.12820.12820.2	R.GLGSPEPGPTAPYLGR.S	tr|F1SJX9|F1SJX9_PIG	1567.8
0.9998	marcv_X1510_191.12840.12840.3	R.SGQASPSRPESPRPPFDL.-	tr|F1RRW8|F1RRW8_PIG	1923.94
0.9958	marcv_X1510_191.12856.12856.2	K.GGDVSVC[160.03]EWYR.R	tr|F1RLH7|F1RLH7_PIG	1326.57
0.9951	marcv_X1510_191.12857.12857.2	R.LINQPLPDLK.N	tr|F1SSS6|F1SSS6_PIG	1149.68
0.9623	marcv_X1510_191.12860.12860.2	K.LSTPSSLSSSQEILK.D	tr|K7GSS3|K7GSS3_PIG,tr|K7GNQ7|K7GNQ7_PIG,tr|F1RG02|F1RG02_PIG	1575.84
0.989	marcv_X1510_191.12873.12873.2	K.YIIIGDTGVGK.S	tr|F1S8J6|F1S8J6_PIG	1134.63
0.9979	marcv_X1510_191.12893.12893.2	K.ILLLGAGESGK.S	tr|F1RV20|F1RV20_PIG,sp|P29797|GNAS_PIG,tr|A5GFU8|A5GFU8_PIG,tr|Q06AS8|Q06AS8_PIG,tr|A5GFU0|A5GFU0_PIG,tr|A5GFU5|A5GFU5_PIG,tr|A5GFU6|A5GFU6_PIG,tr|A5GFU7|A5GFU7_PIG,tr|A5GFU2|A5GFU2_PIG,tr|Q06AS6|Q06AS6_PIG,tr|A5GFU3|A5GFU3_PIG,tr|A5GFU4|A5GFU4_PIG,tr|I3LA61|I3LA61_PIG,tr|I3LK93|I3LK93_PIG,tr|F1RF18|F1RF18_PIG,tr|F1SB91|F1SB91_PIG	1056.62
0.9999	marcv_X1510_191.12897.12897.3	K.LFQEDNGIPVHLK.G	tr|F1RQI1|F1RQI1_PIG	1508.8
1	marcv_X1510_191.12898.12898.2	K.LFQEDNGIPVHLK.G	tr|F1RQI1|F1RQI1_PIG	1508.8
0.966	marcv_X1510_191.12903.12903.2	K.ASAELALGENNEVLK.S	sp|P00506|AATM_PIG	1556.8
0.917	marcv_X1510_191.12973.12973.2	K.LVEQLRIEAGIER.L	tr|I3LKQ1|I3LKQ1_PIG	1524.86
0.9211	marcv_X1510_191.12988.12988.3	R.DVLSSLPM[147.04]KPC[160.03]PEAIK.E	sp|Q8WMQ3|CD9_PIG,tr|F1SL24|F1SL24_PIG,tr|K7GMI9|K7GMI9_PIG,tr|I3LPR3|I3LPR3_PIG	1799.92
1	marcv_X1510_191.12990.12990.2	R.ILGADTSVDLEETGR.V	sp|P80021|ATPA_PIG,tr|F1RPS8|F1RPS8_PIG	1574.78
0.9356	marcv_X1510_191.12995.12995.2	R.DVLSSLPM[147.04]KPC[160.03]PEAIK.E	sp|Q8WMQ3|CD9_PIG,tr|F1SL24|F1SL24_PIG,tr|K7GMI9|K7GMI9_PIG,tr|I3LPR3|I3LPR3_PIG	1799.92
0.9975	marcv_X1510_191.13000.13000.2	R.DAEAWFNEK.S	tr|I3LDS3|I3LDS3_PIG,tr|F1RXG1|F1RXG1_PIG	1108.48
1	marcv_X1510_191.13010.13010.2	R.FPPPNFPGPR.F	sp|P51525|PF12_PIG,sp|P51524|PF11_PIG	1124.58
0.9909	marcv_X1510_191.13032.13032.2	K.LTFDSSFSPNTGK.K	sp|Q9MZ16|VDAC1_PIG	1399.66
1	marcv_X1510_191.13043.13043.2	R.LQQTQAQVDEVVDIM[147.04]R.V	tr|F1SSX4|F1SSX4_PIG	1887.94
0.9861	marcv_X1510_191.13068.13068.2	K.APGFAQMLK.E	tr|I3LCA2|I3LCA2_PIG	961.506
0.9971	marcv_X1510_191.13071.13071.3	K.AAADLM[147.04]AYC[160.03]EAHAK.E	tr|I3LJ42|I3LJ42_PIG	1536.67
0.9938	marcv_X1510_191.13078.13078.2	K.DVLEDIPK.W	tr|F1SSS6|F1SSS6_PIG	927.491
0.9996	marcv_X1510_191.13091.13091.3	R.FSWGAEGQKPGFGYGGR.A	sp|P81558|MBP_PIG,tr|I3LMX2|I3LMX2_PIG	1799.84
1	marcv_X1510_191.13092.13092.2	K.RMLDAQVQTDPVSIGPVGK.S	tr|A5GFR8|A5GFR8_PIG	2010.06
0.9222	marcv_X1510_191.13102.13102.3	K.GAGHMVPTDKPQAALTMFSR.F	tr|F1SC70|F1SC70_PIG	2114.04
1	marcv_X1510_191.13104.13104.2	R.FSWGAEGQKPGFGYGGR.A	sp|P81558|MBP_PIG,tr|I3LMX2|I3LMX2_PIG	1799.84
0.9848	marcv_X1510_191.13106.13106.2	R.LLEETQAELLK.A	tr|F1SB03|F1SB03_PIG	1285.71
0.9963	marcv_X1510_191.13130.13130.2	K.ITALDEFATK.L	tr|F1RR78|F1RR78_PIG	1107.58
0.9897	marcv_X1510_191.13141.13141.2	K.NLPFSVENK.W	sp|Q1W0Y2|COX7C_PIG,tr|I3LC57|I3LC57_PIG	1046.54
0.9928	marcv_X1510_191.13143.13143.2	R.VLDELTLAR.T	tr|F1S0J8|F1S0J8_PIG,tr|F1S0L1|F1S0L1_PIG	1028.59
0.9893	marcv_X1510_191.13145.13145.2	R.GGAPGQAPGIVPGPGLVK.D	tr|F1SNT8|F1SNT8_PIG	1570.88
0.9125	marcv_X1510_191.13159.13159.2	R.FAVFIEK.V	tr|F1S847|F1S847_PIG	852.475
0.9998	marcv_X1510_191.13166.13166.3	K.LFQEDNGIPVHLK.G	tr|F1RQI1|F1RQI1_PIG	1508.8
0.9979	marcv_X1510_191.13169.13169.2	R.VVVDALSGLK.G	sp|Q29577|KCRU_PIG,tr|F1SI77|F1SI77_PIG	999.596
0.9346	marcv_X1510_191.13171.13171.3	R.FFHETEAPRPTDFLSK.F	tr|F1SJP6|F1SJP6_PIG,tr|F1SRG2|F1SRG2_PIG,tr|I3LII0|I3LII0_PIG	1920.94
0.9977	marcv_X1510_191.13180.13180.2	K.TMDVIAEGDPGFK.R	tr|F1RQC1|F1RQC1_PIG,tr|I3L703|I3L703_PIG	1378.64
1	marcv_X1510_191.13193.13193.3	K.SPQVLYSPVSPLSPHR.L	tr|F1SPS8|F1SPS8_PIG	1762.94
1	marcv_X1510_191.13195.13195.2	K.QEILAALEK.G	tr|I3LS26|I3LS26_PIG,tr|F1SU97|F1SU97_PIG	1013.58
0.9718	marcv_X1510_191.13210.13210.2	R.FSWGAEGQKPGFG.-	tr|I3LV79|I3LV79_PIG,sp|P81558|MBP_PIG,tr|I3LMX2|I3LMX2_PIG	1366.63
1	marcv_X1510_191.13216.13216.2	K.SPQVLYSPVSPLSPHR.L	tr|F1SPS8|F1SPS8_PIG	1762.94
0.9579	marcv_X1510_191.13244.13244.2	K.LVEQLRIEAGIER.L	tr|I3LKQ1|I3LKQ1_PIG	1524.86
0.9267	marcv_X1510_191.13246.13246.2	R.INEILSNALK.R	tr|F1SA50|F1SA50_PIG	1113.64
0.9997	marcv_X1510_191.13247.13247.3	R.C[160.03]PVPSFHVELC[160.03]R.E	tr|F1RQ47|F1RQ47_PIG	1499.7
0.9962	marcv_X1510_191.13251.13251.2	R.C[160.03]PVPSFHVELC[160.03]R.E	tr|F1RQ47|F1RQ47_PIG	1499.7
0.9904	marcv_X1510_191.13254.13254.3	K.NLVTGDHIPTPQDLPQR.K	sp|P68211|ENSA_PIG,tr|F1SS77|F1SS77_PIG	1899.98
0.9998	marcv_X1510_191.13257.13257.3	R.DVLSSLPM[147.04]KPC[160.03]PEAIK.E	sp|Q8WMQ3|CD9_PIG,tr|F1SL24|F1SL24_PIG,tr|K7GMI9|K7GMI9_PIG,tr|I3LPR3|I3LPR3_PIG	1799.92
0.9732	marcv_X1510_191.13263.13263.2	K.LVLLGESAVGK.S	sp|Q06AU6|RAB5A_PIG,tr|F2Z560|F2Z560_PIG,tr|I3LFZ8|I3LFZ8_PIG,tr|I3LR74|I3LR74_PIG	1084.65
1	marcv_X1510_191.13270.13270.2	R.DVLSSLPM[147.04]KPC[160.03]PEAIK.E	sp|Q8WMQ3|CD9_PIG,tr|F1SL24|F1SL24_PIG,tr|K7GMI9|K7GMI9_PIG,tr|I3LPR3|I3LPR3_PIG	1799.92
1	marcv_X1510_191.13271.13271.2	R.ILGADTSVDLEETGR.V	sp|P80021|ATPA_PIG,tr|F1RPS8|F1RPS8_PIG	1574.78
0.9854	marcv_X1510_191.13273.13273.2	R.LTLADIER.L	tr|F1S086|F1S086_PIG,tr|I3L8T2|I3L8T2_PIG	929.518
0.9976	marcv_X1510_191.13276.13276.3	R.VAPEEHPVLLTEAPLNPK.A	sp|Q6QAQ1|ACTB_PIG,tr|I3LVD5|I3LVD5_PIG	1953.06
0.9933	marcv_X1510_191.13277.13277.2	K.IGLFGGAGVGK.T	tr|F1SLA0|F1SLA0_PIG	974.555
1	marcv_X1510_191.13283.13283.2	R.FPPPNFPGPR.F	sp|P51525|PF12_PIG,sp|P51524|PF11_PIG	1124.58
0.9941	marcv_X1510_191.13286.13286.2	K.DPFLNPDLM[147.04]K.S	tr|F1RG32|F1RG32_PIG	1204.58
0.9928	marcv_X1510_191.13291.13291.3	K.RLQDALQPILAK.H	tr|F1S3D6|F1S3D6_PIG	1364.81
1	marcv_X1510_191.13300.13300.2	K.VAPQAVLNDISK.K	tr|F1S7T1|F1S7T1_PIG	1253.7
0.9842	marcv_X1510_191.13311.13311.2	R.VAPEEHPVLLTEAPLNPK.A	sp|Q6QAQ1|ACTB_PIG,tr|I3LVD5|I3LVD5_PIG	1953.06
1	marcv_X1510_191.13319.13319.3	K.FYC[160.03]DYC[160.03]DTYLTHDSPSVR.K	tr|F1RZ16|F1RZ16_PIG	2297.94
0.9977	marcv_X1510_191.13322.13322.3	K.RMLDAQVQTDPVSIGPVGK.S	tr|A5GFR8|A5GFR8_PIG	2010.06
1	marcv_X1510_191.13324.13324.2	K.QC[160.03]ANLQNAIADAEQR.G	tr|F1SGG6|F1SGG6_PIG	1700.79
1	marcv_X1510_191.13329.13329.2	K.NLVTGDHIPTPQDLPQR.K	sp|P68211|ENSA_PIG,tr|F1SS77|F1SS77_PIG	1899.98
0.9971	marcv_X1510_191.13344.13344.2	R.M[147.04]ASPPAPSPAPPAVSPIIK.N	tr|I3LT56|I3LT56_PIG	1842.99
0.9348	marcv_X1510_191.13349.13349.2	K.VDEDTLEGVAVK.M	DECOY_tr|F1SPF3|F1SPF3_PIG_UNMAPPED	1273.64
1	marcv_X1510_191.13351.13351.2	M.VPPVQVSPLIK.L	sp|Q9MYT8|ATP5I_PIG	1175.73
0.996	marcv_X1510_191.13359.13359.2	K.FC[160.03]GMFC[160.03]PVEGSSENK.T	tr|I3LJE2|I3LJE2_PIG	1747.7
0.9987	marcv_X1510_191.13362.13362.3	R.FSWGAEGQKPGFGYGGR.A	sp|P81558|MBP_PIG,tr|I3LMX2|I3LMX2_PIG	1799.84
1	marcv_X1510_191.13364.13364.3	K.FYIREPPHGSPDWLK.V	tr|F1RRC9|F1RRC9_PIG	1840.93
1	marcv_X1510_191.13369.13369.2	K.FYIREPPHGSPDWLK.V	tr|F1RRC9|F1RRC9_PIG	1840.93
0.9999	marcv_X1510_191.13379.13379.3	K.VNNSSLIGVGYTQTLRPGVK.L	sp|Q9MZ15|VDAC2_PIG,tr|F1S2F6|F1S2F6_PIG	2102.15
1	marcv_X1510_191.13380.13380.2	R.INVYYNEATGGNYVPR.A	tr|F2Z5K5|F2Z5K5_PIG	1828.87
1	marcv_X1510_191.13388.13388.2	K.AFLDC[160.03]C[160.03]EYIAK.L	sp|P01025|CO3_PIG	1388.61
0.9929	marcv_X1510_191.13396.13396.2	K.GNIILIPER.S	tr|F1S553|F1S553_PIG	1023.61
0.9999	marcv_X1510_191.13409.13409.3	K.TLEPVKPPTVPNDYMTSPAR.L	tr|F1RTW7|F1RTW7_PIG,tr|I3LP31|I3LP31_PIG	2212.12
0.9884	marcv_X1510_191.13423.13423.2	K.NLPFSVENK.W	sp|Q1W0Y2|COX7C_PIG,tr|I3LC57|I3LC57_PIG	1046.54
1	marcv_X1510_191.13431.13431.2	R.LTDPIPTTETSIAPR.Q	sp|F1SPM8|AAK1_PIG,tr|I3L548|I3L548_PIG	1610.85
0.9957	marcv_X1510_191.13437.13437.2	K.SAADIITLAR.K	tr|I3LVS8|I3LVS8_PIG,tr|I3LN38|I3LN38_PIG,tr|I3LEA3|I3LEA3_PIG	1029.58
0.9966	marcv_X1510_191.13443.13443.2	K.VSSPLSPLSPGIK.S	tr|F1SBP5|F1SBP5_PIG	1280.73
0.9998	marcv_X1510_191.13456.13456.3	K.LVPIKPAPLPLSPGK.N	tr|F1RWJ3|F1RWJ3_PIG	1525.96
0.9999	marcv_X1510_191.13470.13470.3	R.NLHQSGFSLSGAQIDDNIPR.R	tr|I3LJE2|I3LJE2_PIG	2168.06
0.967	marcv_X1510_191.13494.13494.2	R.SQLLILDR.G	tr|F1RS11|F1RS11_PIG,tr|F1S5Y5|F1S5Y5_PIG	956.565
1	marcv_X1510_191.13500.13500.2	R.GLYDGPVC[160.03]EVSVTPK.T	tr|I3LJE2|I3LJE2_PIG	1619.79
1	marcv_X1510_191.13509.13509.2	K.GC[160.03]SFLPDPYQK.Q	tr|I3LS26|I3LS26_PIG,tr|F1SU97|F1SU97_PIG	1310.6
0.9962	marcv_X1510_191.13511.13511.2	R.VFSGLVSTGLK.V	tr|I3LII3|I3LII3_PIG	1106.63
0.9503	marcv_X1510_191.13524.13524.2	R.FIPPWLKK.Q	tr|I3LUL5|I3LUL5_PIG	1027.62
0.9715	marcv_X1510_191.13527.13527.2	K.FSVPGFK.A	tr|I3L5D5|I3L5D5_PIG,tr|I3L5D5|I3L5D5_PIG	780.417
0.9829	marcv_X1510_191.13535.13535.3	K.LVEQLRIEAGIER.L	tr|I3LKQ1|I3LKQ1_PIG	1524.86
0.9948	marcv_X1510_191.13536.13536.2	K.LAVNM[147.04]VPFPR.L	sp|Q767L7|TBB5_PIG,sp|P02554|TBB_PIG,tr|A5GFX6|A5GFX6_PIG,tr|F2Z5K5|F2Z5K5_PIG,tr|F1S6M7|F1S6M7_PIG,tr|F2Z5B2|F2Z5B2_PIG,tr|I3LBV1|I3LBV1_PIG,tr|F2Z571|F2Z571_PIG	1158.62
0.9851	marcv_X1510_191.13540.13540.2	K.DPLADLNIK.D	tr|F1RQM6|F1RQM6_PIG	997.544
0.9699	marcv_X1510_191.13548.13548.2	R.SDLLAAIR.M	tr|I3LQK6|I3LQK6_PIG,tr|F1RTK2|F1RTK2_PIG	857.497
0.9429	marcv_X1510_191.13551.13551.3	K.NLPFSVENKWR.L	sp|Q1W0Y2|COX7C_PIG	1388.72
1	marcv_X1510_191.13556.13556.2	R.FPPPNFPGPR.F	sp|P51525|PF12_PIG,sp|P51524|PF11_PIG	1124.58
1	marcv_X1510_191.13564.13564.2	R.LPATAAEPEVAVISNGEH.-	tr|F1SMG8|F1SMG8_PIG	1803.9
0.9981	marcv_X1510_191.13567.13567.3	R.EARDPFEDLLRK.T	tr|F1SKU2|F1SKU2_PIG	1487.77
1	marcv_X1510_191.13570.13570.2	R.M[147.04]LDAQVQTDPVSIGPVGK.S	tr|A5GFR8|A5GFR8_PIG	1869.95
0.9688	marcv_X1510_191.13572.13572.3	K.IFQADNDLPVHLK.G	sp|Q8SPJ9|CX7A1_PIG	1508.8
1	marcv_X1510_191.13577.13577.2	K.TEWLC[160.03]LNC[160.03]QTK.R	tr|F1SPS8|F1SPS8_PIG,tr|I3L5R1|I3L5R1_PIG	1451.65
0.996	marcv_X1510_191.13582.13582.2	R.TPAIPTAVNLADSR.T	tr|I3LCW3|I3LCW3_PIG	1424.76
0.9902	marcv_X1510_191.13590.13590.2	K.RDSFPNFLAC[160.03]K.H	tr|F1SCH1|F1SCH1_PIG	1353.65
1	marcv_X1510_191.13611.13611.3	R.AFDQGADAIYEHINQGK.L	tr|Q2EN79|Q2EN79_PIG	1875.88
1	marcv_X1510_191.13612.13612.2	R.AFDQGADAIYEHINQGK.L	tr|Q2EN79|Q2EN79_PIG	1875.88
0.9831	marcv_X1510_191.13621.13621.2	M.VPPVQVSPLIK.L	sp|Q9MYT8|ATP5I_PIG	1175.73
0.9904	marcv_X1510_191.13625.13625.2	R.TPTPAGPTIM[147.04]PLIR.Q	sp|Q5W9D5|QKI_PIG,tr|F1SBW4|F1SBW4_PIG	1479.81
0.9819	marcv_X1510_191.13634.13634.2	R.EAALILGVSPTANK.G	tr|F1SGA9|F1SGA9_PIG	1382.78
0.9213	marcv_X1510_191.13640.13640.2	R.GLVVPVIR.N	sp|Q9N0F1|ODO2_PIG	851.559
0.9964	marcv_X1510_191.13650.13650.2	R.VQGVSWAALR.L	tr|I3LUX6|I3LUX6_PIG,tr|I3LS86|I3LS86_PIG	1085.6
0.9877	marcv_X1510_191.13668.13668.2	K.SFDSASQVPSPAAAAIPR.T	tr|F1RLS1|F1RLS1_PIG	1770.89
1	marcv_X1510_191.13673.13673.2	K.AAGISLIVPGK.S	tr|I3LMS2|I3LMS2_PIG	1024.63
0.9548	marcv_X1510_191.13694.13694.2	K.LAANDFFR.H	tr|F1RYY8|F1RYY8_PIG	952.477
0.9974	marcv_X1510_191.13703.13703.3	K.LALDVEIATYRK.L	tr|F1SGG2|F1SGG2_PIG,tr|F1SGG7|F1SGG7_PIG,tr|I3LLY8|I3LLY8_PIG,tr|F1SGG4|F1SGG4_PIG,tr|F1SGI7|F1SGI7_PIG,tr|F1SGG6|F1SGG6_PIG,tr|I3LDM6|I3LDM6_PIG,tr|F1SGG9|F1SGG9_PIG	1390.78
0.9813	marcv_X1510_191.13704.13704.3	R.LLRDYQELMNVK.L	tr|I3LDM6|I3LDM6_PIG,tr|F1SGG4|F1SGG4_PIG	1520.8
1	marcv_X1510_191.13706.13706.2	K.QIGENLIVPGGVK.T	tr|I3LJE2|I3LJE2_PIG,tr|I3LN38|I3LN38_PIG	1322.76
0.9195	marcv_X1510_191.13730.13730.2	K.QFHFSEM[147.04]VK.S	DECOY_tr|I3L6R7|I3L6R7_PIG_UNMAPPED	1167.54
1	marcv_X1510_191.13742.13742.3	K.FSM[147.04]PGFKGEGPEVDVNLPK.A	tr|I3L5D5|I3L5D5_PIG,tr|I3L5D5|I3L5D5_PIG,tr|I3L5D5|I3L5D5_PIG	2063
0.9148	marcv_X1510_191.13762.13762.2	K.FSM[147.04]PGFKGEGPEVDVNLPK.A	tr|I3L5D5|I3L5D5_PIG,tr|I3L5D5|I3L5D5_PIG,tr|I3L5D5|I3L5D5_PIG	2063
0.982	marcv_X1510_191.13770.13770.2	K.KNELFSNL.-	tr|B8XH67|B8XH67_PIG	963.503
0.9931	marcv_X1510_191.13772.13772.2	K.AIPNGFGTSPLTPSAR.L	tr|I3L7V2|I3L7V2_PIG,tr|F1SSA7|F1SSA7_PIG,tr|I3LFP0|I3LFP0_PIG	1584.83
0.9997	marcv_X1510_191.13787.13787.3	K.AAADLMAYC[160.03]EAHAK.E	tr|I3LJ42|I3LJ42_PIG	1520.68
0.9587	marcv_X1510_191.13796.13796.2	R.LKPLTLAYDGDADM[147.04].-	tr|I3L9B1|I3L9B1_PIG,tr|I3L9K6|I3L9K6_PIG,tr|F1SF66|F1SF66_PIG	1537.73
1	marcv_X1510_191.13803.13803.2	R.SGPFAPVLSATSR.G	tr|F1RNZ1|F1RNZ1_PIG	1288.68
0.9986	marcv_X1510_191.13806.13806.3	K.VPVVAPNPGDPWTGRELTNR.H	tr|F1SAH0|F1SAH0_PIG	2174.12
0.9999	marcv_X1510_191.13810.13810.3	R.TRPGSFQSLSDALSDAPAK.S	tr|F1SE09|F1SE09_PIG	1946.97
1	marcv_X1510_191.13816.13816.2	K.LAVNM[147.04]VPFPR.L	sp|Q767L7|TBB5_PIG,sp|P02554|TBB_PIG,tr|A5GFX6|A5GFX6_PIG,tr|F2Z5K5|F2Z5K5_PIG,tr|F1S6M7|F1S6M7_PIG,tr|F2Z5B2|F2Z5B2_PIG,tr|I3LBV1|I3LBV1_PIG,tr|F2Z571|F2Z571_PIG	1158.62
0.9965	marcv_X1510_191.13829.13829.2	R.NPLPPILGSPTK.A	tr|F1RFR1|F1RFR1_PIG	1232.71
1	marcv_X1510_191.13833.13833.2	K.VPVVAPNPGDPWTGR.E	tr|F1SAH0|F1SAH0_PIG	1560.8
0.9717	marcv_X1510_191.13846.13846.2	K.SLLNAFTK.K	tr|I3LJ01|I3LJ01_PIG	892.502
0.9874	marcv_X1510_191.13847.13847.2	K.DPLADLNIK.D	tr|F1RQM6|F1RQM6_PIG	997.544
0.9502	marcv_X1510_191.13855.13855.3	K.VNNSSLIGVGYTQTLRPGVK.L	sp|Q9MZ15|VDAC2_PIG,tr|F1S2F6|F1S2F6_PIG	2102.15
0.9931	marcv_X1510_191.13873.13873.4	R.VLRPPGGGSNFSLGFDEPTEQPVRR.N	tr|F1RVX2|F1RVX2_PIG	2711.38
0.965	marcv_X1510_191.13882.13882.3	K.VPVVAPNPGDPWTGR.E	tr|F1SAH0|F1SAH0_PIG	1560.8
0.9892	marcv_X1510_191.13891.13891.2	R.IIPGFM[147.04]C[160.03]QGGDFTR.H	sp|P62936|PPIA_PIG,tr|I3LE53|I3LE53_PIG	1613.73
0.9593	marcv_X1510_191.13895.13895.2	R.IPIPGAGITGK.T	DECOY_tr|F1RRQ0|F1RRQ0_PIG_UNMAPPED	1022.61
0.9859	marcv_X1510_191.13905.13905.2	K.LTFDTTFSPNTGK.K	sp|Q9MZ15|VDAC2_PIG,tr|F1S2F6|F1S2F6_PIG	1427.69
0.9963	marcv_X1510_191.13911.13911.2	R.AVLVDLEPGTM[147.04]DSVR.S	tr|F2Z5K5|F2Z5K5_PIG,tr|F2Z571|F2Z571_PIG	1616.81
0.9937	marcv_X1510_191.13924.13924.2	K.IISIFSSTEK.G	tr|F1SQW0|F1SQW0_PIG	1123.61
0.9996	marcv_X1510_191.13941.13941.3	K.DLPPFGINSPQALKK.L	tr|F1RTX9|F1RTX9_PIG	1623.9
1	marcv_X1510_191.13942.13942.2	K.RISEQFTAMFR.R	sp|Q767L7|TBB5_PIG,sp|P02554|TBB_PIG,tr|F2Z5K5|F2Z5K5_PIG,tr|F1S6M7|F1S6M7_PIG,tr|F2Z5B2|F2Z5B2_PIG,tr|F2Z571|F2Z571_PIG	1384.69
0.9993	marcv_X1510_191.13949.13949.3	K.LSDGVFKPDTFQGLK.N	tr|F1S6B4|F1S6B4_PIG	1650.86
0.9996	marcv_X1510_191.13950.13950.3	K.RISEQFTAMFR.R	sp|Q767L7|TBB5_PIG,sp|P02554|TBB_PIG,tr|F2Z5K5|F2Z5K5_PIG,tr|F1S6M7|F1S6M7_PIG,tr|F2Z5B2|F2Z5B2_PIG,tr|F2Z571|F2Z571_PIG	1384.69
0.9901	marcv_X1510_191.13954.13954.2	K.DLPPFGINSPQALKK.L	tr|F1RTX9|F1RTX9_PIG	1623.9
1	marcv_X1510_191.13964.13964.2	K.LSDGVFKPDTFQGLK.N	tr|F1S6B4|F1S6B4_PIG	1650.86
1	marcv_X1510_191.13990.13990.2	K.ISNYSYPASPESIELK.T	sp|Q35914|ATP8_PIG	1796.88
1	marcv_X1510_191.13991.13991.3	K.GARPGPGLLDNAIDPGSSAAQLPQK.S	tr|F1STL1|F1STL1_PIG	2429.27
0.9935	marcv_X1510_191.13992.13992.2	R.SLKPDFVLIR.Q	tr|B7TY10|B7TY10_PIG,tr|B7TY11|B7TY11_PIG	1186.71
0.9976	marcv_X1510_191.14001.14001.2	K.NLENSPLGEALR.S	tr|F1SE83|F1SE83_PIG	1311.68
0.9995	marcv_X1510_191.14003.14003.3	K.HLPGVITSPDEHILTPDSSLTK.S	tr|F1SI65|F1SI65_PIG,tr|I3LDT2|I3LDT2_PIG	2356.23
0.984	marcv_X1510_191.14012.14012.2	R.HNPTGAVLFMGQINKP.-	tr|Q8WNW8|Q8WNW8_PIG,tr|K7GMR8|K7GMR8_PIG	1722.89
0.9951	marcv_X1510_191.14014.14014.2	R.FSWGAEGQKPGFG.-	tr|I3LV79|I3LV79_PIG,sp|P81558|MBP_PIG,tr|I3LMX2|I3LMX2_PIG	1366.63
0.9718	marcv_X1510_191.14016.14016.4	K.HLPGVITSPDEHILTPDSSLTK.S	tr|F1SI65|F1SI65_PIG,tr|I3LDT2|I3LDT2_PIG	2356.23
1	marcv_X1510_191.14025.14025.3	K.RQTSGGPVDAGPEYQQDLDRELFK.L	sp|P13618|ATP5J_PIG,tr|I3L6G6|I3L6G6_PIG	2705.3
0.9977	marcv_X1510_191.14031.14031.2	R.QITINDLPVGR.S	tr|F1S3U9|F1S3U9_PIG,tr|F1SQ01|F1SQ01_PIG	1224.68
0.9745	marcv_X1510_191.14046.14046.3	K.WSGPLSLQEVDERPQHPLQVK.Y	tr|F1RKG8|F1RKG8_PIG	2442.27
0.9979	marcv_X1510_191.14054.14054.2	K.LTETC[160.03]FLDC[160.03]VK.D	tr|F1SSK4|F1SSK4_PIG	1384.64
0.9637	marcv_X1510_191.14061.14061.2	R.DLKPENLLLASK.S	sp|Q95266|KCC2D_PIG,tr|Q7JFN3|Q7JFN3_PIG,tr|Q7JFN2|Q7JFN2_PIG,tr|Q7JFN4|Q7JFN4_PIG,tr|I3LNG5|I3LNG5_PIG,tr|I3LSJ3|I3LSJ3_PIG,tr|I3LF11|I3LF11_PIG,tr|F1RL74|F1RL74_PIG	1339.77
0.9503	marcv_X1510_191.14082.14082.2	R.QHLLSLQQR.T	tr|F1S2T2|F1S2T2_PIG	1121.63
0.993	marcv_X1510_191.14096.14096.3	R.LVLEVAQHLGESTVR.T	tr|F1SLA0|F1SLA0_PIG,tr|K7GLT8|K7GLT8_PIG	1649.91
1	marcv_X1510_191.14103.14103.2	R.LVLEVAQHLGESTVR.T	tr|F1SLA0|F1SLA0_PIG,tr|K7GLT8|K7GLT8_PIG	1649.91
0.9699	marcv_X1510_191.14106.14106.2	K.THLPGFVEQAEALK.A	tr|F1RQP0|F1RQP0_PIG	1538.81
0.9658	marcv_X1510_191.14109.14109.2	K.GALDDAIAFGGK.T	tr|F1SJ90|F1SJ90_PIG	1133.57
0.9908	marcv_X1510_191.14115.14115.2	K.DPLADLNIK.D	tr|F1RQM6|F1RQM6_PIG	997.544
1	marcv_X1510_191.14118.14118.2	R.M[147.04]FLGFPTTK.T	sp|P01965|HBA_PIG,tr|K7GLP2|K7GLP2_PIG,tr|F1RGX4|F1RGX4_PIG	1056.53
0.9993	marcv_X1510_191.14141.14141.3	R.NLHQSGFSLSGAQIDDNIPR.R	tr|I3LJE2|I3LJE2_PIG	2168.06
0.9861	marcv_X1510_191.14147.14147.2	R.FEAPLFNAR.L	tr|F1SHD7|F1SHD7_PIG	1063.55
1	marcv_X1510_191.14157.14157.2	K.KVNLAELFK.G	tr|F1RQP0|F1RQP0_PIG	1060.63
0.9927	marcv_X1510_191.14165.14165.2	R.NLHQSGFSLSGAQIDDNIPR.R	tr|I3LJE2|I3LJE2_PIG	2168.06
0.989	marcv_X1510_191.14170.14170.2	R.DTGILDSLGR.F	tr|I3LMX2|I3LMX2_PIG	1045.54
0.9929	marcv_X1510_191.14203.14203.2	K.TAGTGGLSLLPPPPGGK.V	tr|I3LT39|I3LT39_PIG	1518.84
0.9625	marcv_X1510_191.14254.14254.3	R.RVPLSPLSLPAGPADAR.R	tr|I3L7H8|I3L7H8_PIG,tr|F1SFW7|F1SFW7_PIG	1715.97
1	marcv_X1510_191.14269.14269.2	R.DVLSSLPMKPC[160.03]PEAIK.E	sp|Q8WMQ3|CD9_PIG,tr|F1SL24|F1SL24_PIG,tr|K7GMI9|K7GMI9_PIG,tr|I3LPR3|I3LPR3_PIG	1783.92
0.9858	marcv_X1510_191.14300.14300.3	K.LSELDDRADALQAGASQFETSAAK.L	tr|F1SSX4|F1SSX4_PIG,tr|I3LVF9|I3LVF9_PIG	2493.2
0.9491	marcv_X1510_191.14314.14314.2	K.EAFSLFDKDGDGTITTK.E	tr|F2Z5G3|F2Z5G3_PIG,tr|F1S145|F1S145_PIG	1843.88
1	marcv_X1510_191.14321.14321.3	R.TLEPVRPPVVPNDYVPSPTR.N	tr|I3LIA5|I3LIA5_PIG	2232.19
0.9953	marcv_X1510_191.14323.14323.5	K.LPPGKPGVGDVPRPFSPPIHSSSPPPIAPLAR.A	tr|I3LIV1|I3LIV1_PIG	3236.78
1	marcv_X1510_191.14342.14342.2	K.VDIEAPDVSLEGPEGK.L	tr|I3L5D5|I3L5D5_PIG	1653.81
1	marcv_X1510_191.14360.14360.2	M.AGPETDAQFQFTGIK.K	tr|F1RFD4|F1RFD4_PIG	1608.78
0.9927	marcv_X1510_191.14366.14366.2	R.TLEPVRPPVVPNDYVPSPTR.N	tr|I3LIA5|I3LIA5_PIG	2232.19
1	marcv_X1510_191.14375.14375.2	K.SPSSPQQQQQVLNILK.S	tr|F1RK46|F1RK46_PIG	1793.96
0.9854	marcv_X1510_191.14383.14383.2	K.DPLADLNIK.D	tr|F1RQM6|F1RQM6_PIG	997.544
0.9999	marcv_X1510_191.14388.14388.3	M.AGPETDAQFQFTGIK.K	tr|F1RFD4|F1RFD4_PIG	1608.78
0.9999	marcv_X1510_191.14389.14389.3	K.VDIDAPDVDVHGPDWHLK.M	tr|I3L5D5|I3L5D5_PIG	2026.97
1	marcv_X1510_191.14396.14396.2	R.M[147.04]FLGFPTTK.T	sp|P01965|HBA_PIG,tr|K7GLP2|K7GLP2_PIG,tr|F1RGX4|F1RGX4_PIG	1056.53
0.9643	marcv_X1510_191.14399.14399.4	K.VDIDAPDVDVHGPDWHLK.M	tr|I3L5D5|I3L5D5_PIG	2026.97
0.9548	marcv_X1510_191.14403.14403.3	R.NC[160.03]WQNYLDFHR.C	tr|F1RLH7|F1RLH7_PIG	1551.67
1	marcv_X1510_191.14413.14413.2	K.FFLC[160.03]QVAGDAK.D	tr|F1SM72|F1SM72_PIG,tr|K7GR86|K7GR86_PIG,tr|K7GMV4|K7GMV4_PIG	1254.61
0.9965	marcv_X1510_191.14429.14429.3	K.LSLPPHEGPGSELAAGALYR.K	tr|F1SNT8|F1SNT8_PIG	2034.05
0.9914	marcv_X1510_191.14448.14448.2	R.DTGILDSLGR.F	tr|I3LMX2|I3LMX2_PIG	1045.54
1	marcv_X1510_191.14474.14474.2	K.TAGTGGLSLLPPPPGGK.V	tr|I3LT39|I3LT39_PIG	1518.84
0.9937	marcv_X1510_191.14476.14476.2	K.LTPEQLQFMR.Q	tr|F1S1F3|F1S1F3_PIG	1261.65
0.9933	marcv_X1510_191.14485.14485.3	K.VTIPPPSSSVAISNHVTPPPIPK.S	tr|I3LT39|I3LT39_PIG	2334.29
0.9993	marcv_X1510_191.14503.14503.3	R.DVLSSLPMKPC[160.03]PEAIK.E	sp|Q8WMQ3|CD9_PIG,tr|F1SL24|F1SL24_PIG,tr|K7GMI9|K7GMI9_PIG,tr|I3LPR3|I3LPR3_PIG	1783.92
1	marcv_X1510_191.14505.14505.2	R.TSPAGGTWSSVVSGVPR.L	tr|F1RMZ0|F1RMZ0_PIG,tr|I3LGU8|I3LGU8_PIG	1643.83
0.9847	marcv_X1510_191.14506.14506.3	K.TDEFQLHTNVNDGTEFGGSIYQK.V	sp|Q9MZ16|VDAC1_PIG	2599.18
0.9974	marcv_X1510_191.14539.14539.2	R.DVLSSLPMKPC[160.03]PEAIK.E	sp|Q8WMQ3|CD9_PIG,tr|F1SL24|F1SL24_PIG,tr|K7GMI9|K7GMI9_PIG,tr|I3LPR3|I3LPR3_PIG	1783.92
1	marcv_X1510_191.14540.14540.2	K.LSELDDRADALQAGASQFETSAAK.L	tr|F1SSX4|F1SSX4_PIG,tr|I3LVF9|I3LVF9_PIG	2493.2
0.9567	marcv_X1510_191.14567.14567.2	R.SLPPDTFLGAAAR.L	tr|I3LBN7|I3LBN7_PIG	1314.69
0.9962	marcv_X1510_191.14569.14569.2	K.IPSWQIPVK.S	tr|F1RHS6|F1RHS6_PIG	1066.62
1	marcv_X1510_191.14578.14578.3	K.LSELDDRADALQAGASQFETSAAK.L	tr|F1SSX4|F1SSX4_PIG,tr|I3LVF9|I3LVF9_PIG	2493.2
0.9986	marcv_X1510_191.14591.14591.5	K.LPPGKPGVGDVPRPFSPPIHSSSPPPIAPLAR.A	tr|I3LIV1|I3LIV1_PIG	3236.78
1	marcv_X1510_191.14594.14594.2	K.GGIGDAFLYR.A	tr|F1RQI1|F1RQI1_PIG	1067.54
0.9838	marcv_X1510_191.14595.14595.2	K.SFENFIVR.F	tr|F1SCC7|F1SCC7_PIG,tr|F1SCD1|F1SCD1_PIG	1010.52
1	marcv_X1510_191.14596.14596.3	K.LSELDDRADALQAGASQFESSAAK.L	tr|F1SL42|F1SL42_PIG	2479.18
0.9553	marcv_X1510_191.14609.14609.3	K.AAADLM[147.04]AYC[160.03]EAHAK.E	tr|I3LJ42|I3LJ42_PIG	1536.67
1	marcv_X1510_191.14620.14620.2	K.VLYSPISPLSPGK.A	tr|F1SBX0|F1SBX0_PIG,tr|I3LNF0|I3LNF0_PIG,tr|I3LFI1|I3LFI1_PIG	1356.77
0.9937	marcv_X1510_191.14633.14633.2	K.VFLENVIR.D	sp|P62802|H4_PIG	988.571
0.9927	marcv_X1510_191.14644.14644.3	R.IHLPLNYPPGSPDLGR.H	tr|I3L7J4|I3L7J4_PIG	1744.93
0.9973	marcv_X1510_191.14660.14660.3	R.APPPVAYNPIHSPSYPLAAVK.S	tr|F1S156|F1S156_PIG	2188.17
0.9969	marcv_X1510_191.14664.14664.2	K.YSFHPVEDFPAPEEYK.H	tr|F1RXC5|F1RXC5_PIG	1953.88
0.9997	marcv_X1510_191.14666.14666.3	K.YSFHPVEDFPAPEEYK.H	tr|F1RXC5|F1RXC5_PIG	1953.88
0.9844	marcv_X1510_191.14676.14676.2	R.NLVDSYM[147.04]AIVNK.T	tr|F1RRW8|F1RRW8_PIG,tr|I3LCZ7|I3LCZ7_PIG	1381.69
0.9997	marcv_X1510_191.14677.14677.3	K.HQAQIDQYLGLVR.T	tr|I3LBH0|I3LBH0_PIG,tr|I3L6J1|I3L6J1_PIG	1539.82
1	marcv_X1510_191.14682.14682.2	K.HQAQIDQYLGLVR.T	tr|I3LBH0|I3LBH0_PIG,tr|I3L6J1|I3L6J1_PIG	1539.82
1	marcv_X1510_191.14685.14685.2	R.LLLAYAYTGR.M	tr|I3LUX6|I3LUX6_PIG,tr|I3LS86|I3LS86_PIG	1139.63
1	marcv_X1510_191.14699.14699.2	K.EWLC[160.03]LNC[160.03]QMQR.A	tr|F1SBX0|F1SBX0_PIG,tr|I3LNF0|I3LNF0_PIG,tr|I3LFI1|I3LFI1_PIG,tr|I3L5R1|I3L5R1_PIG	1536.66
0.9592	marcv_X1510_191.14711.14711.4	K.RLGLPIAEGAQPSLPTPGSPPDRELK.S	tr|F1SHR1|F1SHR1_PIG	2695.47
1	marcv_X1510_191.14712.14712.2	R.GM[147.04]EDLIPLVNR.L	tr|F1RRW8|F1RRW8_PIG	1271.65
1	marcv_X1510_191.14724.14724.2	K.TSIAIDTIINQK.R	sp|P80021|ATPA_PIG,tr|F1RPS8|F1RPS8_PIG	1315.73
0.9104	marcv_X1510_191.14730.14730.2	R.DVLSSLPM[147.04]KPC[160.03]PEAIK.E	sp|Q8WMQ3|CD9_PIG,tr|F1SL24|F1SL24_PIG,tr|K7GMI9|K7GMI9_PIG,tr|I3LPR3|I3LPR3_PIG	1799.92
0.9905	marcv_X1510_191.14738.14738.2	K.EAFSLFDK.D	tr|F2Z5G3|F2Z5G3_PIG,tr|F1S145|F1S145_PIG	955.465
1	marcv_X1510_191.14739.14739.2	K.QTFPFSTTIESEK.R	tr|F1SN53|F1SN53_PIG	1513.73
0.9366	marcv_X1510_191.14755.14755.2	K.TAGTGGLSLLPPPPGGK.V	tr|I3LT39|I3LT39_PIG	1518.84
1	marcv_X1510_191.14763.14763.2	R.VPTPNVSVVDLTC[160.03]R.L	sp|P00355|G3P_PIG,tr|F1SLR8|F1SLR8_PIG	1555.8
1	marcv_X1510_191.14791.14791.3	K.VNNSSLIGLGYTQTLKPGIK.L	sp|Q9MZ16|VDAC1_PIG	2102.17
0.9684	marcv_X1510_191.14799.14799.2	K.TTFEDLIQR.C	tr|F1RVD4|F1RVD4_PIG	1121.57
0.9957	marcv_X1510_191.14804.14804.2	K.GFGFGQGAGALVHSE.-	tr|I3LL97|I3LL97_PIG	1432.67
1	marcv_X1510_191.14806.14806.2	K.VNNSSLIGLGYTQTLKPGIK.L	sp|Q9MZ16|VDAC1_PIG	2102.17
0.9931	marcv_X1510_191.14809.14809.2	K.ESVPEFPLSPPK.K	sp|Q6DUB7|STMN1_PIG	1325.69
0.979	marcv_X1510_191.14822.14822.2	R.AISVSAPVFYAPQK.K	tr|F1SRV9|F1SRV9_PIG	1476.8
0.9932	marcv_X1510_191.14826.14826.2	K.GLFPENFTR.R	tr|I3L8X6|I3L8X6_PIG	1079.54
1	marcv_X1510_191.14829.14829.2	K.SIWSVSTPSPIK.S	tr|K7GSS3|K7GSS3_PIG,tr|K7GNQ7|K7GNQ7_PIG,tr|F1RG02|F1RG02_PIG	1300.7
1	marcv_X1510_191.14842.14842.2	R.FVNVVPTFGK.K	sp|P62863|RS30_PIG,tr|F1RQU9|F1RQU9_PIG	1106.61
0.9996	marcv_X1510_191.14844.14844.3	R.ALIDPSSGLPNRLPPGAVPPGAR.F	tr|F1S870|F1S870_PIG	2251.24
1	marcv_X1510_191.14847.14847.2	R.DQGPVIAEPPQIQGPGVPEPAK.T	tr|F1SUM1|F1SUM1_PIG	2223.15
1	marcv_X1510_191.14849.14849.2	K.STQLLQAAAAEASLNK.S	sp|F1SPM8|AAK1_PIG,tr|I3L548|I3L548_PIG	1614.86
0.9998	marcv_X1510_191.14856.14856.3	R.DQGPVIAEPPQIQGPGVPEPAK.T	tr|F1SUM1|F1SUM1_PIG	2223.15
0.9958	marcv_X1510_191.14867.14867.2	R.AILVDLEPGTM[147.04]DSVR.S	sp|Q767L7|TBB5_PIG,sp|P02554|TBB_PIG,tr|F1S6M7|F1S6M7_PIG,tr|F2Z5B2|F2Z5B2_PIG	1630.82
1	marcv_X1510_191.14868.14868.3	R.SLNPALDGLTC[160.03]GLTSHDK.R	tr|F1S5Y8|F1S5Y8_PIG	1897.92
1	marcv_X1510_191.14874.14874.3	K.LSELDDRADALQAGASQFETSAAK.L	tr|F1SSX4|F1SSX4_PIG,tr|I3LVF9|I3LVF9_PIG	2493.2
0.9973	marcv_X1510_191.14875.14875.2	K.AQMTNILQQIK.T	tr|F1SB99|F1SB99_PIG	1286.7
0.9789	marcv_X1510_191.14882.14882.3	R.AILVDLEPGTM[147.04]DSVR.S	sp|Q767L7|TBB5_PIG,sp|P02554|TBB_PIG,tr|F1S6M7|F1S6M7_PIG,tr|F2Z5B2|F2Z5B2_PIG	1630.82
0.9539	marcv_X1510_191.14883.14883.3	R.ARFEELNADLFR.G	tr|F1SA70|F1SA70_PIG,tr|F1S9Q3|F1S9Q3_PIG,tr|F1S9Q1|F1S9Q1_PIG	1479.75
1	marcv_X1510_191.14886.14886.2	K.TITLEVEPSDTIENVK.A	sp|P63053|RL40_PIG,sp|P0CG68|UBC_PIG,sp|P0CG68|UBC_PIG,sp|P0CG68|UBC_PIG,sp|P0CG68|UBC_PIG,tr|A7U5U2|A7U5U2_PIG,tr|F2Z5U0|F2Z5U0_PIG	1786.92
0.9974	marcv_X1510_191.14895.14895.2	R.NNLAGAEELFAR.K	tr|I3LGD4|I3LGD4_PIG	1303.65
0.9454	marcv_X1510_191.14900.14900.2	R.ARFEELNADLFR.G	tr|F1SA70|F1SA70_PIG,tr|F1S9Q3|F1S9Q3_PIG,tr|F1S9Q1|F1S9Q1_PIG	1479.75
0.9961	marcv_X1510_191.14906.14906.2	K.FNPETDFLTGK.D	sp|P16276|ACON_PIG,tr|F1SRC5|F1SRC5_PIG	1267.61
0.9971	marcv_X1510_191.14919.14919.2	K.VVDLLAPYAK.G	tr|F1SLA0|F1SLA0_PIG	1087.63
0.9508	marcv_X1510_191.14921.14921.2	K.LLDELIAER.T	DECOY_tr|I3LCL6|I3LCL6_PIG_UNMAPPED	1070.6
0.997	marcv_X1510_191.14934.14934.2	K.DTGTVLFLGK.V	tr|F1SCD0|F1SCD0_PIG	1049.58
0.9786	marcv_X1510_191.14940.14940.4	R.SLHLSPNNFFFGHSPTSK.A	sp|Q29548|HEXB_PIG,tr|D0G6X8|D0G6X8_PIG	2015.99
0.9692	marcv_X1510_191.14946.14946.4	K.VDVDVPDVDVHGPDWHLK.M	tr|I3L5D5|I3L5D5_PIG,tr|I3L5D5|I3L5D5_PIG,tr|I3L5D5|I3L5D5_PIG	2040.99
0.9999	marcv_X1510_191.14949.14949.3	K.VDVDVPDVDVHGPDWHLK.M	tr|I3L5D5|I3L5D5_PIG,tr|I3L5D5|I3L5D5_PIG,tr|I3L5D5|I3L5D5_PIG	2040.99
0.9999	marcv_X1510_191.14950.14950.3	K.LQVC[160.03]NLC[160.03]GFNPTPHLVEK.T	tr|I3L5R1|I3L5R1_PIG	2125.04
1	marcv_X1510_191.14953.14953.3	R.SLHLSPNNFFFGHSPTSK.A	sp|Q29548|HEXB_PIG,tr|D0G6X8|D0G6X8_PIG	2015.99
0.9146	marcv_X1510_191.14960.14960.3	R.DVLSSLPMKPC[160.03]PEAIK.E	sp|Q8WMQ3|CD9_PIG,tr|F1SL24|F1SL24_PIG,tr|K7GMI9|K7GMI9_PIG,tr|I3LPR3|I3LPR3_PIG	1783.92
0.9996	marcv_X1510_191.14961.14961.3	R.HSLPFSLPSQMEPR.T	tr|F1SAH0|F1SAH0_PIG	1624.8
0.9753	marcv_X1510_191.14963.14963.2	K.GFGFGLVK.L	sp|Q9MZ15|VDAC2_PIG,tr|F1S2F6|F1S2F6_PIG	823.459
1	marcv_X1510_191.14971.14971.3	R.ESLSGQAAGRPLVASVGLNVPASVR.Y	tr|F1RNZ1|F1RNZ1_PIG	2434.33
1	marcv_X1510_191.14972.14972.2	R.DVLSSLPMKPC[160.03]PEAIK.E	sp|Q8WMQ3|CD9_PIG,tr|F1SL24|F1SL24_PIG,tr|K7GMI9|K7GMI9_PIG,tr|I3LPR3|I3LPR3_PIG	1783.92
1	marcv_X1510_191.14984.14984.3	R.NC[160.03]WQNYLDFHR.C	tr|F1RLH7|F1RLH7_PIG	1551.67
1	marcv_X1510_191.14985.14985.5	K.AAADLM[147.04]AYC[160.03]EAHAKEDPLLTPVPASENPFREK.K	tr|I3LJ42|I3LJ42_PIG	3556.7
0.9943	marcv_X1510_191.14986.14986.2	R.SPSWDPFR.D	sp|Q5S1U1|HSPB1_PIG	990.456
1	marcv_X1510_191.14987.14987.2	R.NC[160.03]WQNYLDFHR.C	tr|F1RLH7|F1RLH7_PIG	1551.67
0.952	marcv_X1510_191.14991.14991.4	K.AAADLM[147.04]AYC[160.03]EAHAKEDPLLTPVPASENPFREK.K	tr|I3LJ42|I3LJ42_PIG	3556.7
0.9996	marcv_X1510_191.14997.14997.3	R.VLLVIDEPHTDWAK.Y	tr|B7TY10|B7TY10_PIG,tr|B7TY11|B7TY11_PIG	1634.87
0.9969	marcv_X1510_191.15003.15003.2	R.VTLPAGPDILR.T	tr|C3UP60|C3UP60_PIG	1150.67
1	marcv_X1510_191.15023.15023.3	R.LGEHNIDVLEGNEQFINAAK.L	sp|P00761|TRYP_PIG,tr|F1SRS2|F1SRS2_PIG	2210.1
0.9991	marcv_X1510_191.15025.15025.3	K.EDPLLTPVPASENPFREK.K	tr|I3LJ42|I3LJ42_PIG	2038.04
1	marcv_X1510_191.15031.15031.2	K.AAEDEEVPAFFK.N	tr|I3LJE2|I3LJE2_PIG	1351.63
1	marcv_X1510_191.15034.15034.2	R.VM[147.04]VSALPGFQPVGPK.D	tr|F1SCH7|F1SCH7_PIG	1541.83
0.991	marcv_X1510_191.15035.15035.2	K.TIIPLISQC[160.03]TPK.V	sp|P00346|MDHM_PIG,tr|I3LP41|I3LP41_PIG	1369.76
1	marcv_X1510_191.15036.15036.2	R.LGEHNIDVLEGNEQFINAAK.L	sp|P00761|TRYP_PIG,tr|F1SRS2|F1SRS2_PIG	2210.1
1	marcv_X1510_191.15047.15047.2	K.SNINMYSSSLPFK.S	tr|K7GSS3|K7GSS3_PIG,tr|K7GNQ7|K7GNQ7_PIG,tr|F1RG02|F1RG02_PIG	1486.71
0.9963	marcv_X1510_191.15055.15055.3	R.GPLRPFVPEQELLR.S	sp|Q767K7|ATAT_PIG,tr|K7GRQ5|K7GRQ5_PIG,tr|K7GQ14|K7GQ14_PIG,tr|I3L925|I3L925_PIG,tr|K7GKP0|K7GKP0_PIG,tr|K7GS33|K7GS33_PIG,tr|K7GR62|K7GR62_PIG,tr|K7GNW1|K7GNW1_PIG	1649.93
0.9723	marcv_X1510_191.15063.15063.2	R.LVPLLPVR.T	tr|F1RWL8|F1RWL8_PIG	905.606
0.9633	marcv_X1510_191.15072.15072.3	K.AAADLM[147.04]AYC[160.03]EAHAKEDPLLTPVPASENPFREK.K	tr|I3LJ42|I3LJ42_PIG	3556.7
0.983	marcv_X1510_191.15077.15077.2	K.VLVPLATPSVSVR.G	tr|F1RGJ6|F1RGJ6_PIG	1336.81
1	marcv_X1510_191.15085.15085.2	K.TVTAM[147.04]DVVYALK.R	sp|P62802|H4_PIG	1325.69
1	marcv_X1510_191.15102.15102.3	K.VSQAAAELLAFC[160.03]EAHAK.D	tr|I3LM81|I3LM81_PIG	1814.9
1	marcv_X1510_191.15103.15103.2	K.LTLSALVDGK.S	sp|Q9MZ15|VDAC2_PIG,tr|F1S2F6|F1S2F6_PIG	1015.59
0.9582	marcv_X1510_191.15105.15105.2	R.TNFGLVEINGGVR.Q	DECOY_tr|F1ST12|F1ST12_PIG_UNMAPPED	1374.73
1	marcv_X1510_191.15112.15112.2	K.VSQAAAELLAFC[160.03]EAHAK.D	tr|I3LM81|I3LM81_PIG	1814.9
1	marcv_X1510_191.15121.15121.2	R.EIFGM[147.04]SIQEFDK.L	tr|F1S4V5|F1S4V5_PIG	1458.67
0.9374	marcv_X1510_191.15122.15122.2	K.DVLEDIPKWEGK.Q	tr|F1SSS6|F1SSS6_PIG	1427.73
0.9809	marcv_X1510_191.15141.15141.2	R.GAPPLPPILR.-	tr|F1RXC5|F1RXC5_PIG	1029.63
1	marcv_X1510_191.15142.15142.2	R.IAEFAFEYAR.N	tr|F1RKU0|F1RKU0_PIG	1215.59
1	marcv_X1510_191.15156.15156.2	K.GM[147.04]NTLVGYDLVPEPK.L	tr|F1SJ34|F1SJ34_PIG	1647.82
0.9878	marcv_X1510_191.15161.15161.2	K.GVLLFGPPGTGK.T	tr|I3LJ30|I3LJ30_PIG,tr|F1SB53|F1SB53_PIG	1141.65
0.9764	marcv_X1510_191.15181.15181.2	K.VSMPDIDLNLK.G	tr|I3L5D5|I3L5D5_PIG	1243.65
0.9569	marcv_X1510_191.15183.15183.2	R.ALTQPLGLLR.L	tr|F1RNK3|F1RNK3_PIG	1080.67
0.997	marcv_X1510_191.15196.15196.2	K.SSLFLAPSALK.L	tr|K7GSS3|K7GSS3_PIG,tr|K7GNQ7|K7GNQ7_PIG,tr|F1RG02|F1RG02_PIG	1132.65
0.9975	marcv_X1510_191.15203.15203.2	R.ALDDFVLGSAR.L	tr|K7GQM4|K7GQM4_PIG,tr|F1RW55|F1RW55_PIG	1162.6
0.9826	marcv_X1510_191.15210.15210.2	K.LIIWDSYTTNK.V	tr|I3LSK5|I3LSK5_PIG,tr|F2Z4Z8|F2Z4Z8_PIG	1352.7
0.9643	marcv_X1510_191.15234.15234.2	K.FLANVSTVLTSK.Y	sp|P01965|HBA_PIG,tr|K7GLP2|K7GLP2_PIG,tr|K7GQP8|K7GQP8_PIG,tr|K7GM56|K7GM56_PIG,tr|F1RGX4|F1RGX4_PIG	1278.72
0.9885	marcv_X1510_191.15239.15239.3	R.DVLSSLPMKPC[160.03]PEAIK.E	sp|Q8WMQ3|CD9_PIG,tr|F1SL24|F1SL24_PIG,tr|K7GMI9|K7GMI9_PIG,tr|I3LPR3|I3LPR3_PIG	1783.92
0.9978	marcv_X1510_191.15252.15252.2	R.DVLSSLPMKPC[160.03]PEAIK.E	sp|Q8WMQ3|CD9_PIG,tr|F1SL24|F1SL24_PIG,tr|K7GMI9|K7GMI9_PIG,tr|I3LPR3|I3LPR3_PIG	1783.92
1	marcv_X1510_191.15264.15264.5	K.AAADLM[147.04]AYC[160.03]EAHAKEDPLLTPVPASENPFREK.K	tr|I3LJ42|I3LJ42_PIG	3556.7
0.9962	marcv_X1510_191.15266.15266.2	R.IALM[147.04]PLFQAEK.D	tr|F1S6Q1|F1S6Q1_PIG	1275.69
1	marcv_X1510_191.15300.15300.3	K.EDPLLTPVPASENPFREK.K	tr|I3LJ42|I3LJ42_PIG	2038.04
0.9966	marcv_X1510_191.15308.15308.2	R.DTQSIIFLGK.V	tr|F1SCC7|F1SCC7_PIG,tr|F1SCD1|F1SCD1_PIG	1120.61
0.9962	marcv_X1510_191.15322.15322.2	R.LAEQIATLC[160.03]ATLK.E	tr|F1RS11|F1RS11_PIG	1430.78
1	marcv_X1510_191.15328.15328.2	K.EDPLLTPVPASENPFREK.K	tr|I3LJ42|I3LJ42_PIG	2038.04
1	marcv_X1510_191.15335.15335.2	R.FTQAGSEVSALLGR.L	tr|F1SLA0|F1SLA0_PIG	1434.75
1	marcv_X1510_191.15344.15344.3	K.DDPLVTPVPAAENPFRDK.R	tr|I3LM81|I3LM81_PIG	1980
0.9963	marcv_X1510_191.15346.15346.3	K.LSELDDRADALQAGASQFETSAAK.L	tr|F1SSX4|F1SSX4_PIG,tr|I3LVF9|I3LVF9_PIG	2493.2
0.9668	marcv_X1510_191.15358.15358.2	K.ATSPLIEETPIGSIK.D	tr|F1S146|F1S146_PIG	1554.85
0.9608	marcv_X1510_191.15374.15374.3	R.LGEHNIDVLEGNEQFINAAK.L	sp|P00761|TRYP_PIG,tr|F1SRS2|F1SRS2_PIG	2210.1
1	marcv_X1510_191.15385.15385.2	R.IAEESNFPFIK.L	tr|F1RRS3|F1RRS3_PIG,tr|I3LTE8|I3LTE8_PIG	1293.66
0.9978	marcv_X1510_191.15423.15423.2	K.GAILTTMLVSR.N	tr|Q7JFN3|Q7JFN3_PIG,tr|Q7JFN2|Q7JFN2_PIG,tr|Q7JFN4|Q7JFN4_PIG	1160.66
0.9775	marcv_X1510_191.15424.15424.2	K.VVNIIPVIAK.A	tr|F1SJQ3|F1SJQ3_PIG	1064.7
0.9691	marcv_X1510_191.15437.15437.3	R.QEPEPGPSVDPDLTPPAVPPRVPIPQSK.G	tr|F1SI65|F1SI65_PIG,tr|I3LDT2|I3LDT2_PIG	2943.53
0.94	marcv_X1510_191.15451.15451.3	K.VNNSSLIGLGYTQTLKPGIK.L	sp|Q9MZ16|VDAC1_PIG	2102.17
0.9838	marcv_X1510_191.15511.15511.3	K.LISPAMVPSGTGGPVPGGSGAASSPAVVPTR.T	tr|F1RS74|F1RS74_PIG,tr|F1RS65|F1RS65_PIG	2773.44
0.9882	marcv_X1510_191.15526.15526.5	K.AAADLM[147.04]AYC[160.03]EAHAKEDPLLTPVPASENPFREK.K	tr|I3LJ42|I3LJ42_PIG	3556.7
1	marcv_X1510_191.15565.15565.3	K.EDPLLTPVPASENPFREK.K	tr|I3LJ42|I3LJ42_PIG	2038.04
0.9864	marcv_X1510_191.15582.15582.4	K.LLSHC[160.03]LLVTLAAHHPDDFNPSVHASLDK.F	sp|P01965|HBA_PIG,tr|K7GLP2|K7GLP2_PIG,tr|K7GQP8|K7GQP8_PIG,tr|K7GM56|K7GM56_PIG,tr|F1RGX4|F1RGX4_PIG	3106.57
1	marcv_X1510_191.15591.15591.2	K.EDPLLTPVPASENPFREK.K	tr|I3LJ42|I3LJ42_PIG	2038.04
1	marcv_X1510_191.15608.15608.3	K.LLSHC[160.03]LLVTLAAHHPDDFNPSVHASLDK.F	sp|P01965|HBA_PIG,tr|K7GLP2|K7GLP2_PIG,tr|K7GQP8|K7GQP8_PIG,tr|K7GM56|K7GM56_PIG,tr|F1RGX4|F1RGX4_PIG	3106.57
1	marcv_X1510_191.15620.15620.3	K.GPVREGDVLTLLESEREAR.R	sp|Q6QAT1|RS28_PIG	2125.11
1	marcv_X1510_191.15621.15621.2	K.GVGIISEGNETVEDIAAR.L	sp|P05024|AT1A1_PIG,sp|D2WKD8|AT1A2_PIG,tr|F1RGF9|F1RGF9_PIG,tr|F1SAX3|F1SAX3_PIG,tr|I3LT88|I3LT88_PIG	1828.92
1	marcv_X1510_191.15633.15633.2	K.FLANVSTVLTSK.Y	sp|P01965|HBA_PIG,tr|K7GLP2|K7GLP2_PIG,tr|K7GQP8|K7GQP8_PIG,tr|K7GM56|K7GM56_PIG,tr|F1RGX4|F1RGX4_PIG	1278.72
0.9937	marcv_X1510_191.15634.15634.2	R.IITGPAPVLPPAALR.T	sp|Q5W9D5|QKI_PIG,tr|F1SBW4|F1SBW4_PIG	1484.91
1	marcv_X1510_191.15656.15656.2	K.DTLGSPLAVDEALK.R	tr|F1SHR1|F1SHR1_PIG	1427.75
0.9873	marcv_X1510_191.15660.15660.2	R.VLITTDLLAR.G	tr|A6M930|A6M930_PIG,tr|A6M928|A6M928_PIG,tr|I3LLD5|I3LLD5_PIG	1113.68
0.9906	marcv_X1510_191.15678.15678.3	K.VDISAPDVEVHGPEWNLK.M	tr|I3L5D5|I3L5D5_PIG	2004
0.95	marcv_X1510_191.15685.15685.2	K.VDIDVPDVNIEGPDAK.L	tr|I3L5D5|I3L5D5_PIG	1694.84
0.9105	marcv_X1510_191.15692.15692.2	K.VDISAPDVEVHGPEWNLK.M	tr|I3L5D5|I3L5D5_PIG	2004
0.9967	marcv_X1510_191.15715.15715.2	R.AAFTAFEEAQLPR.L	tr|F1S924|F1S924_PIG	1449.73
1	marcv_X1510_191.15750.15750.2	K.VQIAVANAQELLQR.M	tr|I3LS73|I3LS73_PIG	1551.87
1	marcv_X1510_191.15752.15752.2	R.SIEVENDFLPVEK.T	tr|K7GMW4|K7GMW4_PIG,tr|K7GNB1|K7GNB1_PIG,tr|K7GMJ9|K7GMJ9_PIG,tr|F1SQN7|F1SQN7_PIG	1517.76
0.9935	marcv_X1510_191.15789.15789.2	R.MFLGFPTTK.T	sp|P01965|HBA_PIG,tr|K7GLP2|K7GLP2_PIG,tr|F1RGX4|F1RGX4_PIG	1040.54
1	marcv_X1510_191.15802.15802.2	K.LAVNMVPFPR.L	sp|Q767L7|TBB5_PIG,sp|P02554|TBB_PIG,tr|A5GFX6|A5GFX6_PIG,tr|F2Z5K5|F2Z5K5_PIG,tr|F1S6M7|F1S6M7_PIG,tr|F2Z5B2|F2Z5B2_PIG,tr|I3LBV1|I3LBV1_PIG,tr|F2Z571|F2Z571_PIG	1142.63
0.964	marcv_X1510_191.15839.15839.3	K.EDPLLTPVPASENPFREK.K	tr|I3LJ42|I3LJ42_PIG	2038.04
0.9572	marcv_X1510_191.15853.15853.2	K.ATFSPIVTLEPR.R	tr|F1S146|F1S146_PIG	1329.73
0.9977	marcv_X1510_191.15856.15856.2	K.QLIVELVVNK.M	tr|B7TY10|B7TY10_PIG,tr|B7TY11|B7TY11_PIG	1153.71
1	marcv_X1510_191.15862.15862.2	K.SQLLDLGGPPLSSPGR.S	tr|I3LVP6|I3LVP6_PIG	1592.85
0.9926	marcv_X1510_191.15868.15868.3	R.NDPLLVGVPASENPFKDK.K	tr|I3LKQ1|I3LKQ1_PIG	1939.01
1	marcv_X1510_191.15871.15871.2	K.SSGSEGSSPNWLQALK.L	tr|I3LGJ5|I3LGJ5_PIG,tr|I3LAB3|I3LAB3_PIG	1646.79
0.9592	marcv_X1510_191.15875.15875.2	R.AVLVDLEPGTMDSVR.S	tr|F2Z5K5|F2Z5K5_PIG,tr|F2Z571|F2Z571_PIG	1600.81
1	marcv_X1510_191.15897.15897.2	R.GQPLPETLQLAVQGK.R	tr|F1SJG5|F1SJG5_PIG	1577.88
0.9256	marcv_X1510_191.15900.15900.2	R.NDPLLVGVPASENPFKDK.K	tr|I3LKQ1|I3LKQ1_PIG	1939.01
0.9943	marcv_X1510_191.15904.15904.2	R.IITGPAPVLPPAALR.T	sp|Q5W9D5|QKI_PIG,tr|F1SBW4|F1SBW4_PIG	1484.91
0.9848	marcv_X1510_191.15952.15952.3	K.ANFNTC[160.03]TEC[160.03]QTTVC[160.03]SLC[160.03]GFNPNPHLTEIK.E	tr|F1SBX0|F1SBX0_PIG,tr|I3LNF0|I3LNF0_PIG,tr|I3LFI1|I3LFI1_PIG	3412.49
1	marcv_X1510_191.15959.15959.2	K.RTGAIVDVPVGEELLGR.V	sp|P80021|ATPA_PIG,tr|F1RPS8|F1RPS8_PIG	1779.98
1	marcv_X1510_191.15960.15960.4	K.ANFNTC[160.03]TEC[160.03]QTTVC[160.03]SLC[160.03]GFNPNPHLTEIK.E	tr|F1SBX0|F1SBX0_PIG,tr|I3LNF0|I3LNF0_PIG,tr|I3LFI1|I3LFI1_PIG	3412.49
1	marcv_X1510_191.15968.15968.3	K.SQSLTNAFNLPEPAPPRPSLSQDEVK.A	tr|B7TY10|B7TY10_PIG	2821.42
1	marcv_X1510_191.15971.15971.2	K.SLNNQFASFIDK.V	tr|F1SGG3|F1SGG3_PIG	1382.68
1	marcv_X1510_191.15997.15997.2	R.YLTVAAVFR.G	sp|Q767L7|TBB5_PIG,sp|P02554|TBB_PIG,tr|F2Z5K5|F2Z5K5_PIG,tr|F2Z571|F2Z571_PIG	1038.59
0.9508	marcv_X1510_191.16009.16009.2	K.LNPADAPNPVVFVATK.D	tr|F1RPX1|F1RPX1_PIG	1651.89
0.9927	marcv_X1510_191.16010.16010.2	R.ILLLGLDNAGK.T	sp|Q52NJ4|ARL3_PIG	1125.68
0.9378	marcv_X1510_191.16021.16021.2	K.EDPLLTPVPASENPFREK.K	tr|I3LJ42|I3LJ42_PIG	2038.04
0.9967	marcv_X1510_191.16037.16037.2	R.VPLSPLSLPAGPADAR.R	tr|I3L7H8|I3L7H8_PIG,tr|F1SFW7|F1SFW7_PIG	1559.87
0.9324	marcv_X1510_191.16051.16051.2	R.VSFELFADK.V	sp|P62936|PPIA_PIG	1054.53
0.9391	marcv_X1510_191.16065.16065.2	K.FLANVSTVLTSK.Y	sp|P01965|HBA_PIG,tr|K7GLP2|K7GLP2_PIG,tr|K7GQP8|K7GQP8_PIG,tr|K7GM56|K7GM56_PIG,tr|F1RGX4|F1RGX4_PIG	1278.72
1	marcv_X1510_191.16066.16066.2	K.GLVYETSVLDPDEGIR.F	sp|P00889|CISY_PIG,tr|I3L6H2|I3L6H2_PIG	1761.88
0.9979	marcv_X1510_191.16069.16069.2	R.LALFNPDVC[160.03]WDRK.N	tr|A1XQS3|A1XQS3_PIG	1632.81
0.9972	marcv_X1510_191.16072.16072.2	K.LAVNMVPFPR.L	sp|Q767L7|TBB5_PIG,sp|P02554|TBB_PIG,tr|A5GFX6|A5GFX6_PIG,tr|F2Z5K5|F2Z5K5_PIG,tr|F1S6M7|F1S6M7_PIG,tr|F2Z5B2|F2Z5B2_PIG,tr|I3LBV1|I3LBV1_PIG,tr|F2Z571|F2Z571_PIG	1142.63
0.9678	marcv_X1510_191.16103.16103.4	M.PIPPPPPPPPGPPPPPTFNQANTELPK.L	tr|F1RXC5|F1RXC5_PIG	2790.47
0.999	marcv_X1510_191.16112.16112.3	K.EDPLLTPVPASENPFREK.K	tr|I3LJ42|I3LJ42_PIG	2038.04
0.9424	marcv_X1510_191.16119.16119.3	M.PIPPPPPPPPGPPPPPTFNQANTELPK.L	tr|F1RXC5|F1RXC5_PIG	2790.47
0.9998	marcv_X1510_191.16140.16140.3	K.RAGTLSPQPLLTPQDPSALSFR.R	tr|F1SCH7|F1SCH7_PIG	2351.26
1	marcv_X1510_191.16158.16158.3	K.NPAC[160.03]QEPFLSC[160.03]C[160.03]QFAEALRK.K	tr|F1RQW2|F1RQW2_PIG	2425.1
0.9975	marcv_X1510_191.16168.16168.3	K.RSIQFVDWC[160.03]PTGFK.V	sp|Q2XVP4|TBA1B_PIG,tr|F2Z5S8|F2Z5S8_PIG,tr|F1SHC1|F1SHC1_PIG,tr|F1SR80|F1SR80_PIG	1739.85
0.9975	marcv_X1510_191.16169.16169.2	K.LALDVEIATYR.K	tr|F1SGG2|F1SGG2_PIG,tr|F1SGG7|F1SGG7_PIG,tr|I3LLY8|I3LLY8_PIG,tr|F1SGG4|F1SGG4_PIG,tr|F1SGI7|F1SGI7_PIG,tr|F1SGG3|F1SGG3_PIG,tr|F1SGG6|F1SGG6_PIG,tr|I3LDM6|I3LDM6_PIG,tr|F1SGG9|F1SGG9_PIG	1262.69
0.9854	marcv_X1510_191.16176.16176.2	R.IITGPAPVLPPAALR.T	sp|Q5W9D5|QKI_PIG,tr|F1SBW4|F1SBW4_PIG	1484.91
0.98	marcv_X1510_191.16185.16185.2	R.GVGAEPLLPWNR.M	tr|F1SAU5|F1SAU5_PIG	1307.7
1	marcv_X1510_191.16192.16192.2	R.TPTPAGPTIMPLIR.Q	sp|Q5W9D5|QKI_PIG,tr|F1SBW4|F1SBW4_PIG	1463.82
1	marcv_X1510_191.16200.16200.3	K.AAADLM[147.04]AYC[160.03]EAHAKEDPLLTPVPASENPFR.E	tr|I3LJ42|I3LJ42_PIG	3299.56
0.9971	marcv_X1510_191.16205.16205.2	K.SQTPLVTLFK.N	sp|P01192|COLI_PIG,tr|A8VWB5|A8VWB5_PIG	1132.65
0.9974	marcv_X1510_191.16222.16222.2	R.DVLSSLPMKPC[160.03]PEAIK.E	sp|Q8WMQ3|CD9_PIG,tr|F1SL24|F1SL24_PIG,tr|K7GMI9|K7GMI9_PIG,tr|I3LPR3|I3LPR3_PIG	1783.92
0.9838	marcv_X1510_191.16231.16231.2	R.LYSLLFR.R	tr|Q2EN79|Q2EN79_PIG	910.528
0.9959	marcv_X1510_191.16234.16234.2	K.ISMPDVDLNLK.G	tr|I3L5D5|I3L5D5_PIG,tr|I3L5D5|I3L5D5_PIG	1243.65
0.9925	marcv_X1510_191.16238.16238.2	R.VMVSALPGFQPVGPK.D	tr|F1SCH7|F1SCH7_PIG	1525.83
0.9368	marcv_X1510_191.16246.16246.3	K.LM[147.04]C[160.03]PQEIVDYIADKK.D	tr|F1SAB6|F1SAB6_PIG	1837.9
0.9971	marcv_X1510_191.16272.16272.2	R.IINEPTAAAIAYGLDK.A	sp|A5A8V7|HS71L_PIG,tr|F1RS36|F1RS36_PIG,tr|F1SA70|F1SA70_PIG	1658.89
0.9904	marcv_X1510_191.16293.16293.2	R.ALLQQLPLPR.R	sp|P06296|CRF_PIG	1147.71
0.9958	marcv_X1510_191.16307.16307.2	K.GLTPSQIGVILR.D	sp|P62279|RS13_PIG,tr|F6Q5P0|F6Q5P0_PIG	1252.75
1	marcv_X1510_191.16311.16311.3	K.AGQTQPNPGILPIQPALTPR.K	sp|F1SPM8|AAK1_PIG,tr|I3L548|I3L548_PIG	2068.14
1	marcv_X1510_191.16319.16319.2	K.AGQTQPNPGILPIQPALTPR.K	sp|F1SPM8|AAK1_PIG,tr|I3L548|I3L548_PIG	2068.14
1	marcv_X1510_191.16323.16323.2	K.DFLAGGVAAAISK.T	tr|F2Z565|F2Z565_PIG,tr|F1RZQ6|F1RZQ6_PIG	1218.66
0.9687	marcv_X1510_191.16326.16326.2	R.DSFPNFLAC[160.03]K.H	tr|F1SCH1|F1SCH1_PIG	1197.55
0.9959	marcv_X1510_191.16358.16358.2	K.GDGPVQGTIYFELK.G	sp|P04178|SODC_PIG	1522.77
1	marcv_X1510_191.16367.16367.2	K.IEVGLVVGNSQVAFEK.A	tr|F1RRS3|F1RRS3_PIG,tr|I3LTE8|I3LTE8_PIG	1687.91
0.9903	marcv_X1510_191.16392.16392.2	K.DLPPFGINSPQALK.K	tr|F1RTX9|F1RTX9_PIG	1495.8
1	marcv_X1510_191.16420.16420.3	K.AAADLMAYC[160.03]EAHAKEDPLLTPVPASENPFREK.K	tr|I3LJ42|I3LJ42_PIG	3540.7
0.9826	marcv_X1510_191.16423.16423.2	K.ELGSLPLPLSTSEQR.Q	tr|I3LHT9|I3LHT9_PIG	1625.86
1	marcv_X1510_191.16440.16440.3	R.LLQGRPPLDFYPPGVHPSGLVPR.E	tr|F1RTF0|F1RTF0_PIG	2511.38
0.9974	marcv_X1510_191.16441.16441.2	R.LFDQAFGLPR.L	sp|Q5S1U1|HSPB1_PIG	1162.61
1	marcv_X1510_191.16444.16444.2	K.IITHPNFNGNTLDNDIM[147.04]LIK.L	sp|P00761|TRYP_PIG,tr|F1SRS2|F1SRS2_PIG	2298.17
1	marcv_X1510_191.16445.16445.2	K.SAGPQSQLLASVIAEK.S	tr|I3L5B0|I3L5B0_PIG	1597.87
1	marcv_X1510_191.16452.16452.3	K.IITHPNFNGNTLDNDIM[147.04]LIK.L	sp|P00761|TRYP_PIG,tr|F1SRS2|F1SRS2_PIG	2298.17
0.9851	marcv_X1510_191.16467.16467.2	R.VLPSITTEILK.S	tr|F2Z543|F2Z543_PIG,tr|F1RWF5|F1RWF5_PIG	1212.73
0.9373	marcv_X1510_191.16468.16468.3	K.FSMPGFKGEGPEVDVNLPK.A	tr|I3L5D5|I3L5D5_PIG,tr|I3L5D5|I3L5D5_PIG,tr|I3L5D5|I3L5D5_PIG	2047.01
0.9547	marcv_X1510_191.16482.16482.2	R.GILLFGPPGTGK.S	tr|F1SMW4|F1SMW4_PIG,tr|I3LS61|I3LS61_PIG,tr|I3LL27|I3LL27_PIG	1155.67
0.9919	marcv_X1510_191.16515.16515.2	K.VSMPDIDLNLK.G	tr|I3L5D5|I3L5D5_PIG	1243.65
0.9829	marcv_X1510_191.16519.16519.4	K.AVGHLDDLPGALSALSDLHAHK.L	sp|P01965|HBA_PIG,tr|K7GLP2|K7GLP2_PIG,tr|K7GQP8|K7GQP8_PIG,tr|K7GM56|K7GM56_PIG,tr|F1RGX4|F1RGX4_PIG	2236.16
1	marcv_X1510_191.16529.16529.5	K.AVGHLDDLPGALSALSDLHAHK.L	sp|P01965|HBA_PIG,tr|K7GLP2|K7GLP2_PIG,tr|K7GQP8|K7GQP8_PIG,tr|K7GM56|K7GM56_PIG,tr|F1RGX4|F1RGX4_PIG	2236.16
1	marcv_X1510_191.16530.16530.3	K.AVGHLDDLPGALSALSDLHAHK.L	sp|P01965|HBA_PIG,tr|K7GLP2|K7GLP2_PIG,tr|K7GQP8|K7GQP8_PIG,tr|K7GM56|K7GM56_PIG,tr|F1RGX4|F1RGX4_PIG	2236.16
0.9997	marcv_X1510_191.16533.16533.3	K.GRELPTAFDYVEFTR.S	tr|F1RR78|F1RR78_PIG	1799.88
0.9978	marcv_X1510_191.16543.16543.2	R.DFTPSGIAGAFQR.G	sp|Q95339|ATPK_PIG,tr|F1REX4|F1REX4_PIG	1365.67
0.9907	marcv_X1510_191.16546.16546.2	K.ILDVLGQIPK.N	tr|F1SLY2|F1SLY2_PIG	1094.67
1	marcv_X1510_191.16557.16557.3	R.SPSWDPFRDWYPAHSR.L	sp|Q5S1U1|HSPB1_PIG	2002.91
0.9914	marcv_X1510_191.16577.16577.2	K.VENIPAVVIEIK.K	tr|I3LU77|I3LU77_PIG	1322.78
1	marcv_X1510_191.16585.16585.2	K.LGEYGFQNALIVR.Y	sp|P08835|ALBU_PIG,tr|F1RUN2|F1RUN2_PIG	1478.79
0.9993	marcv_X1510_191.16624.16624.3	R.LHFFM[147.04]PGFAPLTSR.G	sp|Q767L7|TBB5_PIG,sp|P02554|TBB_PIG,tr|F2Z5K5|F2Z5K5_PIG,tr|F2Z5B2|F2Z5B2_PIG,tr|F2Z571|F2Z571_PIG	1635.82
0.9961	marcv_X1510_191.16634.16634.2	K.FLDPITGTFR.Y	tr|F1RYL9|F1RYL9_PIG	1165.61
1	marcv_X1510_191.16635.16635.2	R.LHFFM[147.04]PGFAPLTSR.G	sp|Q767L7|TBB5_PIG,sp|P02554|TBB_PIG,tr|F2Z5K5|F2Z5K5_PIG,tr|F2Z5B2|F2Z5B2_PIG,tr|F2Z571|F2Z571_PIG	1635.82
0.9686	marcv_X1510_191.16640.16640.2	R.NLSDIDLM[147.04]APQPGV.-	tr|F1RUW3|F1RUW3_PIG	1484.72
1	marcv_X1510_191.16642.16642.2	R.AILVDLEPGTMDSVR.S	sp|Q767L7|TBB5_PIG,sp|P02554|TBB_PIG,tr|F1S6M7|F1S6M7_PIG,tr|F2Z5B2|F2Z5B2_PIG	1614.83
0.9907	marcv_X1510_191.16658.16658.5	K.AAADLMAYC[160.03]EAHAKEDPLLTPVPASENPFREK.K	tr|I3LJ42|I3LJ42_PIG	3540.7
0.916	marcv_X1510_191.16683.16683.4	K.AAADLM[147.04]AYC[160.03]EAHAKEDPLLTPVPASENPFR.E	tr|I3LJ42|I3LJ42_PIG	3299.56
0.9223	marcv_X1510_191.16686.16686.3	K.IITHPNFNGNTLDNDIMLIK.L	sp|P00761|TRYP_PIG,tr|F1SRS2|F1SRS2_PIG	2282.17
0.926	marcv_X1510_191.16735.16735.2	K.LTLSALIDGK.N	sp|Q29380|VDAC3_PIG,sp|Q9MZ16|VDAC1_PIG,tr|I3LM14|I3LM14_PIG,tr|F1SE26|F1SE26_PIG,tr|F1SE27|F1SE27_PIG	1029.61
1	marcv_X1510_191.16766.16766.2	K.LENLLLLDLQHNK.L	tr|F1S6B4|F1S6B4_PIG	1561.88
0.9396	marcv_X1510_191.16770.16770.2	K.DLVPSLKPGTQVIVLSTR.L	tr|I3LLV8|I3LLV8_PIG	1922.12
0.986	marcv_X1510_191.16788.16788.3	K.IAPPLSPHPLTPTLVSLPR.E	tr|F1RG90|F1RG90_PIG	2005.17
0.9972	marcv_X1510_191.16808.16808.2	K.GMNTLVGYDLVPEPK.L	tr|F1SJ34|F1SJ34_PIG	1631.82
0.995	marcv_X1510_191.16821.16821.2	K.SPISVPGGSALISNLGK.V	tr|K7GSX0|K7GSX0_PIG,tr|F1RZU3|F1RZU3_PIG	1595.89
0.9894	marcv_X1510_191.16822.16822.2	K.RIDSLM[147.04]DEIAFLK.K	sp|P02547|NFL_PIG,tr|F1RJU4|F1RJU4_PIG	1565.81
0.9999	marcv_X1510_191.16842.16842.3	R.LHFFM[147.04]PGFAPLTAR.G	tr|F1S6M7|F1S6M7_PIG,tr|I3LBV1|I3LBV1_PIG	1619.83
1	marcv_X1510_191.16845.16845.2	K.GPVREGDVLTLLESER.E	sp|Q6QAT1|RS28_PIG	1768.93
0.9912	marcv_X1510_191.16856.16856.3	K.DALLVGIPTGSNPFREPR.S	tr|F1SNC2|F1SNC2_PIG	1938.03
1	marcv_X1510_191.16857.16857.2	R.LHFFM[147.04]PGFAPLTAR.G	tr|F1S6M7|F1S6M7_PIG,tr|I3LBV1|I3LBV1_PIG	1619.83
0.9696	marcv_X1510_191.16859.16859.2	K.DALLVGIPTGSNPFREPR.S	tr|F1SNC2|F1SNC2_PIG	1938.03
0.999	marcv_X1510_191.16861.16861.3	K.ILPGGAAEQAGKLTEAVSAFGK.K	tr|F1SPS8|F1SPS8_PIG	2114.14
0.9689	marcv_X1510_191.16876.16876.3	K.TVC[160.03]TYWEDFHSC[160.03]TVTALTDC[160.03]QEGAK.D	tr|F1RW81|F1RW81_PIG	2978.25
0.9861	marcv_X1510_191.16882.16882.4	R.GVAGALRPLVQAALPATSESPVLDAKR.S	tr|F1RNZ1|F1RNZ1_PIG	2686.51
1	marcv_X1510_191.16887.16887.3	R.GVAGALRPLVQAALPATSESPVLDAKR.S	tr|F1RNZ1|F1RNZ1_PIG	2686.51
1	marcv_X1510_191.16947.16947.2	K.SLNNQFASFIDKVR.F	tr|F1SGG3|F1SGG3_PIG	1637.85
1	marcv_X1510_191.16966.16966.2	K.NIGWGTDQGIGGFGEEPGIK.S	tr|F1RZY2|F1RZY2_PIG	2030.97
0.9586	marcv_X1510_191.16985.16985.2	K.EQGVLSFWR.G	sp|Q6QRN9|ADT3_PIG,tr|F2Z565|F2Z565_PIG,tr|I3LDJ6|I3LDJ6_PIG	1120.57
0.9487	marcv_X1510_191.16996.16996.3	K.TVPPRPSMPAPPPPTPPPPPPPLPPPLPPSSPIK.A	tr|F1SIG6|F1SIG6_PIG	3443.9
0.9976	marcv_X1510_191.17012.17012.2	K.ADIAVPLVFTK.Y	tr|F1SUM1|F1SUM1_PIG	1172.68
1	marcv_X1510_191.17013.17013.2	K.SPSAQLLEQVTQLK.S	tr|F1SNT8|F1SNT8_PIG	1540.85
1	marcv_X1510_191.17016.17016.2	K.SAHEIILDFIR.S	tr|I3LMK8|I3LMK8_PIG	1312.71
1	marcv_X1510_191.17027.17027.3	R.TPAALAALSLAGSGTPPTTANYPSSSR.T	tr|I3LCW3|I3LCW3_PIG	2558.3
0.9157	marcv_X1510_191.17030.17030.3	K.ERLM[147.04]NDFSAALNSFQAVQR.R	tr|I3LHT9|I3LHT9_PIG	2212.07
0.989	marcv_X1510_191.17063.17063.3	K.IITHPNFNGNTLDNDIM[147.04]LIK.L	sp|P00761|TRYP_PIG,tr|F1SRS2|F1SRS2_PIG	2298.17
0.9999	marcv_X1510_191.17076.17076.3	K.IITHPNFNGNTLDNDIMLIK.L	sp|P00761|TRYP_PIG,tr|F1SRS2|F1SRS2_PIG	2282.17
0.9975	marcv_X1510_191.17083.17083.3	K.SLC[160.03]IPFKPLC[160.03]ELQPAAK.C	tr|F1S9K5|F1S9K5_PIG	1971.03
1	marcv_X1510_191.17087.17087.2	K.IITHPNFNGNTLDNDIMLIK.L	sp|P00761|TRYP_PIG,tr|F1SRS2|F1SRS2_PIG	2282.17
0.9999	marcv_X1510_191.17088.17088.3	K.EDPLLTPVPASENPFR.E	tr|I3LJ42|I3LJ42_PIG	1780.9
1	marcv_X1510_191.17104.17104.2	R.AAVQTTC[160.03]DLMSLVTK.A	tr|I3L8R9|I3L8R9_PIG,tr|F1RPM0|F1RPM0_PIG	1636.82
1	marcv_X1510_191.17129.17129.2	K.VSILAAIDEASK.K	sp|P18648|APOA1_PIG,tr|A0A0C3SG01|A0A0C3SG01_PIG	1215.67
0.9879	marcv_X1510_191.17133.17133.2	K.YLPGPLQDIFKK.-	tr|I3LND3|I3LND3_PIG	1417.8
0.9958	marcv_X1510_191.17135.17135.2	K.ALPLIVGAQLIHADK.L	tr|F1SU06|F1SU06_PIG	1557.92
0.9958	marcv_X1510_191.17142.17142.2	R.LLVVYPWTQR.F	sp|P02067|HBB_PIG,sp|P02101|HBE_PIG,sp|P04246|HBT_PIG,tr|F1RII7|F1RII7_PIG,tr|F1RII5|F1RII5_PIG,tr|F1RII6|F1RII6_PIG	1273.72
0.9927	marcv_X1510_191.17154.17154.2	R.AWDDFFPGSDR.F	sp|Q56P28|PRAF3_PIG	1311.55
0.9934	marcv_X1510_191.17166.17166.2	R.GPDFTPAFADFGR.Q	tr|I3LEV1|I3LEV1_PIG	1396.64
1	marcv_X1510_191.17177.17177.2	K.EDPLLTPVPASENPFR.E	tr|I3LJ42|I3LJ42_PIG	1780.9
0.927	marcv_X1510_191.17196.17196.2	K.TLNPVFNEQFTFK.V	tr|F1RYK1|F1RYK1_PIG	1583.8
0.9323	marcv_X1510_191.17299.17299.2	R.ALYDFEPENEGELGFK.E	tr|F1SNE5|F1SNE5_PIG	1856.85
1	marcv_X1510_191.17332.17332.2	K.TIGGGDDSFNTFFSETGAGK.H	sp|P02550|TBA1A_PIG,sp|Q2XVP4|TBA1B_PIG,tr|F1RK98|F1RK98_PIG,tr|F1SHC1|F1SHC1_PIG,tr|F1SR80|F1SR80_PIG,tr|F2Z5T5|F2Z5T5_PIG	2006.89
0.9999	marcv_X1510_191.17357.17357.3	K.EDPLLTPVPASENPFR.E	tr|I3LJ42|I3LJ42_PIG	1780.9
1	marcv_X1510_191.17386.17386.3	K.GPALLPEPLKPQAALPVQPSLPPAVQK.M	tr|F1SHM3|F1SHM3_PIG	2755.6
0.9928	marcv_X1510_191.17387.17387.4	K.GPALLPEPLKPQAALPVQPSLPPAVQK.M	tr|F1SHM3|F1SHM3_PIG	2755.6
0.9999	marcv_X1510_191.17392.17392.3	K.LNLAGVHLPGVLQPGC[160.03]VSAR.A	tr|F1SHE5|F1SHE5_PIG	2057.12
0.9876	marcv_X1510_191.17397.17397.2	K.LLGPDAAINLTDPDGALAK.R	tr|I3LN31|I3LN31_PIG,tr|F1SL58|F1SL58_PIG,tr|I3LNF5|I3LNF5_PIG,tr|F1SKF9|F1SKF9_PIG	1863.99
0.9992	marcv_X1510_191.17402.17402.3	K.KPPAKDPLADLNIKDFL.-	tr|F1RQM6|F1RQM6_PIG	1894.06
1	marcv_X1510_191.17404.17404.2	K.GPALLPEPLKPQAALPVQPSLPPAVQK.M	tr|F1SHM3|F1SHM3_PIG	2755.6
0.9895	marcv_X1510_191.17407.17407.3	R.NDPLLVGVPASENPFK.D	tr|I3LKQ1|I3LKQ1_PIG	1695.88
1	marcv_X1510_191.17412.17412.2	K.LALDIEIATYR.K	tr|F1RR02|F1RR02_PIG,tr|I3LQN8|I3LQN8_PIG,tr|F1SGI2|F1SGI2_PIG,tr|I3LK01|I3LK01_PIG	1276.7
0.998	marcv_X1510_191.17425.17425.2	K.QFLIC[160.03]SIC[160.03]LER.Y	tr|I3L8U3|I3L8U3_PIG	1437.71
1	marcv_X1510_191.17430.17430.2	K.GVLFGVPGAFTPGC[160.03]SK.T	tr|F1RQP0|F1RQP0_PIG	1592.8
0.995	marcv_X1510_191.17448.17448.2	K.EDPLLTPVPASENPFR.E	tr|I3LJ42|I3LJ42_PIG	1780.9
1	marcv_X1510_191.17456.17456.3	K.AAADLMAYC[160.03]EAHAKEDPLLTPVPASENPFR.E	tr|I3LJ42|I3LJ42_PIG	3283.56
0.9982	marcv_X1510_191.17477.17477.3	R.ASSSAPVASPAAPSPGSSGGGGFFSSLSNAVK.Q	tr|B7TY10|B7TY10_PIG,tr|B7TY11|B7TY11_PIG	2835.37
1	marcv_X1510_191.17522.17522.2	R.NDPLLVGVPASENPFK.D	tr|I3LKQ1|I3LKQ1_PIG	1695.88
0.9909	marcv_X1510_191.17529.17529.4	K.SPAAPLSPASSPLTGSSGNRPDEVAANFFR.A	sp|P06296|CRF_PIG	2999.47
0.9895	marcv_X1510_191.17556.17556.3	K.KDEWGLVAPISPGPLTPMK.E	tr|F1SSS6|F1SSS6_PIG	2035.08
0.9862	marcv_X1510_191.17589.17589.2	K.FFQPTEM[147.04]AAQDFFQR.W	tr|I3LK24|I3LK24_PIG,tr|F1RH60|F1RH60_PIG	1877.84
0.9542	marcv_X1510_191.17616.17616.3	K.IITHPNFNGNTLDNDIMLIK.L	sp|P00761|TRYP_PIG,tr|F1SRS2|F1SRS2_PIG	2282.17
0.9381	marcv_X1510_191.17645.17645.4	K.AAADLMAYC[160.03]EAHAKEDPLLTPVPASENPFR.E	tr|I3LJ42|I3LJ42_PIG	3283.56
0.9999	marcv_X1510_191.17658.17658.3	K.GPALLPEPLKPQAALPVQPSLPPAVQK.M	tr|F1SHM3|F1SHM3_PIG	2755.6
0.9857	marcv_X1510_191.17659.17659.4	K.GPALLPEPLKPQAALPVQPSLPPAVQK.M	tr|F1SHM3|F1SHM3_PIG	2755.6
1	marcv_X1510_191.17661.17661.3	K.VIHDHFGIVEGLM[147.04]TTVHAITATQK.T	sp|P00355|G3P_PIG	2633.36
1	marcv_X1510_191.17678.17678.2	K.EQVTNVGEAVVTGVTAVAQK.T	sp|Q3I5G7|SYUA_PIG	1999.06
1	marcv_X1510_191.17708.17708.2	K.EDPLLTPVPASENPFR.E	tr|I3LJ42|I3LJ42_PIG	1780.9
0.99	marcv_X1510_191.17714.17714.3	K.EQVTNVGEAVVTGVTAVAQK.T	sp|Q3I5G7|SYUA_PIG	1999.06
0.9977	marcv_X1510_191.17721.17721.2	K.GPALLPEPLKPQAALPVQPSLPPAVQK.M	tr|F1SHM3|F1SHM3_PIG	2755.6
1	marcv_X1510_191.17724.17724.3	K.AAADLMAYC[160.03]EAHAKEDPLLTPVPASENPFR.E	tr|I3LJ42|I3LJ42_PIG	3283.56
1	marcv_X1510_191.17778.17778.2	R.NDPLLVGVPASENPFK.D	tr|I3LKQ1|I3LKQ1_PIG	1695.88
1	marcv_X1510_191.17823.17823.2	K.TVTAMDVVYALK.R	sp|P62802|H4_PIG	1309.7
1	marcv_X1510_191.17830.17830.2	K.VIHDHFGIVEGLM[147.04]TTVHAITATQK.T	sp|P00355|G3P_PIG	2633.36
0.9978	marcv_X1510_191.17835.17835.2	R.TGAIVDVPVGEELLGR.V	sp|P80021|ATPA_PIG,tr|F1RPS8|F1RPS8_PIG	1623.88
0.9999	marcv_X1510_191.17869.17869.3	K.RTPM[147.04]GIVLDALEQQEENISK.F	sp|Q56P28|PRAF3_PIG	2286.15
0.9975	marcv_X1510_191.17879.17879.2	K.EAFQNAYLELGGLGER.V	tr|F1RGF9|F1RGF9_PIG	1765.86
0.9852	marcv_X1510_191.17896.17896.4	K.VIHDHFGIVEGLM[147.04]TTVHAITATQK.T	sp|P00355|G3P_PIG	2633.36
1	marcv_X1510_191.17897.17897.2	R.GLPLVDDGGWNTVPISK.G	tr|I3LMH4|I3LMH4_PIG	1766.92
0.9998	marcv_X1510_191.17909.17909.3	K.GPALLPEPLKPQAALPVQPSLPPAVQK.M	tr|F1SHM3|F1SHM3_PIG	2755.6
1	marcv_X1510_191.17911.17911.3	K.VIHDHFGIVEGLM[147.04]TTVHAITATQK.T	sp|P00355|G3P_PIG	2633.36
1	marcv_X1510_191.17927.17927.2	R.EGDVLTLLESER.E	sp|Q6QAT1|RS28_PIG	1359.69
1	marcv_X1510_191.17929.17929.2	K.NPAC[160.03]QEPFLSC[160.03]C[160.03]QFAEALR.K	tr|F1RQW2|F1RQW2_PIG	2297
0.9868	marcv_X1510_191.17951.17951.2	R.SLGEEPVGGLGGLLDPAK.K	tr|I3LCT5|I3LCT5_PIG	1707.9
0.9871	marcv_X1510_191.17952.17952.3	K.IITHPNFNGNTLDNDIMLIK.L	sp|P00761|TRYP_PIG,tr|F1SRS2|F1SRS2_PIG	2282.17
0.978	marcv_X1510_191.17962.17962.2	K.EDPLLTPVPASENPFR.E	tr|I3LJ42|I3LJ42_PIG	1780.9
1	marcv_X1510_191.17969.17969.2	K.GM[147.04]SLNLEPDNVGVVVFGNDK.L	sp|P80021|ATPA_PIG,tr|F1RPS8|F1RPS8_PIG	2119.03
0.9997	marcv_X1510_191.18008.18008.3	K.TIC[160.03]PLC[160.03]NTTELLLHVPEK.A	tr|F1SBX0|F1SBX0_PIG,tr|I3LNF0|I3LNF0_PIG,tr|I3LFI1|I3LFI1_PIG	2137.09
1	marcv_X1510_191.18021.18021.3	R.GVAGALRPLVQAALPATSESPVLDAK.R	tr|F1RNZ1|F1RNZ1_PIG	2530.41
0.9953	marcv_X1510_191.18034.18034.2	K.IFGVTTLDIVR.A	sp|P00346|MDHM_PIG,tr|I3LP41|I3LP41_PIG,tr|I3LB44|I3LB44_PIG	1232.71
1	marcv_X1510_191.18052.18052.2	R.NDPLLVGVPASENPFK.D	tr|I3LKQ1|I3LKQ1_PIG	1695.88
0.9402	marcv_X1510_191.18053.18053.4	R.GVAGALRPLVQAALPATSESPVLDAK.R	tr|F1RNZ1|F1RNZ1_PIG	2530.41
0.9987	marcv_X1510_191.18066.18066.3	K.LWLEQPENIPTC[160.03]IALRPYPK.E	tr|F1SDL0|F1SDL0_PIG	2437.28
0.9967	marcv_X1510_191.18079.18079.2	K.DFLAGGIAAAISK.T	sp|Q6QRN9|ADT3_PIG	1232.68
1	marcv_X1510_191.18104.18104.2	R.GVAGALRPLVQAALPATSESPVLDAK.R	tr|F1RNZ1|F1RNZ1_PIG	2530.41
0.9978	marcv_X1510_191.18105.18105.2	R.EIFGMSIQEFDK.L	tr|F1S4V5|F1S4V5_PIG	1442.68
1	marcv_X1510_191.18115.18115.3	R.LTLYDIAHTPGVAADLSHIETR.A	sp|P00346|MDHM_PIG,tr|I3LP41|I3LP41_PIG,tr|I3LB44|I3LB44_PIG	2392.24
0.9992	marcv_X1510_191.18117.18117.3	K.VLAATAPTPGIPILQSVPSAPPPK.A	tr|F1RGJ6|F1RGJ6_PIG	2321.34
0.9995	marcv_X1510_191.18119.18119.3	K.LITINQEWKPIEELQNVR.R	tr|F1SN46|F1SN46_PIG	2222.21
0.9951	marcv_X1510_191.18158.18158.2	K.IFPYEMLM[147.04]VTNR.G	tr|F1S4V5|F1S4V5_PIG	1528.74
0.9999	marcv_X1510_191.18167.18167.3	K.GPALLPEPLKPQAALPVQPSLPPAVQK.M	tr|F1SHM3|F1SHM3_PIG	2755.6
0.9588	marcv_X1510_191.18168.18168.4	K.GPALLPEPLKPQAALPVQPSLPPAVQK.M	tr|F1SHM3|F1SHM3_PIG	2755.6
0.9538	marcv_X1510_191.18204.18204.2	K.EYLPIGGLAEFC[160.03]K.A	sp|P00506|AATM_PIG	1495.74
1	marcv_X1510_191.18224.18224.2	K.AM[147.04]GIM[147.04]NSFVNDIFER.L	tr|F2Z584|F2Z584_PIG,tr|F2Z580|F2Z580_PIG,tr|F2Z5L0|F2Z5L0_PIG,tr|I3LE39|I3LE39_PIG,tr|F2Z579|F2Z579_PIG,tr|F2Z581|F2Z581_PIG,tr|I3LEB6|I3LEB6_PIG,tr|I3LAQ1|I3LAQ1_PIG,tr|I3LL41|I3LL41_PIG,tr|F2Z578|F2Z578_PIG	1774.8
1	marcv_X1510_191.18232.18232.2	R.LALFNPDVC[160.03]WDR.K	tr|A1XQS3|A1XQS3_PIG	1504.71
1	marcv_X1510_191.18238.18238.2	K.SVISGGLDALEFIGKK.T	tr|F1RQC1|F1RQC1_PIG,tr|I3L703|I3L703_PIG	1632.91
1	marcv_X1510_191.18262.18262.2	R.ETLGQIWALANR.T	tr|I3LBS8|I3LBS8_PIG	1370.73
1	marcv_X1510_191.18297.18297.3	R.GVAGALRPLVQAALPATSESPVLDAK.R	tr|F1RNZ1|F1RNZ1_PIG	2530.41
0.98	marcv_X1510_191.18323.18323.4	R.GVAGALRPLVQAALPATSESPVLDAK.R	tr|F1RNZ1|F1RNZ1_PIG	2530.41
0.9934	marcv_X1510_191.18410.18410.2	K.DSNLYQLPSSLLR.R	sp|P67934|TKNK_PIG,tr|F1SL77|F1SL77_PIG	1504.79
1	marcv_X1510_191.18431.18431.2	R.NDPLLVGVPASENPFK.D	tr|I3LKQ1|I3LKQ1_PIG	1695.88
1	marcv_X1510_191.18476.18476.2	K.VFLLGEEVAQYDGAYK.V	tr|F1SGH5|F1SGH5_PIG	1800.89
0.9998	marcv_X1510_191.18490.18490.3	K.GHVDILAPTVQELAALEK.E	tr|I3LGP0|I3LGP0_PIG	1903.04
1	marcv_X1510_191.18497.18497.2	K.GHVDILAPTVQELAALEK.E	tr|I3LGP0|I3LGP0_PIG	1903.04
1	marcv_X1510_191.18542.18542.2	R.NLSDIDLMAPQPGV.-	tr|F1RUW3|F1RUW3_PIG	1468.72
1	marcv_X1510_191.18552.18552.3	R.GVAGALRPLVQAALPATSESPVLDAK.R	tr|F1RNZ1|F1RNZ1_PIG	2530.41
1	marcv_X1510_191.18559.18559.2	R.AIAELGIYPAVDPLDSTSR.L	tr|F1SLA0|F1SLA0_PIG,tr|K7GLT8|K7GLT8_PIG	1987.03
0.9998	marcv_X1510_191.18582.18582.3	R.AIAELGIYPAVDPLDSTSR.L	tr|F1SLA0|F1SLA0_PIG,tr|K7GLT8|K7GLT8_PIG	1987.03
0.9992	marcv_X1510_191.18586.18586.3	K.INEVLTAAVTQASLQSIIHK.F	tr|F1SE54|F1SE54_PIG,tr|I3LEF7|I3LEF7_PIG	2135.2
0.9981	marcv_X1510_191.18592.18592.3	K.AAELIANSLATAGDGLIELRK.L	tr|F2Z543|F2Z543_PIG	2125.17
1	marcv_X1510_191.18625.18625.3	K.GHYTEGAELVDSVLDVVRK.E	sp|Q767L7|TBB5_PIG,sp|P02554|TBB_PIG,tr|F1S6M7|F1S6M7_PIG,tr|F2Z5B2|F2Z5B2_PIG,tr|F2Z571|F2Z571_PIG	2086.07
0.9978	marcv_X1510_191.18636.18636.2	K.DALLVGIPTGSNPFR.E	tr|F1SNC2|F1SNC2_PIG	1555.84
0.9966	marcv_X1510_191.18652.18652.2	K.LIHIPINNIIVGG.-	tr|F2Z5D9|F2Z5D9_PIG	1371.82
0.9857	marcv_X1510_191.18721.18721.3	K.STSESFIQHIVSLVHHVK.E	tr|F1S684|F1S684_PIG	2047.09
0.9991	marcv_X1510_191.18723.18723.3	K.ERLMNDFSAALNSFQAVQR.R	tr|I3LHT9|I3LHT9_PIG	2196.07
0.9303	marcv_X1510_191.18732.18732.2	K.EDPLLTPVPASENPFR.E	tr|I3LJ42|I3LJ42_PIG	1780.9
0.999	marcv_X1510_191.18771.18771.3	R.QLM[147.04]SQGLSWHDDLTQYVISQEMER.L	tr|F1SR78|F1SR78_PIG	2909.33
0.9554	marcv_X1510_191.18800.18800.2	R.ELPTAFDYVEFTR.S	tr|F1RR78|F1RR78_PIG	1586.76
0.9578	marcv_X1510_191.18807.18807.2	K.LGELPSWILM[147.04]R.D	sp|Q95339|ATPK_PIG,tr|F1REX4|F1REX4_PIG	1329.71
1	marcv_X1510_191.18810.18810.2	K.DSPLLLQQISAMR.L	tr|F1SNT8|F1SNT8_PIG	1470.79
1	marcv_X1510_191.18827.18827.2	R.LLALALAESAQQASTQSLK.R	tr|F1S6F6|F1S6F6_PIG	1942.07
0.9974	marcv_X1510_191.18847.18847.2	R.AVFVDLEPTVIDEVR.T	sp|P02550|TBA1A_PIG,sp|Q2XVP4|TBA1B_PIG,tr|F1SHC1|F1SHC1_PIG,tr|F1SR80|F1SR80_PIG,tr|F2Z5T5|F2Z5T5_PIG	1700.9
0.941	marcv_X1510_191.18855.18855.3	R.LLALALAESAQQASTQSLK.R	tr|F1S6F6|F1S6F6_PIG	1942.07
1	marcv_X1510_191.18858.18858.2	R.LHFFMPGFAPLTSR.G	sp|Q767L7|TBB5_PIG,sp|P02554|TBB_PIG,tr|F2Z5K5|F2Z5K5_PIG,tr|F2Z5B2|F2Z5B2_PIG,tr|F2Z571|F2Z571_PIG	1619.83
0.9993	marcv_X1510_191.18859.18859.3	R.LLAPPEASGPAPPPAAWVIPGPTTGPK.A	tr|F1SCH4|F1SCH4_PIG	2588.4
0.9967	marcv_X1510_191.18871.18871.2	R.AIVPILLDANVSTYDK.L	tr|F1RS11|F1RS11_PIG	1730.95
1	marcv_X1510_191.18924.18924.3	R.TPVFVSPTPPPPPPPLPSALSTSSLR.A	tr|F1RSY8|F1RSY8_PIG	2638.44
1	marcv_X1510_191.18965.18965.2	R.TPVFVSPTPPPPPPPLPSALSTSSLR.A	tr|F1RSY8|F1RSY8_PIG	2638.44
0.9934	marcv_X1510_191.18987.18987.2	R.IAPLAEGALPYNLAELQR.Q	tr|F1S086|F1S086_PIG,tr|I3L8T2|I3L8T2_PIG	1938.06
0.9952	marcv_X1510_191.18989.18989.2	K.GLEHVTVDDLVAEITPK.G	tr|I3LMR9|I3LMR9_PIG,tr|I3LMK0|I3LMK0_PIG	1834.97
0.9847	marcv_X1510_191.18995.18995.2	K.EDPLLTPVPASENPFR.E	tr|I3LJ42|I3LJ42_PIG	1780.9
1	marcv_X1510_191.19002.19002.2	R.LHFFMPGFAPLTAR.G	tr|F1S6M7|F1S6M7_PIG,tr|I3LBV1|I3LBV1_PIG	1603.83
0.939	marcv_X1510_191.19003.19003.4	R.TPVFVSPTPPPPPPPLPSALSTSSLR.A	tr|F1RSY8|F1RSY8_PIG	2638.44
1	marcv_X1510_191.19020.19020.2	K.M[147.04]QVNAEEVVVGDLVEIK.G	tr|F1RGF9|F1RGF9_PIG	1886.97
1	marcv_X1510_191.19033.19033.3	K.IITHPNFNGNTLDNDIM[147.04]LIKLSSPATLNSR.V	sp|P00761|TRYP_PIG,tr|F1SRS2|F1SRS2_PIG	3324.71
0.9999	marcv_X1510_191.19072.19072.3	K.TNQLLETLNQLSTHTHVVDITR.S	tr|F1SNT8|F1SNT8_PIG	2532.33
0.9847	marcv_X1510_191.19076.19076.2	K.FFQPTEMAAQDFFQR.W	tr|I3LK24|I3LK24_PIG,tr|F1RH60|F1RH60_PIG	1861.85
0.9338	marcv_X1510_191.19097.19097.2	R.MYGVLPWNAFPGK.V	sp|Q712P7|MYPR_PIG,tr|K7GML6|K7GML6_PIG	1478.74
1	marcv_X1510_191.19098.19098.2	K.ALEVAEYLTPVLK.E	tr|F1SLS7|F1SLS7_PIG	1444.82
0.9698	marcv_X1510_191.19119.19119.2	K.LYTLVTYVPVTTFK.N	sp|P62901|RL31_PIG	1643.92
0.9907	marcv_X1510_191.19130.19130.3	R.GVAGALRPLVQAALPATSESPVLDAK.R	tr|F1RNZ1|F1RNZ1_PIG	2530.41
1	marcv_X1510_191.19152.19152.2	R.VALTGLTVAEYFR.D	tr|F1SLA0|F1SLA0_PIG,tr|K7GLT8|K7GLT8_PIG	1438.78
0.9553	marcv_X1510_191.19171.19171.2	K.TSSTDLSDIPALPANPIPVIK.N	tr|I3L6F0|I3L6F0_PIG,tr|F1SAQ7|F1SAQ7_PIG	2148.17
0.9958	marcv_X1510_191.19176.19176.2	R.YFPTQALNFAFK.D	sp|Q6QRN9|ADT3_PIG,tr|F2Z565|F2Z565_PIG,tr|F1RZQ6|F1RZQ6_PIG,tr|F1RRA6|F1RRA6_PIG,tr|I3LDJ6|I3LDJ6_PIG	1445.73
1	marcv_X1510_191.19221.19221.3	R.SQTEEDC[160.03]TEELFDFLHAR.D	tr|F1S3W0|F1S3W0_PIG	2225.95
0.9754	marcv_X1510_191.19320.19320.2	R.VGPLNIPIPVEPIAASK.S	tr|F1RYL9|F1RYL9_PIG	1714
1	marcv_X1510_191.19334.19334.3	R.RTPESFLGPSASSLVNLDSLVK.A	tr|F1RT98|F1RT98_PIG	2316.23
0.9782	marcv_X1510_191.19346.19346.2	R.EDPLIIPVPASENPFR.E	tr|F1RGY2|F1RGY2_PIG	1792.94
0.9861	marcv_X1510_191.19358.19358.2	K.SLPVSVPVWAFK.E	tr|F1RHU2|F1RHU2_PIG	1328.75
0.9944	marcv_X1510_191.19387.19387.2	K.GMSLNLEPDNVGVVVFGNDK.L	sp|P80021|ATPA_PIG,tr|F1RPS8|F1RPS8_PIG	2103.03
1	marcv_X1510_191.19407.19407.2	K.VAGIAAALGGGVLGFTGGK.L	tr|F1SSD4|F1SSD4_PIG	1614.91
0.9282	marcv_X1510_191.19423.19423.2	R.GM[147.04]GGAFVLVLYDEIKK.F	tr|F2Z565|F2Z565_PIG,sp|Q6QRN9|ADT3_PIG,tr|F1RZQ6|F1RZQ6_PIG	1754.93
1	marcv_X1510_191.19427.19427.2	K.LFIGGLSFETTEESLR.N	tr|F1RX74|F1RX74_PIG	1797.91
1	marcv_X1510_191.19447.19447.2	R.GTLLPLDAIDLTDK.L	tr|K7GQI7|K7GQI7_PIG,tr|F1RIS2|F1RIS2_PIG	1483.81
1	marcv_X1510_191.19476.19476.2	K.M[147.04]SSTFIGNSTAIQELFK.R	tr|F1S6M7|F1S6M7_PIG	1888.92
1	marcv_X1510_191.19504.19504.2	M.APPSVFAEVPQAQPVLVFK.L	sp|P00503|AATC_PIG	2023.11
1	marcv_X1510_191.19517.19517.3	K.QLLLATLQEAAATQENVAWRK.N	tr|I3LHN3|I3LHN3_PIG,tr|I3LMC3|I3LMC3_PIG	2353.28
1	marcv_X1510_191.19590.19590.4	K.VLPILILC[160.03]LSIAIAVLPFPLFVK.S	DECOY_tr|I3LH99|I3LH99_PIG_UNMAPPED	2548.58
0.9888	marcv_X1510_191.19607.19607.2	K.DASPVPLLDVTNLPTPR.K	tr|F1SNF7|F1SNF7_PIG	1803.97
1	marcv_X1510_191.19611.19611.3	R.EKPDDPLNYFIGGC[160.03]AGGLTLGAR.T	tr|I3LGM4|I3LGM4_PIG	2420.18
0.9979	marcv_X1510_191.19614.19614.2	K.SPEPEATLTFPFLDK.M	tr|F1S4G7|F1S4G7_PIG	1690.85
0.9889	marcv_X1510_191.19615.19615.2	K.ATLWYVPLSLK.N	tr|F1RIK3|F1RIK3_PIG	1289.74
1	marcv_X1510_191.19654.19654.4	R.LVHLAAAANARLQLWVPRTLLLR.T	DECOY_tr|F1RU47|F1RU47_PIG_UNMAPPED	2594.56
1	marcv_X1510_191.19682.19682.2	K.SDPFLVGIPAATNPFK.E	tr|F1SEX7|F1SEX7_PIG	1672.88
1	marcv_X1510_191.19704.19704.2	K.SYSTSSPINIVVSSAGLSPIR.V	tr|I3LR67|I3LR67_PIG	2134.13
0.9999	marcv_X1510_191.19743.19743.3	K.QFDSPM[147.04]PSPFQGGSFTLPLDVM[147.04]K.N	tr|F1SSS6|F1SSS6_PIG	2557.19
1	marcv_X1510_191.19758.19758.2	K.M[147.04]SATFIGNSTAIQELFK.R	sp|P02554|TBB_PIG,tr|F2Z5B2|F2Z5B2_PIG,tr|F2Z571|F2Z571_PIG	1872.93
0.9917	marcv_X1510_191.19761.19761.2	K.IFPYEMLMVTNR.G	tr|F1S4V5|F1S4V5_PIG	1512.75
0.9958	marcv_X1510_191.19842.19842.2	R.LIPSWTTVILVK.S	tr|F1RGR1|F1RGR1_PIG	1368.84
0.9318	marcv_X1510_191.19862.19862.3	K.AEPTAPGHQGSALGNSTLHQLDALDQLLEEAK.M	tr|F1RVX3|F1RVX3_PIG	3310.64
0.996	marcv_X1510_191.19924.19924.2	K.TVLIM[147.04]ELINNVAK.A	tr|F1SLA0|F1SLA0_PIG	1472.83
1	marcv_X1510_191.19974.19974.2	K.SQSLTNAFSFSESSFFR.S	tr|I3L7D3|I3L7D3_PIG	1940.89
0.9997	marcv_X1510_191.19976.19976.3	K.GHYTEGAELVDSVLDVVR.K	sp|Q767L7|TBB5_PIG,sp|P02554|TBB_PIG,tr|F1S6M7|F1S6M7_PIG,tr|F2Z5B2|F2Z5B2_PIG,tr|F2Z571|F2Z571_PIG	1957.97
0.9975	marcv_X1510_191.20038.20038.2	R.ISALNIVGDLLRK.V	tr|I3L7V2|I3L7V2_PIG,tr|F1SSA7|F1SSA7_PIG,tr|I3L8G0|I3L8G0_PIG,tr|I3LFP0|I3LFP0_PIG	1410.86
1	marcv_X1510_191.20039.20039.2	K.DEWGLVAPISPGPLTPMK.E	tr|F1SSS6|F1SSS6_PIG	1906.99
0.998	marcv_X1510_191.20088.20088.2	R.NLDLDSIIAEVK.A	tr|I3LLY8|I3LLY8_PIG,tr|F1SGG6|F1SGG6_PIG,tr|F1SGG9|F1SGG9_PIG	1328.72
0.9893	marcv_X1510_191.20090.20090.2	R.SLDLDSIIAEVK.A	tr|F1SGI7|F1SGI7_PIG	1301.71
0.9837	marcv_X1510_191.20092.20092.4	R.MWPLAFGSGM[147.04]GLGMAYSNC[160.03]QHDFQAPYLLHGK.Y	tr|I3LAH2|I3LAH2_PIG	3599.62
1	marcv_X1510_191.20124.20124.3	K.VIHDHFGIVEGLMTTVHAITATQK.T	sp|P00355|G3P_PIG	2617.37
0.9921	marcv_X1510_191.20151.20151.2	R.ALPFWNEEIVPQIK.E	tr|F1S8Y5|F1S8Y5_PIG	1682.9
0.9162	marcv_X1510_191.20209.20209.2	K.NATNVEQAFM[147.04]TMAAEIK.K	sp|Q06AU7|RAB1B_PIG	1883.88
0.9965	marcv_X1510_191.20244.20244.2	K.LGELPSWILMR.D	sp|Q95339|ATPK_PIG,tr|F1REX4|F1REX4_PIG	1313.72
0.9915	marcv_X1510_191.20250.20250.3	K.AIHYALDC[160.03]C[160.03]GLM[147.04]GGVEQLLADIC[160.03]PQK.D	tr|F1SL24|F1SL24_PIG,tr|K7GMI9|K7GMI9_PIG,tr|I3LPR3|I3LPR3_PIG	2947.37
0.9943	marcv_X1510_191.20315.20315.3	R.LQDAFSAIGQNADLDLPQIAVVGGQSAGK.S	tr|F1RRW8|F1RRW8_PIG	2882.48
1	marcv_X1510_191.20326.20326.4	K.TLVSVLASALLLLILPNKFQGLYKR.E	DECOY_tr|F1S5U9|F1S5U9_PIG_UNMAPPED	2769.69
1	marcv_X1510_191.20346.20346.4	R.GILIPLVYLVVC[160.03]VVGLLGNSLVIYVVLR.Q	tr|I3LL93|I3LL93_PIG,tr|I3LBZ3|I3LBZ3_PIG	3052.85
1	marcv_X1510_191.20428.20428.2	K.IYLPLLLPPR.-	sp|Q35914|ATP8_PIG	1193.75
0.9742	marcv_X1510_191.20510.20510.3	R.GGSTPPALGDLFAGGFPVLRPAGQR.D	tr|F1SIG6|F1SIG6_PIG	2437.29
1	marcv_X1510_191.20607.20607.2	K.M[147.04]AVTFIGNSTAIQELFK.R	sp|Q767L7|TBB5_PIG	1884.97
0.9963	marcv_X1510_191.20608.20608.2	K.EFADSLGIPFLETSAK.N	sp|Q52NJ2|RAB1A_PIG,sp|Q06AU7|RAB1B_PIG,tr|F2Z5U4|F2Z5U4_PIG,tr|I3L6D2|I3L6D2_PIG	1723.87
1	marcv_X1510_191.20617.20617.2	K.SLC[160.03]PISWVSAWDDR.R	tr|F1RLH7|F1RLH7_PIG	1690.78
1	marcv_X1510_191.20618.20618.2	K.MSATFIGNSTAIQELFK.R	sp|P02554|TBB_PIG,tr|F2Z5B2|F2Z5B2_PIG,tr|F2Z571|F2Z571_PIG	1856.93
0.9703	marcv_X1510_191.20680.20680.2	K.IYLPLLLPPR.-	sp|Q35914|ATP8_PIG	1193.75
1	marcv_X1510_191.20712.20712.4	K.VLGHVNNILISAVLPTAFRVAKK.R	tr|F1RWK1|F1RWK1_PIG	2459.47
1	marcv_X1510_191.20813.20813.2	R.VTIAQGGVLPNIQAVLLPK.K	tr|F2Z587|F2Z587_PIG,tr|F2Z575|F2Z575_PIG,tr|F2Z5L2|F2Z5L2_PIG,tr|F1RPK0|F1RPK0_PIG,tr|I3L7T6|I3L7T6_PIG,tr|F1RTQ7|F1RTQ7_PIG,tr|F2Z5L5|F2Z5L5_PIG,tr|F2Z5L6|F2Z5L6_PIG,tr|F1RPL1|F1RPL1_PIG,tr|F1RPL3|F1RPL3_PIG	1930.16
1	marcv_X1510_191.20816.20816.4	R.TSAIIALVVLLLSIAVLVAITLIQIHQR.E	tr|I3LH47|I3LH47_PIG	2980.88
1	marcv_X1510_191.20869.20869.4	R.M[147.04]ISKLVIQLSPIGSVLKLPRLVK.A	DECOY_tr|F1S675|F1S675_PIG_UNMAPPED	2547.59
0.9933	marcv_X1510_191.20941.20941.4	R.WLLVALLLFILIGVLLSIAIIWGVVYGK.M	DECOY_tr|I3LT72|I3LT72_PIG_UNMAPPED	3094.93
1	marcv_X1510_191.20984.20984.4	R.TLLLTGIFLLTLIIEMILAIFRR.N	DECOY_tr|F1RPD0|F1RPD0_PIG_UNMAPPED	2672.64
1	marcv_X1510_191.20996.20996.4	K.VLLWLLAILIGLIAGKFLFHQR.L	tr|I3LQ58|I3LQ58_PIG	2533.57
0.997	marcv_X1510_191.21019.21019.2	K.EELYTVLAM[147.04]IAVTQR.G	tr|I3LBS8|I3LBS8_PIG	1751.91
0.9991	marcv_X1510_191.21107.21107.3	K.LTTPTYGDLNHLVSATMSGVTTC[160.03]LR.F	sp|Q767L7|TBB5_PIG,sp|P02554|TBB_PIG,tr|F2Z5K5|F2Z5K5_PIG,tr|F2Z5B2|F2Z5B2_PIG,tr|F2Z571|F2Z571_PIG	2707.33
1	marcv_X1510_191.21149.21149.2	R.GM[147.04]GGAFVLVLYDEIK.K	tr|F2Z565|F2Z565_PIG,sp|Q6QRN9|ADT3_PIG,tr|F1RZQ6|F1RZQ6_PIG	1626.83
0.9571	marcv_X1510_191.21163.21163.3	K.SNLVISDPIPGAKPLPVPPELAPFVGR.L	tr|F1RZB0|F1RZB0_PIG	2779.56
0.9998	marcv_X1510_191.21167.21167.3	K.QFDSPM[147.04]PSPFQGGSFTLPLDVMK.N	tr|F1SSS6|F1SSS6_PIG	2541.19
0.9982	marcv_X1510_191.21207.21207.3	K.VSPAPRPSSLPILPSGPLYPGLFDIR.G	tr|F1RH33|F1RH33_PIG,tr|F1RH34|F1RH34_PIG	2745.52
1	marcv_X1510_191.21242.21242.2	K.DPLADLNIKDFL.-	tr|F1RQM6|F1RQM6_PIG	1372.72
0.9998	marcv_X1510_191.21254.21254.3	K.RTPMGIVLDALEQQEENISK.F	sp|Q56P28|PRAF3_PIG	2270.16
1	marcv_X1510_191.21255.21255.2	K.VAVLGASGGIGQPLSLLLK.N	sp|P00346|MDHM_PIG,tr|I3LP41|I3LP41_PIG,tr|I3LB44|I3LB44_PIG	1792.08
1	marcv_X1510_191.21291.21291.2	R.LSSFIGAIAIGDLVK.S	tr|D0G0C8|D0G0C8_PIG	1502.87
1	marcv_X1510_191.21424.21424.4	K.KRVIFLLAVGLTALIVPC[160.03]GITFLK.R	DECOY_tr|F1SB96|F1SB96_PIG_UNMAPPED	2641.61
1	marcv_X1510_191.21437.21437.4	R.NRYLSLFLIVSPPILLLSVIITILVK.Y	tr|F1SGE0|F1SGE0_PIG	2936.84
1	marcv_X1510_191.21522.21522.3	K.AIHYALDC[160.03]C[160.03]GLM[147.04]GGVEQLLADIC[160.03]PQK.D	tr|F1SL24|F1SL24_PIG,tr|K7GMI9|K7GMI9_PIG,tr|I3LPR3|I3LPR3_PIG	2947.37
0.9898	marcv_X1510_191.21567.21567.4	K.AIHYALDC[160.03]C[160.03]GLM[147.04]GGVEQLLADIC[160.03]PQK.D	tr|F1SL24|F1SL24_PIG,tr|K7GMI9|K7GMI9_PIG,tr|I3LPR3|I3LPR3_PIG	2947.37
0.9975	marcv_X1510_191.21583.21583.2	K.VC[160.03]NYVNWIQQTIAAN.-	sp|P00761|TRYP_PIG,tr|F1SRS2|F1SRS2_PIG	1792.86
1	marcv_X1510_191.21592.21592.2	K.AIHYALDC[160.03]C[160.03]GLM[147.04]GGVEQLLADIC[160.03]PQK.D	tr|F1SL24|F1SL24_PIG,tr|K7GMI9|K7GMI9_PIG,tr|I3LPR3|I3LPR3_PIG	2947.37
1	marcv_X1510_191.21603.21603.4	K.LISVSIIVVLILLTVSLC[160.03]IAIFVKKV.-	DECOY_tr|F1RIR2|F1RIR2_PIG_UNMAPPED	2852.82
0.994	marcv_X1510_191.21661.21661.2	R.TESTTPSWLADIPPWVPK.D	tr|F1SI65|F1SI65_PIG,tr|I3LDT2|I3LDT2_PIG	2024.03
0.9961	marcv_X1510_191.21726.21726.2	R.FDSPFLFATVLR.D	tr|F1SCC7|F1SCC7_PIG,tr|F1SCD1|F1SCD1_PIG	1411.75
1	marcv_X1510_191.21746.21746.4	K.KLYLLLVIIAAAVIVPIILLTTIYFTPNAR.L	DECOY_tr|F1RU78|F1RU78_PIG_UNMAPPED	3325.06
1	marcv_X1510_191.21776.21776.3	K.AIHYALDC[160.03]C[160.03]GLM[147.04]GGVEQLLADIC[160.03]PQK.D	tr|F1SL24|F1SL24_PIG,tr|K7GMI9|K7GMI9_PIG,tr|I3LPR3|I3LPR3_PIG	2947.37
1	marcv_X1510_191.21913.21913.4	-.PQAWHDGQLSAPPLLLLLLLLLLLLPLLLPLGK.A	DECOY_tr|F1RNP0|F1RNP0_PIG_UNMAPPED	3591.23
1	marcv_X1510_191.22089.22089.4	K.VLLGLVGFTVLSNILAILISYFNILLALLR.L	tr|F1SJ64|F1SJ64_PIG	3271.01
0.9959	marcv_X1510_191.22212.22212.2	K.RGADPGM[147.04]PEPTVLSLLWG.-	sp|A1XQS2|TOM7_PIG	1910.96
1	marcv_X1510_191.22266.22266.2	K.INVNEIFYDLVR.Q	tr|I3L5L1|I3L5L1_PIG,tr|I3LF84|I3LF84_PIG,tr|F2Z5K3|F2Z5K3_PIG	1493.79
0.9596	marcv_X1510_191.22271.22271.2	K.QFDSPMPSPFQGGSFTLPLDVMK.N	tr|F1SSS6|F1SSS6_PIG	2525.2
1	marcv_X1510_191.22276.22276.5	R.GGSRGSNAC[160.03]C[160.03]FC[160.03]WC[160.03]C[160.03]C[160.03]C[160.03]SC[160.03]SC[160.03]FTVRSQEEQR.L	tr|F1RSG7|F1RSG7_PIG	3912.43
1	marcv_X1510_191.22279.22279.3	K.QFDSPMPSPFQGGSFTLPLDVMK.N	tr|F1SSS6|F1SSS6_PIG	2525.2
1	marcv_X1510_191.22285.22285.4	R.GIWGTEC[160.03]VC[160.03]QGSGTIGDDC[160.03]QGHDSC[160.03]GC[160.03]PQC[160.03]DPGFR.F	DECOY_tr|F1SRK3|F1SRK3_PIG_UNMAPPED	3929.5
1	marcv_X1510_191.22329.22329.4	K.ITLILLFLVIFVVGILGNSVTIRVTQVLQK.K	sp|B2ZHY2|GPR39_PIG,tr|F1RY26|F1RY26_PIG	3309.06
0.9905	marcv_X1510_191.22362.22362.3	K.LLGGVTIAQGGVLPNIQAVLLPK.K	tr|I3L7T6|I3L7T6_PIG,tr|F1RTQ7|F1RTQ7_PIG,tr|F2Z5L6|F2Z5L6_PIG	2270.37
1	marcv_X1510_191.22364.22364.2	K.ALGSDLDSSLASLVGNLGISGTTSK.K	tr|F1RQM6|F1RQM6_PIG	2362.22
0.9999	marcv_X1510_191.22388.22388.3	K.LVSDDLDSSLANLVGNLGIGNGTTK.N	tr|I3LS24|I3LS24_PIG,tr|F1STS9|F1STS9_PIG	2472.27
1	marcv_X1510_191.22389.22389.2	K.LLGGVTIAQGGVLPNIQAVLLPK.K	tr|I3L7T6|I3L7T6_PIG,tr|F1RTQ7|F1RTQ7_PIG,tr|F2Z5L6|F2Z5L6_PIG	2270.37
1	marcv_X1510_191.22398.22398.5	-.RLYLQAAKLLLLLLGLLSAVQLLGSVSALAPVTMR.Q	DECOY_sp|Q9GJX5|CP4AL_PIG_UNMAPPED	3704.25
1	marcv_X1510_191.22499.22499.4	K.DDDDADDDDDDDDDDDDGDDSEAARGENKEEDPK.G	tr|F1RPL0|F1RPL0_PIG	3757.27
1	marcv_X1510_191.22503.22503.4	K.PPRDDDEEEEEEDYEEEEEEEEEEEPEEEK.K	DECOY_tr|I3LA48|I3LA48_PIG_UNMAPPED	3797.39
1	marcv_X1510_191.22539.22539.4	K.HADEEEEEESSSEESSSEEDEDREDEEDSGKR.W	DECOY_tr|I3LP79|I3LP79_PIG_UNMAPPED	3714.38
1	marcv_X1510_191.22735.22735.4	K.VLKKYALPGC[160.03]VVLLVALLVLALIISVVTGAGLGAPSSK.K	DECOY_tr|F1RIA2|F1RIA2_PIG_UNMAPPED	3802.31
0.9924	marcv_X1510_191.22795.22795.2	K.RGADPGMPEPTVLSLLWG.-	sp|A1XQS2|TOM7_PIG	1894.96
1	marcv_X1510_191.22921.22921.3	K.AIHYALDC[160.03]C[160.03]GLMGGVEQLLADIC[160.03]PQK.D	tr|F1SL24|F1SL24_PIG,tr|K7GMI9|K7GMI9_PIG,tr|I3LPR3|I3LPR3_PIG	2931.38
1	marcv_X1510_191.22959.22959.2	K.AIHYALDC[160.03]C[160.03]GLMGGVEQLLADIC[160.03]PQK.D	tr|F1SL24|F1SL24_PIG,tr|K7GMI9|K7GMI9_PIG,tr|I3LPR3|I3LPR3_PIG	2931.38
0.9999	marcv_X1510_191.22977.22977.3	R.LLAM[147.04]M[147.04]TLYFGSGFAAPFFIVR.H	sp|Q1W0Y2|COX7C_PIG	2383.21
1	marcv_X1510_191.22983.22983.2	R.LLAM[147.04]M[147.04]TLYFGSGFAAPFFIVR.H	sp|Q1W0Y2|COX7C_PIG	2383.21
0.9852	marcv_X1510_191.22989.22989.5	R.SLSTMLQVPHNDDYC[160.03]WTMDMSGTSDVPDDGWSYNGNVC[160.03]GSDK.L	tr|F1RJL7|F1RJL7_PIG	4740.91
1	marcv_X1510_191.23134.23134.2	K.ERPPNPIEFLASYLLK.N	tr|F2Z5F7|F2Z5F7_PIG	1886.03
1	marcv_X1510_191.23240.23240.4	R.GIRILYVAVVGITTALAVLGLVSGLLVGHSR.S	DECOY_tr|F1S5G2|F1S5G2_PIG_UNMAPPED	3116.88
0.959	marcv_X1510_191.23242.23242.2	R.VVPSDLYPLVLGFLR.D	tr|F1S8T1|F1S8T1_PIG	1686.97
1	marcv_X1510_191.23281.23281.3	R.LLAMM[147.04]TLYFGSGFAAPFFIVR.H	sp|Q1W0Y2|COX7C_PIG	2367.22
1	marcv_X1510_191.23283.23283.2	R.LLAMM[147.04]TLYFGSGFAAPFFIVR.H	sp|Q1W0Y2|COX7C_PIG	2367.22
1	marcv_X1510_191.23376.23376.4	R.TSSLKPWM[147.04]IILIIAVGVLVLAIIIGVPVYLLAFDKK.F	tr|F1RUS4|F1RUS4_PIG	3922.38
1	marcv_X1510_191.23429.23429.2	R.ATM[147.04]ILTVGGTAYTIYQLAVASLPK.K	tr|F1RQI1|F1RQI1_PIG	2497.35
0.9892	marcv_X1510_191.23495.23495.2	R.VALASGLVLAASLLLPK.A	tr|F1RNI2|F1RNI2_PIG	1635.03
1	marcv_X1510_191.23512.23512.4	R.FPSALGLVLLLEAVAVLIGPPSAGRLVDALK.N	tr|F1SKP1|F1SKP1_PIG	3098.85
1	marcv_X1510_191.23525.23525.4	K.GPELAAVLGLGLGLVLLAPVAAVLVLLLHHRAWR.L	tr|F1RJF8|F1RJF8_PIG	3507.13
0.9862	marcv_X1510_191.23590.23590.5	K.DTM[147.04]EDGLEAAEPEGEEEEEDEEEESTM[147.04]NPEDAEALC[160.03]V.-	DECOY_tr|F1SLF4|F1SLF4_PIG_UNMAPPED	4188.56
1	marcv_X1510_191.23611.23611.2	R.LLAMMTLYFGSGFAAPFFIVR.H	sp|Q1W0Y2|COX7C_PIG	2351.22
1	marcv_X1510_191.23707.23707.4	R.VLIGVTGSVAALKLPLLVSRLLDIPGLEVAVVTTER.A	tr|I3LFK1|I3LFK1_PIG	3711.23
1	marcv_X1510_191.23709.23709.4	K.VLM[147.04]VIIAGIFGIALLVGVTIGVLTVTGLGDKTVTKSR.K	DECOY_tr|K7GME5|K7GME5_PIG_UNMAPPED	3740.23
1	marcv_X1510_191.23722.23722.4	R.SLKPWMVALLVLLLLTVVAVGIGLLAHFLVSGQK.M	tr|F1RUS5|F1RUS5_PIG	3598.18
0.9915	marcv_X1510_192.00004.00004.2	R.TPPPSQGK.G	sp|P81558|MBP_PIG,tr|I3LV79|I3LV79_PIG	810.424
0.9752	marcv_X1510_192.00006.00006.2	K.ASSPAPAHGHH.-	tr|F1S9V7|F1S9V7_PIG	1067.49
0.9903	marcv_X1510_192.00120.00120.2	R.TPPPSQGK.G	sp|P81558|MBP_PIG,tr|I3LV79|I3LV79_PIG	810.424
0.9894	marcv_X1510_192.00247.00247.2	R.TPPPSQGK.G	sp|P81558|MBP_PIG,tr|I3LV79|I3LV79_PIG	810.424
0.9666	marcv_X1510_192.00255.00255.2	R.NYDSM[147.04]K.D	sp|A1XQT2|COX6C_PIG,tr|F1S0P0|F1S0P0_PIG	772.306
0.9568	marcv_X1510_192.00264.00264.2	R.EHAGTYR.C	tr|F1S3K1|F1S3K1_PIG,tr|I3L697|I3L697_PIG	832.383
1	marcv_X1510_192.00271.00271.2	R.THNLKPR.D	tr|F1S387|F1S387_PIG	864.493
0.9207	marcv_X1510_192.00308.00308.2	R.HQLLKK.-	sp|Q1W0Y2|COX7C_PIG,tr|F1RUH7|F1RUH7_PIG	765.486
0.9864	marcv_X1510_192.00314.00314.2	K.AVATPGKK.G	tr|I3LRH2|I3LRH2_PIG	770.465
0.9884	marcv_X1510_192.00423.00423.2	R.TPPPSQGK.G	sp|P81558|MBP_PIG,tr|I3LV79|I3LV79_PIG	810.424
0.975	marcv_X1510_192.00430.00430.2	R.NYDSM[147.04]K.D	sp|A1XQT2|COX6C_PIG,tr|F1S0P0|F1S0P0_PIG	772.306
0.951	marcv_X1510_192.00459.00459.2	R.HQLLKK.-	sp|Q1W0Y2|COX7C_PIG,tr|F1RUH7|F1RUH7_PIG	765.486
0.9568	marcv_X1510_192.00518.00518.2	K.KPAALKPK.V	tr|F1SK12|F1SK12_PIG	851.559
0.986	marcv_X1510_192.00548.00548.2	R.TPPPSQGK.G	sp|P81558|MBP_PIG,tr|I3LV79|I3LV79_PIG	810.424
0.9576	marcv_X1510_192.00588.00588.2	R.HQLLKK.-	sp|Q1W0Y2|COX7C_PIG,tr|F1RUH7|F1RUH7_PIG	765.486
0.9979	marcv_X1510_192.00655.00655.2	K.KPAALKPK.V	tr|F1SK12|F1SK12_PIG	851.559
0.9919	marcv_X1510_192.00691.00691.2	R.TPPPSQGK.G	sp|P81558|MBP_PIG,tr|I3LV79|I3LV79_PIG	810.424
0.9556	marcv_X1510_192.00739.00739.2	R.HQLLKK.-	sp|Q1W0Y2|COX7C_PIG,tr|F1RUH7|F1RUH7_PIG	765.486
0.9744	marcv_X1510_192.00843.00843.2	R.TPPPSQGK.G	sp|P81558|MBP_PIG,tr|I3LV79|I3LV79_PIG	810.424
1	marcv_X1510_192.00874.00874.2	K.KPAALKPK.V	tr|F1SK12|F1SK12_PIG	851.559
0.9484	marcv_X1510_192.00885.00885.2	R.HQLLKK.-	sp|Q1W0Y2|COX7C_PIG,tr|F1RUH7|F1RUH7_PIG	765.486
0.979	marcv_X1510_192.00982.00982.2	R.TPPPSQGK.G	sp|P81558|MBP_PIG,tr|I3LV79|I3LV79_PIG	810.424
0.9384	marcv_X1510_192.01020.01020.2	R.HQLLKK.-	sp|Q1W0Y2|COX7C_PIG,tr|F1RUH7|F1RUH7_PIG	765.486
0.9204	marcv_X1510_192.01062.01062.2	R.HQTELGHR.L	DECOY_tr|F1SDY0|F1SDY0_PIG_UNMAPPED	976.484
0.9335	marcv_X1510_192.01124.01124.2	K.EPQEER.S	tr|F1SHS6|F1SHS6_PIG,tr|F1SBP3|F1SBP3_PIG	786.351
0.9911	marcv_X1510_192.01131.01131.2	R.ALEGHER.Q	tr|I3LGG8|I3LGG8_PIG	810.398
0.9814	marcv_X1510_192.01144.01144.2	R.SPSPKPR.G	tr|I3LCW3|I3LCW3_PIG	767.429
0.9304	marcv_X1510_192.01177.01177.2	R.STSPSPSR.L	tr|I3LA25|I3LA25_PIG,tr|F1SKE6|F1SKE6_PIG	817.393
1	marcv_X1510_192.01181.01181.2	K.TPPGSGESGK.S	tr|F1RRS8|F1RRS8_PIG	915.43
0.9679	marcv_X1510_192.01188.01188.2	K.KIDPNM[147.04]K.A	tr|F1RRE0|F1RRE0_PIG	860.443
0.9143	marcv_X1510_192.01266.01266.2	K.RPAPGPSR.E	tr|F1RFF8|F1RFF8_PIG	836.462
0.9463	marcv_X1510_192.01290.01290.2	K.QKEIIKK.L	tr|I3LRW1|I3LRW1_PIG,tr|F1S0Q0|F1S0Q0_PIG	885.565
0.9691	marcv_X1510_192.01291.01291.2	K.KADGVKPQTNSTK.N	tr|F1SSH3|F1SSH3_PIG	1372.73
0.9999	marcv_X1510_192.01294.01294.3	K.KADGVKPQTNSTK.N	tr|F1SSH3|F1SSH3_PIG	1372.73
0.939	marcv_X1510_192.01307.01307.2	K.HVSDDMK.T	tr|F1SMC0|F1SMC0_PIG	830.359
0.9918	marcv_X1510_192.01344.01344.2	R.HALDAHQR.S	tr|F1SMN6|F1SMN6_PIG	946.473
0.9767	marcv_X1510_192.01377.01377.2	R.APDYKPAHK.G	sp|P81558|MBP_PIG,tr|I3LMX2|I3LMX2_PIG	1025.53
0.9783	marcv_X1510_192.01399.01399.2	R.AVDHVQR.S	tr|F1RXQ7|F1RXQ7_PIG,tr|K7GSY3|K7GSY3_PIG,tr|K7GQC9|K7GQC9_PIG,tr|F1RXQ5|F1RXQ5_PIG	823.43
0.9921	marcv_X1510_192.01419.01419.2	K.KVMEEC[160.03]K.R	sp|A5GFS8|VAPB_PIG	922.425
0.9711	marcv_X1510_192.01436.01436.2	K.ATVEDEK.L	tr|F1S9Q3|F1S9Q3_PIG,tr|F1S9Q1|F1S9Q1_PIG	790.371
0.9181	marcv_X1510_192.01453.01453.3	K.KTEVQAHSPSRK.F	tr|F1SSS6|F1SSS6_PIG	1366.73
0.9852	marcv_X1510_192.01458.01458.2	K.APSGSLHK.D	tr|F1SAH0|F1SAH0_PIG	795.424
0.9999	marcv_X1510_192.01471.01471.3	K.HHENEISHHVK.E	sp|Q29307|ATIF1_PIG	1365.65
0.9588	marcv_X1510_192.01473.01473.2	K.HHENEISHHVK.E	sp|Q29307|ATIF1_PIG	1365.65
0.9897	marcv_X1510_192.01503.01503.2	K.KWAAGQNK.Q	tr|A6N8P5|A6N8P5_PIG	901.477
0.9109	marcv_X1510_192.01536.01536.2	K.KSFAVC[160.03]R.I	DECOY_tr|F1RZQ4|F1RZQ4_PIG_UNMAPPED	866.443
0.9961	marcv_X1510_192.01577.01577.2	R.GQHQAHSLER.V	sp|Q712P7|MYPR_PIG,tr|K7GP87|K7GP87_PIG,tr|K7GRJ9|K7GRJ9_PIG	1161.56
0.9464	marcv_X1510_192.01814.01814.2	R.AQEREQIK.A	tr|F1SGG7|F1SGG7_PIG,tr|I3LDM6|I3LDM6_PIG	1000.53
0.9924	marcv_X1510_192.01822.01822.2	R.RSHYEEGPGK.N	sp|Q1W0Y2|COX7C_PIG	1158.54
1	marcv_X1510_192.01839.01839.2	R.HLVHSVQK.L	tr|F1RXW1|F1RXW1_PIG	946.535
0.9447	marcv_X1510_192.01847.01847.2	K.HLTSNSPR.L	sp|Q8WNW3|PLAK_PIG	910.462
0.9998	marcv_X1510_192.01850.01850.3	R.RSHYEEGPGK.N	sp|Q1W0Y2|COX7C_PIG	1158.54
0.9594	marcv_X1510_192.01889.01889.2	K.AVVTPGKK.A	tr|I3LRH2|I3LRH2_PIG	798.496
0.9143	marcv_X1510_192.01995.01995.2	K.RSPTPSR.L	DECOY_tr|I3LDR4|I3LDR4_PIG_UNMAPPED	799.43
0.9973	marcv_X1510_192.02021.02021.2	R.APDYKPAHK.G	sp|P81558|MBP_PIG,tr|I3LMX2|I3LMX2_PIG	1025.53
0.9483	marcv_X1510_192.02023.02023.2	K.YVNVKK.G	sp|Q95339|ATPK_PIG,tr|F1REX4|F1REX4_PIG	749.444
0.9723	marcv_X1510_192.02046.02046.2	K.HSPVSPSAK.T	tr|F1S146|F1S146_PIG	908.472
0.9781	marcv_X1510_192.02062.02062.2	R.KTQQTDTK.D	DECOY_tr|F1SIP5|F1SIP5_PIG_UNMAPPED	948.488
0.9777	marcv_X1510_192.02117.02117.2	K.YDDIKK.V	sp|P00355|G3P_PIG,tr|F1SLR8|F1SLR8_PIG	780.402
0.9965	marcv_X1510_192.02187.02187.2	R.APDYKPAHK.G	sp|P81558|MBP_PIG,tr|I3LMX2|I3LMX2_PIG	1025.53
0.9911	marcv_X1510_192.02206.02206.2	R.SAAETVTK.G	tr|F1SMZ6|F1SMZ6_PIG	805.418
0.9963	marcv_X1510_192.02266.02266.2	K.ASGAPPGGQQR.Q	tr|B7TY10|B7TY10_PIG,tr|B7TY11|B7TY11_PIG	1024.51
1	marcv_X1510_192.02290.02290.2	R.SHYEEGPGK.N	sp|Q1W0Y2|COX7C_PIG	1002.44
0.9275	marcv_X1510_192.02291.02291.2	R.GREALGGR.E	tr|F1SI65|F1SI65_PIG,tr|I3LDT2|I3LDT2_PIG	814.441
0.9771	marcv_X1510_192.02304.02304.2	R.IDEANQR.A	tr|I3LAV3|I3LAV3_PIG	844.404
0.9903	marcv_X1510_192.02341.02341.2	R.KPESTVPSK.A	tr|F1S4M5|F1S4M5_PIG	971.529
0.9149	marcv_X1510_192.02344.02344.2	R.KPPSFKK.I	DECOY_tr|I3LSD2|I3LSD2_PIG_UNMAPPED	830.501
0.9117	marcv_X1510_192.02368.02368.2	K.RSPTPSR.L	DECOY_tr|I3LDR4|I3LDR4_PIG_UNMAPPED	799.43
0.9671	marcv_X1510_192.02373.02373.2	K.SNDGNSYR.L	tr|F1SIS9|F1SIS9_PIG	911.373
0.9892	marcv_X1510_192.02379.02379.2	K.RSSSPVTPK.A	tr|K7GNA3|K7GNA3_PIG,tr|F1SQN6|F1SQN6_PIG	957.524
0.9532	marcv_X1510_192.02383.02383.2	R.HPPVSPSSK.T	tr|F1S146|F1S146_PIG	934.487
1	marcv_X1510_192.02390.02390.2	K.FC[160.03]HEC[160.03]GTK.Y	tr|F1RWM0|F1RWM0_PIG,tr|I3LV68|I3LV68_PIG	1037.41
0.9919	marcv_X1510_192.02401.02401.2	K.IENHEGVR.R	tr|F1SHL9|F1SHL9_PIG	952.473
0.9964	marcv_X1510_192.02402.02402.2	R.GNTEAQMSK.A	sp|P80229|ILEU_PIG,tr|F2Z5B1|F2Z5B1_PIG,tr|I3LAV6|I3LAV6_PIG	964.428
0.9967	marcv_X1510_192.02410.02410.2	R.APDYKPAHK.G	sp|P81558|MBP_PIG,tr|I3LMX2|I3LMX2_PIG	1025.53
0.9287	marcv_X1510_192.02414.02414.2	K.IASNVQK.K	tr|F1RXZ6|F1RXZ6_PIG	758.429
0.9836	marcv_X1510_192.02468.02468.2	K.TSATVGPK.A	tr|I3L7T6|I3L7T6_PIG	759.413
1	marcv_X1510_192.02521.02521.2	R.SHYEEGPGK.N	sp|Q1W0Y2|COX7C_PIG	1002.44
0.9959	marcv_X1510_192.02531.02531.2	K.ALVATSGKK.G	tr|I3LRH2|I3LRH2_PIG	873.528
0.9954	marcv_X1510_192.02532.02532.2	R.NDEELNK.L	tr|F2Z587|F2Z587_PIG,tr|F2Z575|F2Z575_PIG,tr|F2Z5L2|F2Z5L2_PIG,tr|F1RPK0|F1RPK0_PIG,tr|I3L7T6|I3L7T6_PIG,tr|F1RTQ7|F1RTQ7_PIG,tr|F2Z5L5|F2Z5L5_PIG,tr|F2Z5L6|F2Z5L6_PIG,tr|F1RPL1|F1RPL1_PIG,tr|F2Z5I4|F2Z5I4_PIG,tr|F1RPL3|F1RPL3_PIG	860.388
0.9192	marcv_X1510_192.02556.02556.2	K.SVSEGHLK.R	tr|F1RR02|F1RR02_PIG	855.445
0.9974	marcv_X1510_192.02626.02626.2	R.APDYKPAHK.G	sp|P81558|MBP_PIG,tr|I3LMX2|I3LMX2_PIG	1025.53
0.9965	marcv_X1510_192.02644.02644.2	K.KVTNINDR.S	tr|F1RXC5|F1RXC5_PIG	958.52
0.9477	marcv_X1510_192.02645.02645.2	K.EPLASQK.A	tr|I3L5R1|I3L5R1_PIG	771.413
0.9924	marcv_X1510_192.02676.02676.2	R.GHQLLKK.H	tr|F1RUH7|F1RUH7_PIG	822.508
0.987	marcv_X1510_192.02682.02682.2	R.ETSLDTK.S	tr|F1RR02|F1RR02_PIG	792.387
1	marcv_X1510_192.02743.02743.2	R.SHYEEGPGK.N	sp|Q1W0Y2|COX7C_PIG	1002.44
0.9976	marcv_X1510_192.02870.02870.2	R.APDYKPAHK.G	sp|P81558|MBP_PIG,tr|I3LMX2|I3LMX2_PIG	1025.53
1	marcv_X1510_192.02940.02940.2	R.SHYEEGPGK.N	sp|Q1W0Y2|COX7C_PIG	1002.44
0.9795	marcv_X1510_192.02958.02958.2	K.HIEEVR.K	sp|Q6DUB7|STMN1_PIG,tr|F1SJM1|F1SJM1_PIG	781.408
0.9965	marcv_X1510_192.03047.03047.2	R.APDYKPAHK.G	sp|P81558|MBP_PIG,tr|I3LMX2|I3LMX2_PIG	1025.53
0.938	marcv_X1510_192.03055.03055.2	K.RLQGEM[147.04]VK.L	tr|I3L5C0|I3L5C0_PIG	975.517
0.9316	marcv_X1510_192.03099.03099.2	K.QGVAEAAGK.T	sp|Q3I5G7|SYUA_PIG	829.429
0.9949	marcv_X1510_192.03172.03172.3	K.ALKASSPAPAHGHH.-	tr|F1S9V7|F1S9V7_PIG	1379.71
0.9926	marcv_X1510_192.03216.03216.2	K.QALQGER.E	sp|P02547|NFL_PIG,tr|F1RJU4|F1RJU4_PIG	800.414
0.9651	marcv_X1510_192.03226.03226.2	K.SEVHDLR.V	tr|F1SRA8|F1SRA8_PIG	854.425
1	marcv_X1510_192.03234.03234.2	R.APDYKPAHK.G	sp|P81558|MBP_PIG,tr|I3LMX2|I3LMX2_PIG	1025.53
1	marcv_X1510_192.03270.03270.2	R.SHYEEGPGK.N	sp|Q1W0Y2|COX7C_PIG	1002.44
0.9905	marcv_X1510_192.03355.03355.2	R.IPSNAQEK.K	tr|F1SPS8|F1SPS8_PIG,tr|I3L5R1|I3L5R1_PIG	885.456
0.997	marcv_X1510_192.03367.03367.3	K.ERELEEARK.K	tr|F1SFZ8|F1SFZ8_PIG,tr|I3LDQ1|I3LDQ1_PIG	1158.6
0.9478	marcv_X1510_192.03444.03444.2	K.KLEAAEER.R	sp|Q6DUB7|STMN1_PIG,tr|F2Z508|F2Z508_PIG,tr|K7GMK4|K7GMK4_PIG,tr|K7GP96|K7GP96_PIG,tr|F1RWM1|F1RWM1_PIG	944.493
1	marcv_X1510_192.03450.03450.2	R.APDYKPAHK.G	sp|P81558|MBP_PIG,tr|I3LMX2|I3LMX2_PIG	1025.53
1	marcv_X1510_192.03453.03453.2	R.QASQAGPM[147.04]PR.T	tr|B7TY10|B7TY10_PIG,tr|B7TY11|B7TY11_PIG	1057.5
0.9868	marcv_X1510_192.03454.03454.3	R.RPGEESPEQDRR.V	sp|Q9GLG4|SCG1_PIG,tr|Q6IYD4|Q6IYD4_PIG	1454.69
0.9528	marcv_X1510_192.03508.03508.2	K.EQDYRPK.A	tr|F1RLV6|F1RLV6_PIG	934.451
0.9917	marcv_X1510_192.03520.03520.2	K.HPPVSPGR.T	tr|F1S146|F1S146_PIG	845.451
0.9999	marcv_X1510_192.03534.03534.3	K.NRPGSLDKPGK.Q	tr|F1RVJ2|F1RVJ2_PIG	1167.64
0.9973	marcv_X1510_192.03538.03538.2	R.SHYEEGPGK.N	sp|Q1W0Y2|COX7C_PIG	1002.44
0.9648	marcv_X1510_192.03551.03551.2	R.TPPPGNVK.M	sp|O77735|SCAM1_PIG	808.444
0.9889	marcv_X1510_192.03552.03552.2	K.GSRPIDTSR.L	tr|I3LMH4|I3LMH4_PIG	987.51
0.9925	marcv_X1510_192.03564.03564.2	K.RQTVEQVQK.V	tr|F1SIJ0|F1SIJ0_PIG	1114.61
0.9315	marcv_X1510_192.03611.03611.2	-.FAFHAGLHAM[147.04]R.S	DECOY_tr|F1RSD2|F1RSD2_PIG_UNMAPPED	1272.62
0.9785	marcv_X1510_192.03637.03637.2	K.RLTDADAM[147.04]K.Y	sp|P80021|ATPA_PIG,tr|F1RPS8|F1RPS8_PIG	1035.5
0.9941	marcv_X1510_192.03650.03650.3	K.GKDDPQRETLK.A	sp|Q8WMQ3|CD9_PIG,tr|F1SL24|F1SL24_PIG,tr|K7GMI9|K7GMI9_PIG,tr|I3LPR3|I3LPR3_PIG	1285.66
0.9932	marcv_X1510_192.03663.03663.2	K.IM[147.04]HDVIKK.V	tr|F1RS11|F1RS11_PIG	998.558
0.9699	marcv_X1510_192.03671.03671.2	K.HLLKPDR.N	tr|F1SKF2|F1SKF2_PIG,tr|F1RPJ6|F1RPJ6_PIG	877.513
0.9508	marcv_X1510_192.03676.03676.2	K.LAEQAER.Y	tr|F1SA98|F1SA98_PIG,tr|A5GFP5|A5GFP5_PIG,tr|F1S9F0|F1S9F0_PIG,tr|F1STR9|F1STR9_PIG,tr|F1SDR7|F1SDR7_PIG,tr|F2Z558|F2Z558_PIG,tr|F2Z4Z1|F2Z4Z1_PIG,tr|F2Z4Y1|F2Z4Y1_PIG	815.414
1	marcv_X1510_192.03678.03678.2	K.RAPDFHDK.Y	tr|K7GMN1|K7GMN1_PIG,tr|K7GRT8|K7GRT8_PIG,tr|K7GN29|K7GN29_PIG,tr|K7GQ77|K7GQ77_PIG	984.478
0.9494	marcv_X1510_192.03689.03689.2	K.LVEEC[160.03]K.R	tr|I3L5C0|I3L5C0_PIG	776.374
0.9494	marcv_X1510_192.03691.03691.2	R.QHAFSM[147.04]AR.N	tr|B7TY10|B7TY10_PIG,tr|B7TY11|B7TY11_PIG	962.439
0.9626	marcv_X1510_192.03715.03715.2	R.YIQQAR.K	sp|P01356|CCKN_PIG	777.413
0.9931	marcv_X1510_192.03730.03730.2	K.VHQLETQNR.A	tr|F1S847|F1S847_PIG	1123.57
0.9636	marcv_X1510_192.03752.03752.2	R.APPGAPEK.Q	tr|F1RW46|F1RW46_PIG,tr|K7GNZ1|K7GNZ1_PIG	765.402
0.9874	marcv_X1510_192.03781.03781.2	K.M[147.04]EANIDR.L	tr|I3LJ42|I3LJ42_PIG	863.381
0.9924	marcv_X1510_192.03785.03785.2	K.HATNIMR.S	tr|I3LK60|I3LK60_PIG,tr|F1S778|F1S778_PIG	841.423
0.9999	marcv_X1510_192.03795.03795.3	R.LGHAPEAQGGAK.T	tr|F1SIG6|F1SIG6_PIG	1134.58
0.9427	marcv_X1510_192.03809.03809.2	K.KLEATM[147.04]QLK.A	DECOY_tr|F1SQR5|F1SQR5_PIG_UNMAPPED	1076.59
0.9979	marcv_X1510_192.03815.03815.2	R.KPSLVASK.L	sp|Q712U6|ARP19_PIG	828.507
0.9903	marcv_X1510_192.03831.03831.2	R.SHYEEGPGK.N	sp|Q1W0Y2|COX7C_PIG	1002.44
0.9858	marcv_X1510_192.03837.03837.2	K.TRIDEANQR.A	tr|I3LAV3|I3LAV3_PIG	1101.55
0.9863	marcv_X1510_192.03841.03841.2	K.VSTLTQK.E	tr|F1SQK1|F1SQK1_PIG	775.444
0.967	marcv_X1510_192.03890.03890.2	R.AC[160.03]C[160.03]IAR.F	tr|F1SUM1|F1SUM1_PIG	749.331
0.9652	marcv_X1510_192.03903.03903.2	K.RLSAVER.L	tr|F1RT69|F1RT69_PIG	829.477
0.9703	marcv_X1510_192.03917.03917.2	R.ATDQLQR.A	tr|I3LHT9|I3LHT9_PIG	830.425
0.9999	marcv_X1510_192.03930.03930.3	K.HSPVSPSTKPDR.H	tr|F1S146|F1S146_PIG	1306.66
0.9664	marcv_X1510_192.03935.03935.2	K.HSPVSPSTKPDR.H	tr|F1S146|F1S146_PIG	1306.66
0.9137	marcv_X1510_192.03936.03936.2	R.RSSPPTDVR.Q	tr|F1SDF0|F1SDF0_PIG	1013.53
0.988	marcv_X1510_192.03955.03955.2	K.HQPPPIR.N	tr|I3LN38|I3LN38_PIG	843.472
0.9347	marcv_X1510_192.03965.03965.2	R.YASENVNK.L	sp|Q52NJ2|RAB1A_PIG,sp|Q06AU7|RAB1B_PIG,tr|F2Z5U4|F2Z5U4_PIG,tr|I3L6D2|I3L6D2_PIG	923.435
0.99	marcv_X1510_192.03968.03968.2	R.ILSSTTSK.V	tr|F1S847|F1S847_PIG	835.465
0.9907	marcv_X1510_192.03974.03974.2	R.APDYKPAHK.G	sp|P81558|MBP_PIG,tr|I3LMX2|I3LMX2_PIG	1025.53
0.9857	marcv_X1510_192.03984.03984.2	R.GPAGPSGPAGK.D	tr|F1SFA7|F1SFA7_PIG	894.456
0.9282	marcv_X1510_192.04014.04014.2	R.KEVQQIR.D	tr|D2KQR0|D2KQR0_PIG	899.519
0.9958	marcv_X1510_192.04032.04032.2	K.GAVEHTIR.D	tr|F1SGN8|F1SGN8_PIG	881.472
0.9902	marcv_X1510_192.04058.04058.2	K.M[147.04]EANIDR.L	tr|I3LJ42|I3LJ42_PIG	863.381
0.9845	marcv_X1510_192.04059.04059.2	K.HSTPWEM[147.04]K.W	sp|Q35914|ATP8_PIG	1030.45
0.996	marcv_X1510_192.04061.04061.2	K.GSELQTQAK.T	tr|F1S1A9|F1S1A9_PIG	960.488
0.9874	marcv_X1510_192.04069.04069.2	R.KGPPIYK.K	DECOY_tr|F1RXS2|F1RXS2_PIG_UNMAPPED	801.475
0.9823	marcv_X1510_192.04077.04077.2	R.QAGPPQATR.Q	tr|B7TY10|B7TY10_PIG,tr|B7TY11|B7TY11_PIG	924.478
0.9971	marcv_X1510_192.04079.04079.2	R.TPHTPGTPK.S	tr|F1SSS6|F1SSS6_PIG	934.487
0.9953	marcv_X1510_192.04082.04082.2	K.RLQSEVQR.L	sp|A5GFS8|VAPB_PIG	1014.56
0.9948	marcv_X1510_192.04083.04083.3	K.EKPPPPPPGGGK.D	tr|F1RZR5|F1RZR5_PIG	1156.62
0.9969	marcv_X1510_192.04085.04085.2	R.SQGPGGPHPGPR.Q	tr|I3L5R1|I3L5R1_PIG	1142.56
0.9548	marcv_X1510_192.04126.04126.2	K.AQFEDRN.-	tr|F2Z5F7|F2Z5F7_PIG	878.388
0.9753	marcv_X1510_192.04180.04180.2	R.HLRDEGLR.L	tr|I3L5C0|I3L5C0_PIG	994.531
0.9795	marcv_X1510_192.04210.04210.3	R.LRSEIDHVKK.Q	tr|F1SGG9|F1SGG9_PIG	1223.7
0.9896	marcv_X1510_192.04264.04264.2	K.QVAPEKPVK.K	tr|I3LQI3|I3LQI3_PIG	994.581
1	marcv_X1510_192.04273.04273.2	K.QQAPPVR.N	tr|I3LJE2|I3LJE2_PIG	794.44
0.9321	marcv_X1510_192.04297.04297.2	K.KYIDNPK.L	tr|F1SCS1|F1SCS1_PIG	876.471
0.9397	marcv_X1510_192.04299.04299.2	R.SINQYDR.N	DECOY_tr|K7GKJ1|K7GKJ1_PIG_UNMAPPED	894.42
0.9862	marcv_X1510_192.04311.04311.2	K.RISDLGNK.T	tr|F1S5Y8|F1S5Y8_PIG	901.498
0.988	marcv_X1510_192.04313.04313.2	K.NVDENIRK.L	tr|F1SIQ0|F1SIQ0_PIG	986.515
0.9215	marcv_X1510_192.04327.04327.2	K.RVTIM[147.04]PK.D	sp|Q71LE2|H33_PIG,tr|F2Z5K9|F2Z5K9_PIG,tr|F2Z576|F2Z576_PIG,tr|F1RVA0|F1RVA0_PIG,tr|F1RPL2|F1RPL2_PIG	859.495
0.9828	marcv_X1510_192.04337.04337.2	R.RELEAPK.S	tr|F1SHM3|F1SHM3_PIG	841.466
0.9966	marcv_X1510_192.04352.04352.2	K.IQSSPTPASK.K	tr|I3LCF2|I3LCF2_PIG,tr|I3L7B5|I3L7B5_PIG	1014.53
0.9867	marcv_X1510_192.04358.04358.2	K.IKPVSPGTK.A	tr|F1S3A2|F1S3A2_PIG	925.56
0.9887	marcv_X1510_192.04360.04360.2	K.APGFGDNRK.N	tr|I3L9N6|I3L9N6_PIG,tr|F1SMZ7|F1SMZ7_PIG	960.478
0.987	marcv_X1510_192.04364.04364.2	K.GTNESLER.Q	sp|P02543|VIME_PIG,tr|F1RR02|F1RR02_PIG	904.425
0.9988	marcv_X1510_192.04405.04405.3	K.GEEHC[160.03]GHLIEAHK.E	sp|P81045|COX17_PIG,tr|D2XUP7|D2XUP7_PIG	1515.69
0.9514	marcv_X1510_192.04417.04417.2	R.SPQGEGLR.L	tr|F1SHR1|F1SHR1_PIG	842.425
0.9965	marcv_X1510_192.04421.04421.2	K.GEEHC[160.03]GHLIEAHK.E	sp|P81045|COX17_PIG,tr|D2XUP7|D2XUP7_PIG	1515.69
1	marcv_X1510_192.04424.04424.3	R.SC[160.03]NTATC[160.03]MTHR.L	sp|Q862B1|CRSP1_PIG,tr|F1S983|F1S983_PIG	1337.53
0.9902	marcv_X1510_192.04436.04436.2	R.RAEVLDSTK.S	tr|F1RNZ1|F1RNZ1_PIG	1017.55
0.9916	marcv_X1510_192.04443.04443.2	R.NYDSMK.D	sp|A1XQT2|COX6C_PIG,tr|F1S0P0|F1S0P0_PIG	756.311
0.983	marcv_X1510_192.04444.04444.2	R.RSVGELR.L	tr|F1SSV7|F1SSV7_PIG	815.461
0.9756	marcv_X1510_192.04446.04446.2	R.GANESLER.Q	tr|F1S847|F1S847_PIG	874.414
0.9953	marcv_X1510_192.04451.04451.2	K.RYDVQER.H	tr|F1SIK1|F1SIK1_PIG	964.473
0.9944	marcv_X1510_192.04457.04457.2	R.VQDEYSR.R	tr|F1SDF9|F1SDF9_PIG	895.404
0.9661	marcv_X1510_192.04480.04480.2	K.AEGAGTEEEGTPK.E	tr|F1SRL9|F1SRL9_PIG	1274.56
0.9753	marcv_X1510_192.04510.04510.2	K.VQIINKK.L	tr|F1RRS8|F1RRS8_PIG	841.539
1	marcv_X1510_192.04526.04526.2	K.RYESQLR.E	tr|F1RZT2|F1RZT2_PIG	950.493
0.9439	marcv_X1510_192.04539.04539.2	K.DDPQRETLK.A	sp|Q8WMQ3|CD9_PIG,tr|F1SL24|F1SL24_PIG,tr|K7GMI9|K7GMI9_PIG,tr|I3LPR3|I3LPR3_PIG	1100.55
0.9852	marcv_X1510_192.04544.04544.2	K.GAQDAQGTLSK.L	sp|P81558|MBP_PIG,tr|I3LMX2|I3LMX2_PIG	1074.53
0.9513	marcv_X1510_192.04571.04571.2	R.LKPTNPAAQK.A	tr|F1SUZ2|F1SUZ2_PIG	1066.61
0.9846	marcv_X1510_192.04578.04578.2	R.LPPSSPQK.L	tr|F1SB03|F1SB03_PIG	852.471
0.9979	marcv_X1510_192.04581.04581.3	K.KVVDHYENPR.N	tr|I3LA87|I3LA87_PIG,tr|I3LR64|I3LR64_PIG	1255.63
0.9978	marcv_X1510_192.04589.04589.2	K.KPPPLVK.Q	tr|F1SBX0|F1SBX0_PIG,tr|I3LNF0|I3LNF0_PIG,tr|I3LFI1|I3LFI1_PIG	777.511
0.9733	marcv_X1510_192.04590.04590.2	K.IQSTPVK.Q	sp|Q52NJ2|RAB1A_PIG,tr|F2Z5U4|F2Z5U4_PIG,tr|I3L6D2|I3L6D2_PIG	771.449
1	marcv_X1510_192.04601.04601.3	K.SKPSAASPKPGALK.E	tr|F1SK12|F1SK12_PIG	1337.77
0.9967	marcv_X1510_192.04604.04604.2	R.SSSLGNSPER.G	sp|Q767K7|ATAT_PIG,tr|K7GRQ5|K7GRQ5_PIG,tr|K7GQ14|K7GQ14_PIG,tr|I3L925|I3L925_PIG,tr|K7GKP0|K7GKP0_PIG,tr|K7GS33|K7GS33_PIG,tr|K7GR62|K7GR62_PIG,tr|K7GNW1|K7GNW1_PIG	1032.48
0.9938	marcv_X1510_192.04605.04605.2	R.RTEPASPAVR.A	tr|F1SPS8|F1SPS8_PIG,tr|I3L5R1|I3L5R1_PIG	1082.58
0.9967	marcv_X1510_192.04625.04625.2	K.QASEGPLK.G	sp|P00355|G3P_PIG,tr|F1SLR8|F1SLR8_PIG	828.434
1	marcv_X1510_192.04626.04626.2	K.SPAQPPGPAK.T	tr|F1SBX0|F1SBX0_PIG,tr|F1SBX0|F1SBX0_PIG,tr|I3LNF0|I3LNF0_PIG,tr|I3LNF0|I3LNF0_PIG,tr|I3LFI1|I3LFI1_PIG,tr|I3LFI1|I3LFI1_PIG	948.503
1	marcv_X1510_192.04638.04638.2	K.EDAANNYAR.G	sp|P02550|TBA1A_PIG,sp|Q2XVP4|TBA1B_PIG,tr|F1RK98|F1RK98_PIG,tr|F2Z5S8|F2Z5S8_PIG,tr|F1SHC1|F1SHC1_PIG,tr|F1SR80|F1SR80_PIG,tr|F1SHQ8|F1SHQ8_PIG,tr|F2Z5T5|F2Z5T5_PIG,tr|I3LDR2|I3LDR2_PIG	1022.44
0.9711	marcv_X1510_192.04639.04639.2	R.SPSVSPER.G	tr|I3L5R1|I3L5R1_PIG	857.424
0.9942	marcv_X1510_192.04644.04644.2	R.QQQEQQLAR.M	tr|I3LHI6|I3LHI6_PIG	1127.57
0.9136	marcv_X1510_192.04665.04665.2	R.EHLGLVK.V	DECOY_tr|I3L8W4|I3L8W4_PIG_UNMAPPED	794.465
0.9759	marcv_X1510_192.04676.04676.2	R.RAEGTFPGK.L	tr|F1RLH7|F1RLH7_PIG,tr|F1REZ9|F1REZ9_PIG	961.498
0.993	marcv_X1510_192.04703.04703.2	K.IM[147.04]HDVIK.K	tr|F1RS11|F1RS11_PIG	870.463
0.9764	marcv_X1510_192.04704.04704.2	R.YVELKK.A	tr|F1RGE3|F1RGE3_PIG	778.459
0.9124	marcv_X1510_192.04710.04710.2	K.EDVSPER.Q	DECOY_tr|F1SDY7|F1SDY7_PIG_UNMAPPED	830.377
0.9865	marcv_X1510_192.04730.04730.2	R.EDM[147.04]AALEK.D	sp|P02550|TBA1A_PIG,sp|Q2XVP4|TBA1B_PIG,tr|F2Z5S8|F2Z5S8_PIG,tr|F1SHC1|F1SHC1_PIG,tr|F1SR80|F1SR80_PIG,tr|F2Z5T5|F2Z5T5_PIG	921.411
0.999	marcv_X1510_192.04769.04769.3	R.GPHHLDSSSPGPGSETR.G	tr|I3L9R9|I3L9R9_PIG	1716.78
0.9904	marcv_X1510_192.04773.04773.2	M.VHLSAEEK.E	sp|P02067|HBB_PIG,tr|F1RII7|F1RII7_PIG	911.471
0.9959	marcv_X1510_192.04820.04820.2	K.GAQDAQGTLSK.L	sp|P81558|MBP_PIG,tr|I3LMX2|I3LMX2_PIG	1074.53
0.9309	marcv_X1510_192.04826.04826.2	R.QPAISIK.S	DECOY_tr|F1SU85|F1SU85_PIG_UNMAPPED	755.454
0.9264	marcv_X1510_192.04830.04830.3	K.M[147.04]KDTDSEEEIR.E	tr|F2Z5G3|F2Z5G3_PIG	1367.59
0.9895	marcv_X1510_192.04839.04839.2	K.STSTPTSPGPR.T	tr|I3L9R9|I3L9R9_PIG	1086.53
0.9123	marcv_X1510_192.04862.04862.2	R.RLLQER.E	tr|I3LMY0|I3LMY0_PIG,sp|O77564|FOLH1_PIG,sp|Q29577|KCRU_PIG,tr|A5GFS1|A5GFS1_PIG,tr|Q2HYU1|Q2HYU1_PIG,tr|I3LTL9|I3LTL9_PIG,tr|F1SI77|F1SI77_PIG,tr|F1SQK9|F1SQK9_PIG,tr|K7GQ24|K7GQ24_PIG,tr|K7GQ80|K7GQ80_PIG,tr|I3LS49|I3LS49_PIG,tr|I3LTW4|I3LTW4_PIG,tr|F1SHC3|F1SHC3_PIG,tr|I3LTW9|I3LTW9_PIG,tr|F1S4G7|F1S4G7_PIG	813.482
0.9438	marcv_X1510_192.04864.04864.2	R.MLSDLLAPHK.A	tr|I3LRL4|I3LRL4_PIG,tr|I3L7R9|I3L7R9_PIG	1123.61
1	marcv_X1510_192.04867.04867.2	R.LPGKPYAAHR.L	sp|Q9GLG4|SCG1_PIG,tr|Q6IYD4|Q6IYD4_PIG	1108.61
0.9999	marcv_X1510_192.04869.04869.3	K.KYEDEINKR.T	tr|F1SGG3|F1SGG3_PIG,tr|I3LLY8|I3LLY8_PIG,tr|F1SGG6|F1SGG6_PIG,tr|I3LDM6|I3LDM6_PIG,tr|F1SGG9|F1SGG9_PIG	1193.6
0.994	marcv_X1510_192.04879.04879.2	R.EGTENVPR.T	sp|P01304|NPY_PIG,tr|F1ST92|F1ST92_PIG	900.43
1	marcv_X1510_192.04890.04890.2	R.AAGTDGSDFQHR.E	tr|F1SQE1|F1SQE1_PIG	1260.55
0.9988	marcv_X1510_192.04893.04893.3	K.QVHPDTGISSK.A	tr|F2Z584|F2Z584_PIG,tr|F2Z580|F2Z580_PIG,tr|F2Z5L0|F2Z5L0_PIG,tr|I3LE39|I3LE39_PIG,tr|F2Z579|F2Z579_PIG,tr|F1RTQ6|F1RTQ6_PIG,tr|F2Z581|F2Z581_PIG,tr|F1RTQ5|F1RTQ5_PIG,tr|I3LEB6|I3LEB6_PIG,tr|I3LAQ1|I3LAQ1_PIG,tr|I3LL41|I3LL41_PIG,tr|F2Z578|F2Z578_PIG,tr|F1RFJ3|F1RFJ3_PIG,tr|I3LV95|I3LV95_PIG	1167.59
0.9935	marcv_X1510_192.04894.04894.2	K.QVHPDTGISSK.A	tr|F2Z584|F2Z584_PIG,tr|F2Z580|F2Z580_PIG,tr|F2Z5L0|F2Z5L0_PIG,tr|I3LE39|I3LE39_PIG,tr|F2Z579|F2Z579_PIG,tr|F1RTQ6|F1RTQ6_PIG,tr|F2Z581|F2Z581_PIG,tr|F1RTQ5|F1RTQ5_PIG,tr|I3LEB6|I3LEB6_PIG,tr|I3LAQ1|I3LAQ1_PIG,tr|I3LL41|I3LL41_PIG,tr|F2Z578|F2Z578_PIG,tr|F1RFJ3|F1RFJ3_PIG,tr|I3LV95|I3LV95_PIG	1167.59
0.9978	marcv_X1510_192.04898.04898.2	R.SAGQVVDRPEAK.A	tr|I3L6J1|I3L6J1_PIG	1255.65
1	marcv_X1510_192.04901.04901.3	K.RTTHYGSLPQK.A	tr|I3LMX2|I3LMX2_PIG,sp|P81558|MBP_PIG,tr|I3LV79|I3LV79_PIG	1286.67
0.9912	marcv_X1510_192.04903.04903.2	K.QHLLAVK.Y	DECOY_tr|F1SDY9|F1SDY9_PIG_UNMAPPED	807.497
0.9914	marcv_X1510_192.04909.04909.2	K.GYNVNDEK.A	tr|F1SRL9|F1SRL9_PIG,tr|I3L661|I3L661_PIG	937.414
1	marcv_X1510_192.04914.04914.2	K.VTM[147.04]QNLNDR.L	tr|F1RXG2|F1RXG2_PIG,tr|F1S0L1|F1S0L1_PIG,tr|F1RXF9|F1RXF9_PIG,tr|I3LDS3|I3LDS3_PIG,tr|F1RXG1|F1RXG1_PIG	1105.52
0.9968	marcv_X1510_192.04915.04915.2	K.IMHDVIKK.V	tr|F1RS11|F1RS11_PIG	982.563
0.9934	marcv_X1510_192.04937.04937.2	R.VHISSVR.S	sp|P02547|NFL_PIG,tr|F1RJU4|F1RJU4_PIG	796.456
0.9914	marcv_X1510_192.04940.04940.2	K.KYIPGTK.M	sp|P62895|CYC_PIG,tr|F1RHI4|F1RHI4_PIG,tr|I3LCB9|I3LCB9_PIG,tr|I3LNY8|I3LNY8_PIG	805.47
0.9959	marcv_X1510_192.04941.04941.2	R.AEM[147.04]M[147.04]ELNDR.F	tr|F1RR02|F1RR02_PIG	1139.46
0.9915	marcv_X1510_192.04942.04942.3	K.HVPGGGNVQIQNKK.V	tr|F1SLI3|F1SLI3_PIG	1474.8
0.9928	marcv_X1510_192.04953.04953.2	R.FPNQNQTR.N	tr|F1RLH7|F1RLH7_PIG	1003.48
0.9732	marcv_X1510_192.04955.04955.2	K.SVMDSM[147.04]K.Q	tr|F1RKM6|F1RKM6_PIG	812.341
1	marcv_X1510_192.04959.04959.2	K.QDDGGSPIR.H	tr|F1SM72|F1SM72_PIG,tr|K7GR86|K7GR86_PIG,tr|K7GMV4|K7GMV4_PIG	943.436
0.979	marcv_X1510_192.04997.04997.2	R.SLPQSPTHR.G	tr|I3LCF2|I3LCF2_PIG,tr|I3L7B5|I3L7B5_PIG	1021.53
0.9948	marcv_X1510_192.05005.05005.2	K.RLQGEMVK.L	tr|I3L5C0|I3L5C0_PIG	959.522
1	marcv_X1510_192.05008.05008.2	K.KYEDEINK.R	tr|F1SGG3|F1SGG3_PIG,tr|I3LLY8|I3LLY8_PIG,tr|F1SGG6|F1SGG6_PIG,tr|I3LDM6|I3LDM6_PIG,tr|F1SGG9|F1SGG9_PIG	1037.5
0.9966	marcv_X1510_192.05022.05022.2	K.LAGHFTQDK.A	tr|I3LKI4|I3LKI4_PIG	1015.51
0.9829	marcv_X1510_192.05034.05034.2	K.TLVSPNK.A	tr|A5GFR8|A5GFR8_PIG	757.433
0.9919	marcv_X1510_192.05042.05042.2	K.NWM[147.04]SGGGGGR.S	tr|I3LMC3|I3LMC3_PIG,tr|I3LHN3|I3LHN3_PIG	993.409
0.9995	marcv_X1510_192.05051.05051.3	K.KPVSLGHPGSLKK.G	tr|F1S5C7|F1S5C7_PIG	1346.8
0.9807	marcv_X1510_192.05062.05062.2	K.KPVSLGHPGSLKK.G	tr|F1S5C7|F1S5C7_PIG	1346.8
0.9733	marcv_X1510_192.05097.05097.2	R.QIITQAK.K	tr|A1XQS3|A1XQS3_PIG,tr|F1RK95|F1RK95_PIG	800.476
0.9971	marcv_X1510_192.05115.05115.2	K.YLASASTM[147.04]DHAR.H	sp|P81558|MBP_PIG,tr|I3LMX2|I3LMX2_PIG	1337.6
0.9933	marcv_X1510_192.05128.05128.2	K.GAQDAQGTLSK.L	sp|P81558|MBP_PIG,tr|I3LMX2|I3LMX2_PIG	1074.53
0.9897	marcv_X1510_192.05153.05153.2	R.LAAEDATNEK.Q	sp|P02547|NFL_PIG,tr|F1RJU4|F1RJU4_PIG	1060.5
0.9997	marcv_X1510_192.05161.05161.3	K.YLASASTM[147.04]DHAR.H	sp|P81558|MBP_PIG,tr|I3LMX2|I3LMX2_PIG	1337.6
0.9942	marcv_X1510_192.05177.05177.2	K.LQTLSPSHK.G	tr|F1RWM0|F1RWM0_PIG,tr|I3LV68|I3LV68_PIG	1009.56
0.9842	marcv_X1510_192.05200.05200.2	K.TINDMR.A	DECOY_tr|F1RT27|F1RT27_PIG_UNMAPPED	748.354
0.9604	marcv_X1510_192.05239.05239.2	-.VLSAADKANVK.A	sp|P01965|HBA_PIG,tr|K7GNR8|K7GNR8_PIG,tr|F1RGX4|F1RGX4_PIG	1114.63
0.9446	marcv_X1510_192.05254.05254.2	R.FPNQNQTR.N	tr|F1RLH7|F1RLH7_PIG	1003.48
0.9732	marcv_X1510_192.05259.05259.2	R.QLLAPEVAR.Y	DECOY_tr|I3LGX9|I3LGX9_PIG_UNMAPPED	995.576
0.9625	marcv_X1510_192.05269.05269.2	R.GAENALSSR.Q	sp|P06296|CRF_PIG,tr|K7GQA5|K7GQA5_PIG	903.441
[truncated: 3,039 more rows]
